# Supplementary material for: Whole-Genome Sequencing Reveals Breast Cancers with Mismatch Repair Deficiency
Source: Oxford University Press journal article supplement (doi:10.1158/0008-5472.can-17-1083), 2017-09-13
Supplement: 00085472can171083-sup-181668_2_supp_4164065_qt8c9q.xlsx [file 00085472can171083-sup-181668_2_supp_4164065_qt8c9q.xlsx]

## Sheet: index
Supplementary Table 1: Substitution signature exposures estimated in 640 breast cancer WGS and the ovarian sample (AOCS-166). Analysis used SigFit with either 12 or 30 consensus signatures and 3 different values of alpha.
(a)	Exposure in 640 breast cancer WGS using twelve consensus signatures alpha 0
(b)	Exposure in 640 breast cancer WGS using twelve consensus signatures alpha 0.01
(c)	Exposure in 640 breast cancer WGS using twelve consensus signatures alpha 0.02
(d)	Exposure in 640 breast cancer WGS using thirty consensus signatures alpha 0
(e)	Exposure in 640 breast cancer WGS using thirty consensus signatures alpha 0.01
(f)	Exposure in 640 breast cancer WGS using thirty consensus signatures alpha 0.02
(g)	Exposure in the ovarian sample (AOCS-166) using 3 different values of alpha

## Sheet: (a)12Sigs_alpha0
(a) Exposure in 640 breast cancer WGS using twelve consensus signatures alpha 0
Sample	Signature.1	Signature.2	Signature.3	Signature.5	Signature.6	Signature.8	Signature.13	Signature.17	Signature.18	Signature.20	Signature.26	Signature.30
PD10010a	489	50	532	550	0	387	195	0	0	0	0	224
PD10011a	699	0	3648	1536	0	875	216	651	0	0	644	0
PD10014a	0	112	4048	2501	619	4202	411	0	0	0	228	0
PD11326a	458	223	4145	1006	0	2822	795	0	0	0	96	79
PD11327a	0	127	5703	914	327	4892	748	0	0	0	0	0
PD11336a	1372	490	676	537	0	861	173	436	510	0	0	526
PD11337a	707	228	0	856	0	687	325	0	266	0	0	0
PD11338a	729	0	0	915	0	439	22	0	0	0	0	192
PD11339a	1138	0	0	738	0	367	87	0	0	0	0	196
PD11340a	912	296	0	1428	0	902	351	0	421	0	0	752
PD11341a	491	231	0	401	0	460	66	0	0	0	0	0
PD11342a	676	814	0	1245	0	267	300	0	0	0	0	0
PD11343a	694	129	229	778	37	780	132	0	0	0	0	162
PD11344a	402	4524	0	534	0	0	5566	0	0	0	0	0
PD11345a	896	4160	0	1033	0	1173	2451	0	635	0	0	0
PD11346a	500	396	0	552	0	431	238	0	0	0	0	172
PD11347a	493	355	0	902	0	0	133	0	0	0	0	146
PD11348a	1611	85	0	995	0	1458	204	0	312	0	0	343
PD11349a	975	915	688	1817	0	1673	943	0	0	0	0	435
PD11352a	801	409	0	801	0	355	0	0	0	0	0	217
PD11355a	475	33	0	451	0	447	48	0	289	0	0	92
PD11357a	996	104	0	1407	245	584	41	0	0	0	0	0
PD11358a	656	1475	0	1034	181	585	0	0	0	0	0	393
PD11359a	772	158	0	1075	0	570	89	0	0	0	0	0
PD11360a	882	148	0	1225	195	596	0	0	67	0	0	0
PD11361a	716	107	0	489	0	294	19	0	94	0	0	0
PD11364a	698	53	0	1008	0	435	142	0	0	0	0	0
PD11365a	0	0	0	3125	0	1005	0	524	0	0	8997	0
PD11366a	811	170	0	1165	0	389	0	0	133	0	0	334
PD11367a	854	126	2519	1551	241	2399	194	0	0	0	0	275
PD11368a	1370	1714	0	1719	0	1213	533	0	276	0	0	0
PD11369a	1701	708	0	1543	0	1254	567	0	0	0	0	358
PD11370a	358	5	143	493	0	180	0	0	0	0	75	21
PD11372a	716	4426	0	1210	0	0	7439	0	0	0	0	0
PD11374a	652	19	394	757	0	237	70	0	0	0	0	251
PD11375a	739	74	0	558	127	300	0	0	132	0	0	0
PD11376a	986	125	0	1076	92	282	64	0	267	0	0	255
PD11379a	439	6809	1644	0	0	1228	8920	0	340	0	0	0
PD11380a	708	163	0	1236	0	219	82	0	0	0	0	310
PD11381a	403	102	0	1270	0	194	0	0	0	0	0	126
PD11383a	576	0	0	1008	0	684	86	0	0	0	0	222
PD11384a	583	143	118	728	0	0	94	0	56	0	0	0
PD11385a	509	45	0	811	0	311	46	0	0	0	0	162
PD11386a	766	530	0	1110	0	545	185	0	0	0	0	242
PD11388a	1371	110	417	949	0	1140	296	0	200	0	0	502
PD11389a	398	0	0	691	0	390	24	0	0	0	0	172
PD11391a	233	10	0	683	0	204	16	0	0	0	12	112
PD11393a	1694	85	0	737	0	1019	161	0	969	0	0	0
PD11394a	1263	45	164	349	0	296	24	0	12	0	0	53
PD11395a	913	126	318	947	0	774	35	302	222	0	0	150
PD11396a	662	43	0	685	0	620	64	0	73	0	30	255
PD11397a	1247	209	0	900	0	1175	377	0	522	0	0	393
PD11398a	651	25	464	517	0	531	64	0	0	0	0	92
PD11399a	1153	240	0	984	0	519	104	0	231	0	0	262
PD11402a	786	116	0	1335	0	249	46	0	0	0	0	102
PD11462a	1025	73	0	753	0	708	139	0	0	0	0	138
PD11464a	655	1064	1008	0	0	0	1588	0	180	0	0	0
PD11465a	2301	5037	3067	2253	0	2661	7229	0	0	0	0	0
PD11740a	627	45	0	908	0	559	0	0	0	0	0	193
PD11741a	473	110	0	275	0	656	119	0	340	0	0	0
PD11742a	380	386	2196	1157	0	1656	932	0	0	0	0	295
PD11743a	711	86	773	699	0	729	71	0	0	0	0	235
PD11744a	539	0	0	944	0	384	13	0	0	0	0	0
PD11745a	513	226	0	860	0	976	205	0	235	0	0	0
PD11748a	711	188	6342	757	272	2777	450	47	0	0	212	0
PD11750a	453	0	6532	0	0	0	2662	0	0	0	429	0
PD11751a	1061	527	9042	2538	0	1378	2099	0	0	0	0	0
PD11752a	2336	88	1332	1379	162	1109	160	0	686	0	183	194
PD11753a	1040	226	1893	1904	0	731	0	448	0	0	0	613
PD11755a	292	35	1222	710	0	370	144	0	0	0	0	0
PD11756a	647	236	0	620	0	267	0	0	0	0	0	0
PD11757a	148	26	1051	0	0	287	436	0	0	0	0	0
PD11760a	1523	149	0	815	0	701	0	0	900	0	0	0
PD11761a	401	205	513	1008	0	318	71	0	0	0	0	188
PD11762a	431	154	0	578	0	378	54	0	0	0	0	135
PD11765a	408	60	197	788	0	270	72	0	0	0	43	162
PD11766a	309	112	0	788	0	249	143	0	0	0	0	91
PD11767a	215	0	0	325	0	256	0	0	0	0	0	71
PD11769a	690	85	315	326	0	166	31	0	0	0	0	105
PD11816a	481	491	0	1429	0	678	719	0	0	0	0	211
PD11818a	412	0	0	552	0	378	78	0	0	0	0	183
PD11819a	453	16	200	750	0	241	22	0	0	0	0	0
PD13162a	679	484	962	961	0	0	2170	0	0	0	0	145
PD13163a	899	729	906	1615	0	465	736	0	0	0	0	0
PD13164a	605	95	380	804	0	368	131	0	158	0	0	176
PD13165a	906	1261	0	679	0	1554	635	0	924	0	0	379
PD13166a	573	173	0	727	0	413	294	0	147	0	0	0
PD13167a	834	146	410	824	0	0	190	0	0	0	0	0
PD13168a	874	378	0	401	0	389	122	0	214	0	0	147
PD13296a	1037	336	10239	1077	323	3074	2000	492	0	0	0	0
PD13297a	0	0	4977	1215	0	0	1052	0	0	0	0	7736
PD13298a	1280	160	1937	1390	0	1817	832	0	490	0	0	456
PD13299a	242	986	2524	1471	167	1369	3903	69	0	0	0	0
PD13302a	1511	295	0	1990	0	976	0	0	122	0	0	0
PD13304a	598	38	134	416	40	289	0	0	0	0	0	0
PD13306a	528	319	119	457	0	391	0	0	0	0	0	209
PD13307a	956	1892	0	790	0	706	1007	0	0	0	0	0
PD13310a	743	30	0	603	0	282	22	0	0	0	0	148
PD13311a	278	0	2559	620	0	684	149	71	0	0	145	0
PD13312a	460	24	0	1175	0	279	65	26	0	0	0	0
PD13416a	622	30	0	649	0	406	46	0	0	0	0	183
PD13418a	1158	1141	970	849	208	479	1999	0	0	0	0	0
PD13419a	298	72	0	533	0	168	18	0	0	0	0	0
PD13420a	603	1	271	434	0	271	39	0	0	0	127	113
PD13422a	498	74	0	504	56	387	33	0	154	0	0	96
PD13424a	1115	109	589	528	164	954	189	0	125	0	0	177
PD13425a	1289	5599	4748	3538	0	0	17992	0	1333	0	0	0
PD13426a	776	129	0	1209	0	384	0	0	0	0	0	198
PD13427a	350	0	0	558	0	197	27	0	0	0	0	0
PD13428a	719	0	0	1561	0	490	152	0	0	0	0	497
PD13602a	1153	49	1452	1341	0	754	347	0	399	0	0	415
PD13603a	716	232	0	1000	0	579	376	0	158	0	0	0
PD13604a	0	42651	0	0	0	0	45238	0	5212	0	0	0
PD13605a	373	0	221	353	0	239	48	0	0	0	0	0
PD13606a	1430	188	0	1821	0	1614	245	0	592	0	0	0
PD13607a	864	232	0	1228	0	666	295	0	0	0	0	0
PD13608a	817	654	0	728	0	379	1138	54	0	0	132	201
PD13609a	417	1196	0	739	0	359	1993	0	0	0	0	0
PD13618a	482	229	0	1039	0	0	81	0	0	0	0	0
PD13619a	632	91	0	1387	0	0	0	0	0	0	0	0
PD13620a	1412	68	0	1153	0	1231	277	0	184	0	0	270
PD13622a	1166	78	577	786	109	939	0	0	626	0	0	70
PD13623a	597	1473	393	374	0	193	305	0	69	0	121	270
PD13625a	1631	457	0	0	0	5071	429	2974	0	0	0	675
PD13626a	340	0	0	510	0	175	50	0	0	0	0	0
PD13627a	565	0	5321	1089	0	499	581	103	0	0	281	0
PD13629a	521	333	0	437	46	350	71	0	0	0	97	171
PD13630a	681	557	0	857	0	926	789	0	0	0	0	293
PD13631a	526	159	0	1061	0	554	121	0	180	0	0	0
PD13752a	546	73	0	1000	0	724	56	151	0	0	0	256
PD13753a	555	2364	0	1358	0	0	3716	0	0	0	0	0
PD13754a	672	0	0	1268	0	463	101	0	0	0	0	0
PD13755a	579	36	0	682	0	285	31	0	0	0	123	197
PD13756a	527	0	0	981	0	405	53	0	0	0	0	115
PD13757a	358	344	0	442	0	190	150	0	0	0	0	0
PD13758a	355	0	0	1270	0	343	33	0	0	0	0	296
PD13760a	489	167	1218	755	0	1395	608	0	0	0	0	0
PD13761a	327	34	0	837	0	262	0	0	0	0	0	225
PD13762a	498	0	0	618	0	343	29	0	0	0	0	163
PD13763a	834	140	0	907	0	634	46	0	0	0	0	0
PD13764a	686	238	858	1618	0	1033	393	0	0	0	0	0
PD13765a	1180	94	0	556	0	919	160	0	1993	0	0	573
PD13766a	386	1586	0	610	0	264	763	0	0	0	0	224
PD13767a	584	258	0	968	0	308	53	0	131	0	0	332
PD13768a	521	35	0	771	0	0	23	0	0	0	0	0
PD13770a	590	110	0	747	0	353	34	0	241	0	0	0
PD13771a	270	404	5128	1260	0	3132	1629	0	0	0	0	1263
PD14432a	404	0	0	783	0	377	48	0	0	0	0	256
PD14433a	822	1189	0	974	0	276	319	0	0	0	0	0
PD14435a	1185	231	0	1289	0	736	272	0	0	0	0	0
PD14437a	1018	153	0	1808	0	1038	344	0	0	0	0	0
PD14439a	423	51	0	432	0	159	0	0	158	0	0	90
PD14441a	391	54	976	1145	0	1398	272	0	102	0	0	321
PD14442a	430	42	0	740	0	415	38	0	0	0	0	77
PD14450a	278	0	0	603	0	216	54	0	0	0	0	144
PD14453a	960	2067	2006	1171	0	1231	2329	149	0	0	0	0
PD14454a	542	135	386	707	0	576	162	0	0	0	0	0
PD14456a	742	0	0	750	0	208	27	0	164	0	0	83
PD14457a	1174	296	0	1147	0	703	0	0	828	0	0	416
PD14458a	534	18	0	323	0	285	41	0	44	0	78	187
PD14459a	650	102	0	474	0	287	36	0	391	0	0	143
PD14460a	909	1821	0	903	0	0	889	0	0	0	0	0
PD14461a	524	11	103	630	0	129	34	0	0	0	0	0
PD14462a	762	368	0	699	0	248	274	0	0	0	100	174
PD14465a	965	83	0	1019	0	503	128	0	195	0	0	201
PD14467a	620	74	0	569	0	280	79	0	0	0	0	0
PD14468a	571	38	0	673	0	116	27	0	44	0	0	78
PD14471a	1317	92	462	322	0	808	60	0	0	0	124	82
PD14472a	573	178	0	862	0	445	115	0	0	0	0	121
PD14473a	590	32	281	287	0	189	37	0	0	0	0	124
PD17973a	555	53	0	547	0	378	0	0	490	0	0	0
PD17981a	2424	1264	0	987	0	931	294	0	977	0	83	0
PD17991a	515	59	0	523	0	123	0	0	0	0	0	0
PD17994a	443	216	0	414	0	174	57	0	0	0	0	0
PD18017a	429	90	0	1037	0	486	64	0	0	0	0	0
PD18020a	865	513	8146	1013	0	3291	3784	0	0	0	156	0
PD18022a	522	104	209	241	0	334	129	0	0	0	35	24
PD18024a	623	0	6385	1011	0	2023	521	137	317	0	83	0
PD18031a	784	100	473	543	0	413	230	0	67	0	0	155
PD18037a	2985	251	0	1910	0	289	139	0	394	0	0	0
PD18045a	2634	3730	1963	1313	0	817	9008	0	0	0	0	0
PD18046a	910	111	0	1138	0	610	129	0	0	0	0	0
PD18047a	817	68	0	754	0	436	94	0	0	0	0	172
PD18048a	1177	114	520	2397	0	337	238	0	0	0	0	0
PD18049a	867	450	0	1530	0	312	231	0	0	0	0	0
PD18050a	1400	324	429	672	0	459	280	0	0	0	0	0
PD18100a	423	96	0	497	0	320	56	0	136	0	0	0
PD18101a	320	0	0	282	0	213	46	0	0	0	0	0
PD18116a	465	77	202	275	0	293	56	0	0	0	77	95
PD18149a	551	48	413	1175	0	205	64	0	0	0	0	111
PD18188a	613	77	0	982	0	349	61	0	0	0	0	151
PD18189a	678	475	0	893	0	1183	285	0	420	0	0	335
PD18247a	596	2911	645	0	0	0	4982	0	0	0	0	0
PD18251a	621	157	1229	1394	0	0	84	0	0	0	0	0
PD18257a	621	257	0	630	0	620	439	0	236	0	0	166
PD18258a	405	5	205	221	0	156	11	0	53	0	0	81
PD18259a	715	433	1894	315	177	2479	411	0	0	0	0	210
PD18264a	640	3397	0	483	0	282	1632	0	102	0	0	140
PD18269a	381	0	0	646	0	213	11	0	0	0	0	132
PD18728a	390	211	0	657	0	313	0	0	0	0	104	91
PD18730a	369	498	0	468	0	0	564	0	0	0	0	0
PD18733a	529	158	0	1194	0	635	108	0	173	0	0	219
PD18734a	803	101	0	930	208	1169	136	0	333	0	0	143
PD18748a	942	591	0	892	0	380	151	0	0	0	0	0
PD18749a	428	909	0	991	0	0	2331	0	0	0	0	0
PD18751a	720	58	0	520	0	350	44	0	76	0	0	135
PD18754a	677	709	0	460	0	181	275	0	149	0	0	139
PD18756a	651	21	0	381	0	231	50	0	104	0	0	194
PD18768a	590	72	0	1351	0	480	61	0	0	0	0	0
PD18769a	343	498	0	902	0	0	1237	0	0	0	0	0
PD18771a	541	0	0	869	0	146	62	0	0	0	30	126
PD18775a	419	50	0	388	0	318	35	0	0	0	0	118
PD18776a	519	0	0	710	0	362	37	0	0	0	0	0
PD22036a	267	0	0	532	0	150	21	0	33	0	0	41
PD22251a	552	41	0	693	0	171	44	0	0	0	0	0
PD22355a	706	0	3357	879	364	3954	437	0	0	0	0	60
PD22357a	807	2189	0	1421	0	865	2435	0	0	0	0	0
PD22358a	289	46	3187	831	0	922	878	0	0	0	0	0
PD22359a	431	196	0	733	0	246	42	0	0	0	0	166
PD22360a	256	174	4273	992	0	2079	732	0	0	0	0	0
PD22361a	865	1366	0	717	0	832	2117	0	0	0	0	0
PD22362a	264	296	0	395	0	513	110	0	109	0	0	259
PD22363a	104	121	3978	844	406	2931	290	0	0	0	0	227
PD22364a	807	468	0	807	0	0	317	0	0	0	0	0
PD22365a	288	0	446	447	0	543	52	0	0	0	0	127
PD22366a	525	374	4874	1184	0	1326	1523	0	0	0	0	0
PD23550a	743	406	0	725	0	471	154	0	0	0	0	364
PD23554a	0	59	2820	651	239	2573	456	26	0	0	71	0
PD23558a	448	369	4543	1321	280	2322	592	0	0	0	0	254
PD23559a	593	234	1365	1582	0	1074	408	123	0	0	0	0
PD23560a	467	197	621	603	0	485	401	40	0	0	50	137
PD23561a	0	16982	0	0	4721	2087	29371	0	857	0	4008	0
PD23562a	659	60	3949	1092	0	738	624	0	0	0	223	0
PD23563a	0	0	3435	632	318	3352	297	0	0	0	0	186
PD23564a	21708	0	0	0	38836	0	0	0	0	0	21597	1303
PD23565a	1477	2670	0	1242	0	949	2511	0	0	0	0	0
PD23566a	441	0	3318	881	114	1798	78	0	0	0	0	35
PD23567a	452	70	2593	1260	180	2599	40	0	0	0	0	0
PD23569a	91	38	293	376	0	205	48	0	0	0	0	0
PD23570a	380	606	0	612	0	139	301	0	0	0	0	203
PD23574a	631	351	6853	1104	0	1777	2374	0	0	0	0	0
PD23577a	345	53	1413	1207	0	711	154	85	0	0	0	0
PD23578a	70	81	3142	724	194	2316	240	0	0	0	69	0
PD23579a	0	0	0	9277	20876	0	0	0	0	30201	22314	4641
PD24182a	476	296	4279	1660	0	764	2059	0	0	0	0	0
PD24186a	183	0	3436	1468	0	1635	272	200	0	0	290	0
PD24189a	3209	0	0	2710	9239	0	0	0	0	5959	8470	0
PD24190a	219	127	915	3038	0	2492	622	2118	272	0	0	0
PD24191a	299	46	3291	1794	0	543	144	0	0	0	0	0
PD24192a	556	413	11611	1427	0	1362	1621	0	0	0	832	0
PD24193a	0	327	0	544	3287	968	410	0	0	1362	3726	610
PD24194a	507	5323	704	1022	0	695	5302	139	0	0	0	0
PD24195a	397	36	0	1086	0	411	52	0	0	0	0	255
PD24196a	365	109	627	627	0	588	256	0	44	0	0	0
PD24197a	0	135	8236	0	0	10100	480	263	0	0	253	745
PD24199a	513	141	609	959	0	413	215	0	0	0	0	0
PD24200a	65	1	524	92	0	271	18	0	0	0	0	0
PD24201a	1144	442	4329	2932	0	9270	1267	162	0	0	0	927
PD24202a	481	209	3178	1052	138	1858	859	0	0	0	0	0
PD24204a	1478	0	0	753	0	225	40	0	297	0	0	0
PD24205a	342	116	3248	1399	363	2570	401	0	0	0	0	485
PD24206a	335	315	0	1574	0	1167	217	0	0	0	0	0
PD24207a	1121	1174	328	921	0	171	1028	0	0	0	0	0
PD24208a	0	15711	0	0	0	0	9912	0	0	0	0	0
PD24209a	146	1931	1567	433	127	977	4787	0	0	0	0	196
PD24212a	548	302	2733	1679	0	3542	533	0	0	0	0	715
PD24214a	1292	0	0	588	0	791	0	0	406	0	0	0
PD24215a	287	181	1191	1562	0	2086	589	53	224	0	0	0
PD24216a	479	2810	0	1974	0	1289	2676	0	0	0	108	0
PD24217a	0	4153	0	0	0	0	11151	0	0	0	0	0
PD24218a	437	133	0	2093	0	399	102	0	0	0	0	121
PD24219a	1717	45	0	993	0	486	76	0	0	0	0	0
PD24220a	1189	179	0	967	0	485	788	0	0	0	0	0
PD24221a	210	0	0	1416	0	349	120	0	195	0	0	0
PD24223a	833	890	0	1143	0	478	82	0	0	0	0	0
PD24224a	541	132	0	968	0	372	110	0	86	0	0	0
PD24225a	290	374	0	550	0	319	209	0	76	0	0	0
PD24302a	393	87	0	787	0	0	0	0	0	0	0	0
PD24303a	208	0	2514	418	0	732	625	0	0	0	0	0
PD24304a	0	0	2484	470	0	3456	231	0	0	0	0	209
PD24306a	124	0	1374	369	0	1152	179	15	0	80	39	0
PD24307a	340	55	0	492	0	453	47	0	0	0	79	125
PD24308a	657	36	1268	2109	0	302	377	0	0	0	0	0
PD24314a	809	69	993	1212	0	336	148	0	300	0	0	0
PD24318a	644	0	0	996	0	470	106	0	0	0	143	183
PD24320a	1360	0	0	960	0	510	0	0	0	0	12863	0
PD24322a	930	639	1320	1106	0	0	870	0	0	0	0	0
PD24325a	1255	65	3462	2836	0	1152	1460	112	41	0	0	0
PD24326a	0	11709	0	0	0	0	10839	0	1070	0	0	0
PD24327a	735	6061	0	1663	0	663	7061	0	0	0	0	0
PD24329a	920	143	161	425	0	364	38	0	57	0	0	0
PD24332a	750	144	185	348	0	444	47	0	0	0	0	0
PD24333a	0	0	0	0	0	0	1341	21542	0	0	0	0
PD24335a	1458	180	600	640	0	565	294	0	0	0	0	208
PD24336a	263	307	0	1427	0	828	247	0	0	0	0	263
PD24337a	463	33	2834	1002	0	1079	293	0	0	0	0	0
PD3851a	410	87	0	512	0	603	41	0	44	0	0	119
PD3890a	318	159	3028	531	0	584	775	187	0	0	0	0
PD3904a	0	326	1640	946	0	1537	500	0	0	0	0	716
PD3905a	273	187	1730	828	0	1049	534	0	0	0	0	0
PD3945a	0	319	3336	2530	303	3357	703	0	0	0	0	0
PD3989a	731	265	0	493	0	432	84	0	19	0	0	212
PD4005a	409	670	2011	816	0	537	1595	0	0	0	0	0
PD4006a	412	0	5589	687	286	2319	279	0	0	0	0	0
PD4069a	766	70	0	445	0	346	0	0	215	0	0	240
PD4072a	0	13802	0	0	0	0	14128	0	0	0	0	0
PD4076a	699	261	0	812	0	258	0	0	0	0	0	59
PD4085a	593	55	0	750	0	940	107	0	0	0	0	255
PD4086a	256	207	292	541	0	206	447	0	0	0	0	0
PD4088a	661	99	375	0	0	212	101	0	240	0	0	0
PD4103a	1222	623	0	1386	0	548	609	0	457	0	0	370
PD4107a	266	742	3518	2129	0	3022	193	0	0	0	0	0
PD4109a	1811	515	2417	2277	0	1461	1828	0	0	0	0	0
PD4115a	464	129	3603	2077	0	2578	373	322	43	0	0	158
PD4116a	0	264	2872	1567	145	2323	880	0	0	0	0	116
PD4192a	627	202	1881	918	0	0	603	58	0	0	0	0
PD4194a	419	112	0	314	0	268	198	0	0	0	0	113
PD4198a	1136	613	0	1679	0	816	271	0	0	0	0	0
PD4199a	662	2587	442	179	0	324	2457	0	91	0	0	201
PD4225a	985	92	0	395	0	316	52	0	0	0	0	113
PD4248a	317	93	0	853	0	508	140	0	0	0	0	282
PD4252a	1000	26	538	982	0	408	131	0	473	0	0	210
PD4255a	722	0	0	1853	0	1024	229	0	723	0	0	0
PD4261a	484	0	0	1253	0	0	57	0	0	0	0	0
PD4264a	927	230	0	570	0	263	21	0	0	0	0	105
PD4266a	347	798	0	864	0	0	377	0	0	0	0	0
PD4267a	647	125	0	593	0	286	465	0	0	0	0	0
PD4315a	666	511	479	631	0	487	422	0	188	0	0	0
PD4604a	412	163	2990	1789	0	2914	580	0	0	0	0	471
PD4605a	1032	0	0	1011	0	200	227	0	0	0	0	177
PD4606a	382	42	0	611	0	92	0	0	0	0	0	0
PD4607a	0	16125	0	0	0	0	9827	0	0	0	0	0
PD4613a	262	631	0	426	110	263	500	0	0	0	0	0
PD4826a	740	529	0	1284	0	670	591	0	0	0	0	0
PD4833a	401	47	3536	935	0	839	489	0	0	0	0	152
PD4836a	671	67	1315	1020	0	650	302	0	0	0	0	274
PD4841a	646	168	2504	1360	0	1724	284	96	0	0	235	0
PD4844a	616	260	6865	2950	0	1138	978	0	0	0	0	0
PD4845a	592	0	1648	976	0	1592	73	781	0	0	70	0
PD4847a	1048	359	0	5216	0	2969	0	647	801	0	0	0
PD4872a	0	447	1034	396	232	1593	718	0	0	0	117	268
PD4874a	203	702	1931	1436	0	2567	2281	267	0	0	0	317
PD4875a	519	108	2043	1766	160	1513	317	94	166	0	0	114
PD4876a	227	213	2444	1048	0	527	446	0	0	0	0	0
PD4951a	266	32	840	478	0	650	261	0	0	0	78	171
PD4952a	1000	491	4015	2005	0	2937	904	0	0	118	0	557
PD4953a	285	116	3022	1243	0	1380	390	0	197	0	0	309
PD4954a	424	208	2677	912	0	889	415	0	0	0	0	237
PD4955a	169	159	1777	1039	176	1927	447	0	0	0	0	373
PD4956a	760	0	7580	1407	0	423	1410	0	0	0	0	0
PD4957a	300	196	786	852	0	870	272	0	0	0	0	0
PD4958a	233	506	2380	2052	0	2849	730	0	0	0	0	584
PD4959a	316	72	1619	343	219	1543	109	0	0	0	155	232
PD4962a	290	1527	580	551	0	1269	2474	0	148	0	0	0
PD4965a	721	58	0	973	0	587	50	0	103	0	0	210
PD4967a	530	565	372	644	0	259	855	0	0	0	0	0
PD4968a	1318	1018	0	1148	0	918	124	0	0	0	0	251
PD4969a	244	55	0	519	0	154	0	0	57	0	0	0
PD4970a	649	82	0	853	0	467	123	0	0	0	0	232
PD4971a	964	118	478	423	0	712	68	0	0	0	0	0
PD4972a	327	0	0	363	0	242	30	0	26	0	52	101
PD4975a	638	81	4038	1252	0	1240	254	0	0	0	0	0
PD4976a	1915	134	1192	1771	0	306	436	0	519	0	0	0
PD4977a	1200	22257	1436	0	0	0	17362	0	0	0	0	0
PD4978a	596	536	0	1116	0	815	670	0	0	0	0	0
PD4980a	618	66	0	1306	0	1094	172	0	537	0	0	0
PD4981a	621	8	0	426	0	314	18	0	91	0	0	182
PD4982a	562	35	0	658	0	218	0	0	0	0	0	0
PD4983a	386	37	0	1192	0	58	22	0	0	0	0	64
PD4985a	514	52	0	950	0	300	69	0	0	0	0	116
PD4986a	388	29	433	597	0	338	0	0	0	0	79	108
PD5925a	222	260	3378	2315	0	1382	1220	0	0	0	0	0
PD5928a	547	156	2944	611	0	2242	255	46	0	0	0	307
PD5930a	351	55	1926	655	0	498	457	0	0	0	0	0
PD5932a	433	224	4854	1964	0	833	1748	0	0	0	0	0
PD5934a	480	126	6923	0	330	3377	279	60	0	0	0	0
PD5935a	903	101	6348	791	0	0	1139	0	0	0	386	0
PD5936a	745	252	0	1157	0	626	0	0	0	0	0	0
PD5937a	0	26190	0	0	11610	2124	17991	0	0	11083	5815	1281
PD5942a	1341	145	1800	1692	0	259	353	0	191	0	0	205
PD5944a	801	76	0	1055	0	570	105	0	0	0	0	0
PD5945a	400	99	4589	935	0	2351	456	0	0	0	0	0
PD5946a	1323	136	494	921	0	385	153	0	295	0	0	201
PD5947a	497	177	0	396	0	284	219	0	51	0	0	152
PD5948a	640	0	10315	950	0	974	305	100	0	0	1885	0
PD5950a	944	0	0	629	0	318	47	0	249	0	0	0
PD5951a	1393	213	0	1071	0	403	111	0	0	0	0	0
PD5953a	721	36	196	724	0	317	21	0	0	0	117	0
PD5956a	484	117	0	712	180	1814	91	0	407	0	0	276
PD5959a	566	229	0	1366	0	0	90	0	0	0	0	251
PD5960a	153	93	969	800	295	1212	173	0	0	0	75	271
PD5961a	748	216	0	414	0	343	56	0	177	0	0	357
PD5964a	385	51	167	342	0	393	68	0	114	0	0	66
PD6016a2	503	397	140	499	0	160	209	0	0	0	0	0
PD6041a	495	46	0	980	0	247	0	0	0	0	0	0
PD6042a	297	532	1989	1384	0	1770	1064	0	0	0	0	80
PD6043a	0	6607	3426	0	0	4357	7476	0	462	0	0	432
PD6044a	672	23	0	843	0	390	144	0	0	0	214	284
PD6045a	374	528	0	384	0	328	191	0	168	0	164	192
PD6046a	851	106	249	659	0	429	55	0	371	0	0	252
PD6047a	1685	269	1511	3154	355	558	384	0	982	0	0	540
PD6048a	986	116	333	344	0	612	211	0	241	0	0	254
PD6404a	749	277	2396	1662	0	600	525	339	0	0	0	0
PD6405a	1071	6063	0	0	0	0	27073	0	0	0	1108	0
PD6406a	304	0	2786	726	0	810	345	52	0	0	0	0
PD6409a	330	43	4260	173	0	2785	1101	77	36	0	0	0
PD6410a	430	0	3692	1126	0	1199	863	0	0	0	0	0
PD6411a	406	64	4350	518	0	746	587	0	0	0	0	0
PD6412a	0	0	0	3983	5269	4806	520	625	0	3710	6270	0
PD6413a	302	256	1924	283	0	1028	597	0	0	0	0	195
PD6414a	381	106	0	840	0	195	45	0	0	0	0	192
PD6415a	549	546	3781	1417	0	1661	1588	0	0	0	0	0
PD6416a	116	108	1140	356	0	920	410	278	0	0	0	0
PD6417a	737	45	238	465	0	0	59	0	0	0	0	0
PD6418a	546	47	0	830	0	367	0	0	0	0	0	228
PD6422a	875	343	0	1797	0	1098	212	0	323	0	0	530
PD6466b	520	154	0	1134	0	0	0	0	0	0	0	0
PD6684a	655	42	7421	2555	0	0	2807	195	0	0	0	0
PD6711a2	676	105	418	419	0	0	0	0	0	0	0	294
PD6719a	662	0	2135	914	0	1098	158	0	0	0	0	0
PD6720a	630	91	0	1048	0	158	88	0	0	0	0	0
PD6721a	797	122	0	618	0	456	100	0	0	0	0	135
PD6722a	0	1901	1360	592	0	803	4947	0	304	0	0	200
PD6727b	1682	239	2126	1506	0	0	1124	0	0	0	0	0
PD6728b	417	62	674	444	0	643	164	0	86	0	0	85
PD6729a2	1028	70	1578	1446	0	565	182	0	0	0	0	0
PD6730b	613	115	5269	1369	0	2184	416	0	120	0	0	0
PD6731a2	406	1110	1733	1283	0	1191	2823	0	0	0	0	0
PD6732b	531	116	647	1164	0	0	453	0	0	0	0	0
PD6733b	1085	486	1003	913	0	166	656	0	251	0	111	0
PD7066a	659	0	1868	535	0	276	298	0	0	0	0	0
PD7067a	817	82	1409	1708	0	1112	424	123	0	0	300	0
PD7069a	823	1015	198	934	0	605	1384	0	0	0	0	168
PD7199a	432	33	54	320	49	172	9	0	40	0	0	16
PD7201a	574	106	0	668	0	0	0	0	71	0	0	163
PD7202a	1608	339	0	1047	0	405	319	0	1032	0	0	388
PD7203a	218	211	0	592	0	0	320	0	220	0	0	0
PD7204a	704	188	0	839	0	307	0	0	0	0	0	135
PD7205a	822	972	0	2596	0	1243	2153	69	0	0	0	0
PD7206a	877	91	927	1317	0	1209	174	0	0	0	0	142
PD7207a	923	309	0	723	0	320	0	0	0	0	0	576
PD7209a	647	79	0	333	0	191	38	0	168	0	0	206
PD7210a	472	20	0	410	0	309	0	0	0	0	0	106
PD7211a	491	40	3951	695	255	2104	419	0	0	0	0	326
PD7214a	369	76	0	852	0	0	0	0	0	0	0	194
PD7215a	335	856	1124	806	111	1465	1202	0	0	0	0	482
PD7217a	650	631	3605	1454	0	1301	1301	142	0	0	80	0
PD7218a	483	50	0	459	104	202	0	0	173	0	0	0
PD7219a	419	4060	0	734	0	303	6037	0	65	0	0	0
PD7220a	953	429	0	980	0	0	220	0	0	0	0	125
PD7221a	790	362	0	388	0	290	207	0	0	0	0	0
PD7238a	732	319	0	561	0	262	34	0	0	0	0	307
PD7240a	1358	122	1499	1466	0	225	252	0	0	0	263	0
PD7243a	966	474	0	1634	0	2113	350	0	674	0	0	560
PD7248a	614	98	6501	2315	0	1816	1557	138	0	0	0	0
PD7249a	512	861	0	1264	156	886	903	0	0	0	0	0
PD7250a	608	0	5684	1300	0	0	296	0	0	0	0	0
PD7304a	479	167	278	669	0	328	79	0	0	0	0	0
PD7305a	1470	322	0	832	0	896	491	0	547	0	0	194
PD7306a	1445	609	0	1911	0	1187	592	297	367	0	0	451
PD7307a	343	2242	0	1499	0	787	3551	0	0	0	0	0
PD7316a	478	72	3596	181	0	1018	299	0	0	0	0	0
PD7321a	348	150	3000	970	235	398	951	0	0	0	0	0
PD7322a	662	42	0	644	0	305	0	0	359	0	0	0
PD7341a	744	236	508	606	0	366	460	22	144	0	0	0
PD7344a	196	0	0	317	0	149	58	0	0	0	0	0
PD7426a	351	0	9653	2613	0	0	5878	0	0	0	0	0
PD7428a	0	255	9417	0	630	3683	1205	0	0	0	758	0
PD8609a	691	2111	0	1224	0	0	1059	0	0	0	0	0
PD8610a	0	195	1607	872	251	1426	509	0	0	0	0	235
PD8611a	364	0	3521	1830	0	0	931	0	0	0	179	0
PD8612a	735	174	0	397	0	554	105	0	0	0	0	0
PD8614a	331	57	313	266	0	184	0	0	56	0	53	175
PD8615a	619	526	985	715	0	0	1421	0	0	0	0	0
PD8617a	400	43	0	969	0	303	23	0	0	0	31	126
PD8618a	398	65	0	989	0	0	52	0	0	0	0	0
PD8619a	856	104	833	1044	0	395	336	0	0	0	0	0
PD8620a	367	639	191	219	0	179	905	0	0	0	41	111
PD8621a	548	42	4241	1416	0	1004	566	30	0	0	211	0
PD8622a	392	59	0	838	0	294	77	0	0	0	0	145
PD8623a	439	283	0	954	0	342	0	0	0	0	0	0
PD8652a2	1056	292	8440	2307	0	1856	1637	0	0	0	266	0
PD8660a2	2488	1896	10404	7215	0	0	2985	1138	0	0	0	0
PD8828a	560	373	0	798	0	0	329	0	0	0	0	0
PD8830a	1464	116	4295	857	0	1148	144	0	137	0	81	0
PD8832a	265	238	13998	3544	951	6168	1003	238	0	0	0	0
PD8964a	755	238	5473	2101	0	1834	747	0	0	0	0	0
PD8965a	425	517	0	1915	0	1133	459	0	0	0	0	0
PD8969a	420	302	1907	1553	0	1231	1063	0	0	0	0	341
PD8973a	861	1427	0	832	0	454	2332	0	0	0	0	0
PD8977a	1953	159	0	1302	0	569	60	0	0	0	0	0
PD8978a	845	95	3178	1775	0	217	461	96	0	0	0	0
PD8979a	793	219	475	1357	0	530	213	92	0	0	0	354
PD8980a	515	569	4733	1635	0	5457	1450	0	0	0	0	1095
PD8981a	484	91	0	537	0	370	142	0	0	0	0	121
PD8982a	1105	874	12785	0	0	0	6791	0	0	0	0	0
PD8984a	1030	154	6289	541	0	0	1136	0	0	0	0	0
PD8995a	1989	2242	0	700	0	995	1659	0	0	0	0	0
PD8996a	1093	126	793	0	79	551	32	0	151	0	269	132
PD8997a	906	115	400	898	0	229	198	0	82	0	0	0
PD8998a	96	960	808	596	0	504	1767	0	0	0	0	35
PD8999a	412	59	0	593	0	281	0	0	0	0	0	0
PD9000a	265	284	3367	1905	0	2573	853	0	0	0	0	259
PD9001a	646	48	0	1479	0	278	43	0	0	0	0	207
PD9002a	484	238	1544	2191	0	1780	299	342	544	0	582	466
PD9004a	495	377	5681	2062	0	821	1186	0	0	0	0	0
PD9009a	956	2747	1562	839	0	1045	7607	450	0	0	0	0
PD9063a	604	29862	0	0	0	0	19287	0	0	0	0	290
PD9064a	416	271	4890	1666	274	3736	808	0	0	0	188	97
PD9065a	550	290	0	489	0	325	0	0	553	0	0	0
PD9067a	447	163	0	328	0	315	127	0	0	0	49	122
PD9193a	422	7	288	369	0	121	160	0	237	0	0	74
PD9464a	644	304	691	1094	0	1072	459	0	321	0	0	662
PD9467a	1068	175	0	490	0	557	59	0	0	0	0	111
PD9539a	2087	104	182	361	0	692	150	0	0	0	0	0
PD9541a	1271	280	0	673	0	457	22	0	0	0	0	0
PD9544a	434	103	0	506	0	343	0	0	0	0	0	0
PD9567a	925	197	0	1090	0	881	244	0	70	0	0	100
PD9568a	1433	928	13554	4427	0	5551	4499	0	0	0	0	0
PD9569a	648	0	0	1142	0	246	102	0	0	0	0	0
PD9570a	456	247	0	287	0	285	41	0	0	0	0	88
PD9571a	673	56	1683	1878	0	156	165	85	0	0	0	0
PD9572a	642	159	0	1752	0	466	1062	0	0	0	0	0
PD9573a	698	43	0	557	61	254	0	0	0	0	0	0
PD9574a	573	57	0	615	0	388	0	0	0	0	0	0
PD9575a	641	165	1467	3316	0	0	635	272	0	0	0	0
PD9576a	921	139	9830	2101	0	3859	535	0	0	0	450	0
PD9577a	440	35	0	562	0	429	30	0	0	0	0	125
PD9578a	306	35	0	575	0	152	19	0	0	0	0	0
PD9579a	390	60	0	772	0	332	77	0	0	0	0	0
PD9581a	411	0	0	685	0	321	35	0	0	0	0	161
PD9582a	1047	138	592	0	0	534	181	41	73	0	0	132
PD9584a	777	97	0	1346	0	285	69	0	50	0	0	124
PD9585a	676	81	3709	866	0	3161	1292	0	0	0	0	496
PD9589a	376	133	0	533	0	230	26	0	26	0	0	85
PD9591a	418	68	0	611	0	186	11	0	0	0	0	0
PD9592a	639	0	5035	781	0	1449	501	88	0	0	0	0
PD9593a	389	18	0	661	0	99	50	0	139	0	105	153
PD9595a	619	125	4684	972	387	2317	266	112	0	0	84	152
PD9597a	429	1208	0	377	0	0	804	0	0	0	0	91
PD9599a	1135	167	0	946	0	347	304	20	116	0	88	167
PD9600a	599	57	274	674	0	371	42	0	0	0	0	0
PD9604a	1462	0	0	0	0	664	170	0	0	0	8371	0
PD9605a	918	74	0	826	0	870	134	0	264	0	0	283
PD9606a	478	0	0	355	0	211	21	0	0	0	33	120
PD9694a	845	0	118	307	0	139	41	0	126	0	0	132
PD9696a	387	55	2598	649	0	1439	734	0	0	0	0	0
PD9702a	528	0	5186	1057	0	0	1088	0	0	0	0	0
PD9752a	1013	258	0	798	111	649	358	0	25	0	0	260
PD9754a	659	36	0	596	0	441	45	0	0	0	0	118
PD9755a	494	74	0	630	0	242	0	0	0	0	0	266
PD9756a	528	1358	265	811	0	245	1002	0	0	0	0	0
PD9759a	682	110	0	839	0	310	56	0	0	0	0	192
PD9760a	1157	556	881	982	0	655	627	0	0	0	0	144
PD9761a	705	76	0	536	0	332	24	0	101	0	0	326
PD9842a	681	0	0	1527	0	355	177	0	0	0	0	458
PD9843a	243	0	0	810	142	497	35	0	71	0	0	210
PD9844a	103	13	0	220	0	58	0	0	62	0	0	48
PD9845a	427	254	314	1759	0	0	143	0	0	0	0	246
PD9847a	430	0	0	1017	0	596	33	0	0	0	0	150
PD11353a	689	82	0	1095	263	440	33	0	122	0	0	116
PD11354a	1085	0	0	1028	0	528	65	0	0	0	0	0
PD11378a	579	36	0	816	0	478	0	0	86	0	0	322
PD12664a	551	0	311	717	152	496	158	0	0	0	0	265
PD13352a	393	66	0	747	0	317	0	0	0	0	0	201
PD13353a	756	158	0	923	0	328	169	0	0	0	0	217
PD13357a	747	673	371	904	0	0	1106	0	0	0	0	0
PD13358a	495	73	0	376	0	330	49	0	0	0	0	118
PD13359a	336	57	0	289	0	298	32	0	0	0	0	59
PD13632a	0	1638	6200	0	0	0	10801	0	0	0	0	0
PD13633a	1349	538	0	1431	0	792	566	0	0	0	0	0
PD13769a	509	6212	0	704	0	513	4779	0	0	0	0	0
PD14434a	114	86	1825	635	261	1419	439	0	0	0	262	113
PD14436a	612	180	0	1235	0	252	47	0	238	0	0	0
PD14443a	1019	308	0	1173	0	782	249	0	283	0	0	0
PD14444a	348	79	328	727	0	150	43	0	0	0	0	71
PD14445a	386	20	0	453	0	201	63	0	0	0	0	99
PD14446a	655	298	2652	586	0	1322	806	0	871	0	0	734
PD14447a	537	0	0	837	0	254	82	0	0	0	0	0
PD14449a	850	113	0	1048	0	537	107	0	53	0	0	243
PD14452a	629	148	1976	800	0	1179	340	0	0	0	0	0
PD14455a	694	21729	0	0	0	0	17471	0	0	0	0	0
PD14466a	701	303	294	973	0	896	286	0	81	0	0	281
PD14469a	1603	508	2562	2130	0	330	947	203	0	0	737	427
PD14470a	523	28	0	550	0	178	0	0	42	0	0	45
PD14474a	737	49	0	1393	0	859	167	0	0	0	0	0
PD17976a	864	0	0	635	0	274	62	0	0	0	0	0
PD17982a	516	53	0	544	0	200	0	0	0	0	0	90
PD17986a	263	24	1666	841	0	1158	168	0	0	0	0	132
PD17996a	867	165	0	742	0	587	128	0	0	0	0	0
PD18006a	327	49	0	795	0	354	0	0	0	0	0	0
PD18007a	521	61	3758	1641	304	1462	170	79	0	0	0	0
PD18008a	346	160	2610	1018	374	3823	643	0	1322	0	0	379
PD18010a	783	39	869	1013	0	153	51	304	118	0	196	109
PD18111a	393	0	0	583	89	314	37	0	0	0	0	155
PD18170a	857	459	619	675	0	175	427	42	0	0	187	207
PD18175a	1033	152	0	3740	0	1316	265	0	0	0	0	0
PD18178a	487	53	0	1099	0	355	38	0	101	0	0	266
PD18184a	2049	532	0	1951	0	883	0	0	295	0	0	730
PD18233a	300	482	1009	508	87	1091	375	33	87	0	0	257
PD18237a	0	933	4853	1605	0	6089	1648	0	0	0	0	788
PD18758a	423	24	0	829	0	0	40	0	0	0	0	83
PD18760a	705	0	0	249	0	308	50	0	222	0	0	0
PD18761a	311	65	0	645	0	242	44	0	0	0	0	0
PD18762a	340	58	0	612	0	194	0	0	0	0	98	0
PD18763a	418	80	0	481	0	298	0	0	0	0	0	119
PD18764a	346	37	0	436	0	162	0	0	0	0	0	0
PD18765a	673	50	284	1013	0	185	0	0	0	0	0	118
PD18772a	442	93	0	343	0	217	0	0	0	0	56	0
PD18777a	561	0	437	826	0	220	75	0	0	0	0	236
PD20341a	452	17	0	633	0	139	19	0	0	0	0	0
PD20342a	212	32	0	1021	186	481	40	0	0	0	0	119
PD20343a	494	56	0	567	0	536	61	0	648	0	0	149
PD20344a	550	129	3038	1403	0	1954	670	0	0	0	0	169
PD20345a	178	0	0	597	0	190	0	0	0	0	0	0
PD20347a	384	41	389	758	0	337	64	0	0	0	74	171
PD20348a	579	46	282	695	0	554	42	0	0	0	0	112
PD20400a	431	23	0	714	0	241	44	0	0	0	0	101
PD20401a	803	69	642	424	0	558	139	0	134	0	0	0
PD20403a	659	114	0	653	0	385	30	0	0	0	0	0
PD20404a	756	121	0	977	0	945	0	0	0	0	0	410
PD20405a	477	79	298	445	0	0	24	0	0	0	0	65
PD4075a	528	50	0	313	0	260	0	0	0	0	0	0
PD6700a2	1474	56	0	1384	0	0	0	0	72	0	0	0
PD6701a2	1140	65	573	1468	0	677	127	0	0	0	0	320
PD7239a	260	261	0	1517	0	361	69	129	0	0	0	229
PD7308a	1842	80	2104	1514	0	0	431	63	0	0	0	0
PD7310a	607	177	0	891	0	350	87	0	0	0	0	165
PD7311a	664	39	0	371	0	243	33	0	258	0	0	109
PD7314a	798	0	0	1159	0	291	39	0	0	0	0	0
PD7317a	537	196	366	673	0	318	27	0	0	0	0	148
PD7318a	3069	0	0	0	6041	184	0	0	0	3129	7010	1260
PD7319a	541	0	396	416	0	266	0	0	0	0	116	134
PD7454a	1470	67	297	1277	0	363	44	0	0	0	0	0
PD7455a	559	105	0	908	0	183	263	0	0	0	0	0
PD8823a	480	108	0	615	0	579	64	0	0	0	0	162
PD8826a	311	40	0	634	0	187	0	0	127	0	0	82
PD9066a	556	1268	0	780	0	304	516	0	0	0	0	177
PD9590a	215	82	0	357	0	267	103	0	0	0	0	100
PD9596a	295	46	0	1136	0	0	44	0	0	0	0	0

## Sheet: (b)12Sigs_alpha0.01
(b) Exposure in 640 breast cancer WGS using twelve consensus signatures alpha 0.01
Sample	Signature.1	Signature.2	Signature.3	Signature.5	Signature.6	Signature.8	Signature.13	Signature.17	Signature.18	Signature.20	Signature.26	Signature.30
PD10010a	489	0	0	1133	0	387	195	0	0	0	0	224
PD10011a	699	0	3865	3056	0	0	0	651	0	0	0	0
PD10014a	0	0	4048	3462	0	4202	411	0	0	0	0	0
PD11326a	0	0	4145	1864	0	2822	795	0	0	0	0	0
PD11327a	0	0	7073	0	0	4892	748	0	0	0	0	0
PD11336a	1372	663	0	1740	0	1371	0	436	0	0	0	0
PD11337a	720	240	0	853	0	938	319	0	0	0	0	0
PD11338a	729	0	0	1130	0	439	0	0	0	0	0	0
PD11339a	1138	0	0	1390	0	0	0	0	0	0	0	0
PD11340a	888	290	0	1542	0	1303	348	0	0	0	0	689
PD11341a	492	297	0	399	0	463	0	0	0	0	0	0
PD11342a	674	812	0	1516	0	0	301	0	0	0	0	0
PD11343a	731	129	0	1170	0	780	132	0	0	0	0	0
PD11344a	0	4524	0	0	0	0	6503	0	0	0	0	0
PD11345a	0	4160	0	3739	0	0	2451	0	0	0	0	0
PD11346a	500	396	0	1156	0	0	238	0	0	0	0	0
PD11347a	493	355	0	1048	0	0	133	0	0	0	0	0
PD11348a	1611	289	0	1338	0	1770	0	0	0	0	0	0
PD11349a	975	910	0	2967	0	1655	939	0	0	0	0	0
PD11352a	801	409	0	1374	0	0	0	0	0	0	0	0
PD11355a	475	0	0	625	0	447	0	0	289	0	0	0
PD11357a	1259	0	0	1515	0	604	0	0	0	0	0	0
PD11358a	906	1471	0	1948	0	0	0	0	0	0	0	0
PD11359a	788	161	0	1168	0	548	0	0	0	0	0	0
PD11360a	1009	147	0	1302	0	656	0	0	0	0	0	0
PD11361a	714	120	0	887	0	0	0	0	0	0	0	0
PD11364a	704	62	0	1428	0	0	142	0	0	0	0	0
PD11365a	0	0	0	4654	0	0	0	0	0	0	8997	0
PD11366a	818	132	0	1519	0	534	0	0	0	0	0	0
PD11367a	1128	0	2576	1639	0	2467	351	0	0	0	0	0
PD11368a	1339	1723	0	3241	0	0	523	0	0	0	0	0
PD11369a	1701	708	0	3156	0	0	567	0	0	0	0	0
PD11370a	363	0	0	915	0	0	0	0	0	0	0	0
PD11372a	0	4426	0	0	0	0	9366	0	0	0	0	0
PD11374a	652	0	0	1401	0	0	75	0	0	0	0	253
PD11375a	808	0	0	682	0	442	0	0	0	0	0	0
PD11376a	1051	125	0	1332	0	643	0	0	0	0	0	0
PD11379a	0	6809	0	0	0	0	12572	0	0	0	0	0
PD11380a	708	245	0	1766	0	0	0	0	0	0	0	0
PD11381a	398	77	0	1621	0	0	0	0	0	0	0	0
PD11383a	572	0	0	1292	0	621	92	0	0	0	0	0
PD11384a	586	143	0	898	0	0	97	0	0	0	0	0
PD11385a	506	0	0	802	0	377	0	0	0	0	0	200
PD11386a	763	528	0	1911	0	0	178	0	0	0	0	0
PD11388a	1371	0	0	1297	0	1399	295	0	0	0	0	625
PD11389a	399	0	0	917	0	359	0	0	0	0	0	0
PD11391a	232	0	0	924	0	0	0	0	0	0	0	116
PD11393a	1753	0	0	0	0	1717	219	0	978	0	0	0
PD11394a	1329	0	0	879	0	0	0	0	0	0	0	0
PD11395a	888	116	0	1387	0	1102	0	298	0	0	0	0
PD11396a	667	0	0	767	0	662	63	0	0	0	0	274
PD11397a	1265	184	0	1258	0	1206	389	0	523	0	0	0
PD11398a	651	0	555	608	0	531	0	0	0	0	0	0
PD11399a	1171	370	0	1717	0	0	0	0	236	0	0	0
PD11402a	797	161	0	1677	0	0	0	0	0	0	0	0
PD11462a	1025	0	0	965	0	708	139	0	0	0	0	0
PD11464a	646	1055	1158	0	0	0	1636	0	0	0	0	0
PD11465a	0	5037	0	10284	0	0	7229	0	0	0	0	0
PD11740a	667	0	0	1159	0	506	0	0	0	0	0	0
PD11741a	464	103	0	0	0	936	124	0	346	0	0	0
PD11742a	0	384	2050	1761	0	1838	969	0	0	0	0	0
PD11743a	706	82	975	949	0	595	0	0	0	0	0	0
PD11744a	539	0	0	1342	0	0	0	0	0	0	0	0
PD11745a	513	226	0	860	0	1212	205	0	0	0	0	0
PD11748a	1172	0	7360	0	0	2777	450	0	0	0	0	0
PD11750a	0	0	7415	0	0	0	2662	0	0	0	0	0
PD11751a	1061	527	12959	0	0	0	2099	0	0	0	0	0
PD11752a	2499	0	0	3091	0	1358	0	0	686	0	0	0
PD11753a	1040	226	2624	2517	0	0	0	448	0	0	0	0
PD11755a	306	0	1542	778	0	0	148	0	0	0	0	0
PD11756a	647	236	0	887	0	0	0	0	0	0	0	0
PD11757a	148	0	1339	0	0	0	463	0	0	0	0	0
PD11760a	1555	0	0	1423	0	0	0	0	1112	0	0	0
PD11761a	401	276	0	1521	0	507	0	0	0	0	0	0
PD11762a	442	208	0	1082	0	0	0	0	0	0	0	0
PD11765a	401	60	0	1467	0	0	72	0	0	0	0	0
PD11766a	325	108	0	1106	0	0	154	0	0	0	0	0
PD11767a	213	0	0	386	0	269	0	0	0	0	0	0
PD11769a	681	124	0	915	0	0	0	0	0	0	0	0
PD11816a	481	491	0	2319	0	0	719	0	0	0	0	0
PD11818a	412	0	0	930	0	0	78	0	0	0	0	183
PD11819a	455	0	482	748	0	0	0	0	0	0	0	0
PD13162a	0	481	0	2748	0	0	2174	0	0	0	0	0
PD13163a	907	737	0	2974	0	0	733	0	0	0	0	0
PD13164a	610	97	0	1220	0	669	124	0	0	0	0	0
PD13165a	906	1261	0	2613	0	0	635	0	924	0	0	0
PD13166a	573	173	0	727	0	560	294	0	0	0	0	0
PD13167a	811	141	0	1279	0	0	172	0	0	0	0	0
PD13168a	875	384	0	1133	0	0	134	0	0	0	0	0
PD13296a	1697	0	11808	0	0	3074	2000	0	0	0	0	0
PD13297a	0	0	6094	0	0	0	1087	0	0	0	0	7800
PD13298a	1280	0	0	3328	0	2925	832	0	0	0	0	0
PD13299a	0	986	5844	0	0	0	3903	0	0	0	0	0
PD13302a	1513	346	0	2028	0	1007	0	0	0	0	0	0
PD13304a	638	0	0	550	0	327	0	0	0	0	0	0
PD13306a	528	319	0	1178	0	0	0	0	0	0	0	0
PD13307a	958	1890	0	1497	0	0	1007	0	0	0	0	0
PD13310a	757	0	0	1073	0	0	0	0	0	0	0	0
PD13311a	0	0	2556	1082	0	711	159	0	0	0	0	0
PD13312a	450	0	0	1524	0	0	58	0	0	0	0	0
PD13416a	622	0	0	649	0	406	0	0	0	0	0	260
PD13418a	1367	1141	2299	0	0	0	1999	0	0	0	0	0
PD13419a	314	71	0	705	0	0	0	0	0	0	0	0
PD13420a	603	0	0	1219	0	0	39	0	0	0	0	0
PD13422a	544	72	0	660	0	367	0	0	159	0	0	0
PD13424a	1279	109	0	1118	0	1257	189	0	0	0	0	0
PD13425a	0	5599	10910	0	0	0	17992	0	0	0	0	0
PD13426a	776	129	0	1793	0	0	0	0	0	0	0	0
PD13427a	350	0	0	783	0	0	0	0	0	0	0	0
PD13428a	686	0	0	2131	0	0	135	0	0	0	0	468
PD13602a	1153	0	2207	1806	0	0	347	0	399	0	0	0
PD13603a	717	233	0	995	0	741	376	0	0	0	0	0
PD13604a	0	47819	0	0	0	0	45282	0	0	0	0	0
PD13605a	373	0	0	575	0	239	48	0	0	0	0	0
PD13606a	1429	434	0	1838	0	1574	0	0	615	0	0	0
PD13607a	870	235	0	1885	0	0	296	0	0	0	0	0
PD13608a	810	714	0	1457	0	0	1124	0	0	0	0	0
PD13609a	0	1196	0	1515	0	0	1993	0	0	0	0	0
PD13618a	482	229	0	1120	0	0	0	0	0	0	0	0
PD13619a	604	76	0	1431	0	0	0	0	0	0	0	0
PD13620a	1422	0	0	1655	0	1197	322	0	0	0	0	0
PD13622a	1275	0	0	1434	0	939	0	0	704	0	0	0
PD13623a	0	1473	0	2021	0	0	305	0	0	0	0	0
PD13625a	2271	879	0	0	0	4999	0	3088	0	0	0	0
PD13626a	333	0	0	698	0	0	44	0	0	0	0	0
PD13627a	565	0	7295	0	0	0	581	0	0	0	0	0
PD13629a	529	404	0	1095	0	0	0	0	0	0	0	0
PD13630a	681	557	0	2078	0	0	789	0	0	0	0	0
PD13631a	526	159	0	1616	0	0	121	0	180	0	0	0
PD13752a	531	124	0	1115	0	770	0	0	0	0	0	267
PD13753a	0	2364	0	1914	0	0	3716	0	0	0	0	0
PD13754a	670	0	0	1735	0	0	100	0	0	0	0	0
PD13755a	579	68	0	1288	0	0	0	0	0	0	0	0
PD13756a	520	0	0	1117	0	445	0	0	0	0	0	0
PD13757a	358	344	0	632	0	0	150	0	0	0	0	0
PD13758a	350	0	0	1635	0	0	0	0	0	0	0	312
PD13760a	475	164	1965	0	0	1387	640	0	0	0	0	0
PD13761a	327	0	0	837	0	262	0	0	0	0	0	260
PD13762a	489	0	0	617	0	374	0	0	0	0	0	170
PD13763a	834	140	0	907	0	681	0	0	0	0	0	0
PD13764a	687	232	0	2478	0	1037	393	0	0	0	0	0
PD13765a	1186	0	0	0	0	1472	0	0	2000	0	0	819
PD13766a	0	1581	0	1494	0	0	761	0	0	0	0	0
PD13767a	584	258	0	968	0	494	0	0	0	0	0	332
PD13768a	524	0	0	827	0	0	0	0	0	0	0	0
PD13770a	590	146	0	1104	0	0	0	0	238	0	0	0
PD13771a	0	0	4675	0	0	4844	1675	0	0	0	0	1892
PD14432a	403	0	0	804	0	397	0	0	0	0	0	265
PD14433a	810	1228	0	1217	0	0	325	0	0	0	0	0
PD14435a	1188	234	0	2019	0	0	273	0	0	0	0	0
PD14437a	1020	0	0	1851	0	1016	475	0	0	0	0	0
PD14439a	404	52	0	703	0	0	0	0	155	0	0	0
PD14441a	391	0	976	1521	0	1500	272	0	0	0	0	0
PD14442a	447	0	0	899	0	398	0	0	0	0	0	0
PD14450a	286	0	0	957	0	0	54	0	0	0	0	0
PD14453a	924	2100	4560	0	0	0	2329	0	0	0	0	0
PD14454a	576	123	0	1064	0	574	169	0	0	0	0	0
PD14456a	742	0	0	1069	0	0	0	0	164	0	0	0
PD14457a	1188	291	0	2283	0	0	0	0	802	0	0	0
PD14458a	534	0	0	443	0	348	0	0	0	0	0	187
PD14459a	651	102	0	947	0	0	0	0	384	0	0	0
PD14460a	931	2704	0	0	0	0	888	0	0	0	0	0
PD14461a	524	0	0	911	0	0	0	0	0	0	0	0
PD14462a	751	357	0	1246	0	0	272	0	0	0	0	0
PD14465a	969	196	0	1298	0	632	0	0	0	0	0	0
PD14467a	620	74	0	849	0	0	79	0	0	0	0	0
PD14468a	571	65	0	912	0	0	0	0	0	0	0	0
PD14471a	1320	0	0	1039	0	762	146	0	0	0	0	0
PD14472a	573	178	0	1429	0	0	115	0	0	0	0	0
PD14473a	589	0	0	335	0	425	0	0	0	0	0	192
PD17973a	556	0	0	932	0	0	0	0	536	0	0	0
PD17981a	2443	1272	0	1963	0	0	0	0	1284	0	0	0
PD17991a	515	59	0	647	0	0	0	0	0	0	0	0
PD17994a	443	216	0	588	0	0	57	0	0	0	0	0
PD18017a	429	154	0	1524	0	0	0	0	0	0	0	0
PD18020a	0	0	9316	0	0	4156	4298	0	0	0	0	0
PD18022a	522	104	0	845	0	0	129	0	0	0	0	0
PD18024a	623	0	7618	0	0	2340	521	0	0	0	0	0
PD18031a	784	100	0	1240	0	413	230	0	0	0	0	0
PD18037a	2985	391	0	2594	0	0	0	0	0	0	0	0
PD18045a	0	3730	0	6728	0	0	9008	0	0	0	0	0
PD18046a	898	109	0	1190	0	702	0	0	0	0	0	0
PD18047a	817	162	0	927	0	436	0	0	0	0	0	0
PD18048a	1199	0	0	3248	0	0	338	0	0	0	0	0
PD18049a	887	454	0	1838	0	0	212	0	0	0	0	0
PD18050a	1399	329	0	1564	0	0	272	0	0	0	0	0
PD18100a	386	149	0	504	0	490	0	0	0	0	0	0
PD18101a	320	0	0	496	0	0	46	0	0	0	0	0
PD18116a	465	77	0	943	0	0	56	0	0	0	0	0
PD18149a	551	112	413	1492	0	0	0	0	0	0	0	0
PD18188a	613	144	0	1477	0	0	0	0	0	0	0	0
PD18189a	704	477	0	2372	0	0	286	0	430	0	0	0
PD18247a	0	3570	0	0	0	0	5565	0	0	0	0	0
PD18251a	621	157	1314	1394	0	0	0	0	0	0	0	0
PD18257a	622	260	0	805	0	862	422	0	0	0	0	0
PD18258a	405	0	0	526	0	210	0	0	0	0	0	0
PD18259a	871	400	2336	0	0	2534	495	0	0	0	0	0
PD18264a	0	3376	0	1673	0	0	1630	0	0	0	0	0
PD18269a	381	0	0	1005	0	0	0	0	0	0	0	0
PD18728a	397	220	0	1151	0	0	0	0	0	0	0	0
PD18730a	369	498	0	468	0	0	564	0	0	0	0	0
PD18733a	544	257	0	1492	0	723	0	0	0	0	0	0
PD18734a	1016	227	0	1037	0	1222	0	0	323	0	0	0
PD18748a	944	782	0	1230	0	0	0	0	0	0	0	0
PD18749a	0	925	0	1395	0	0	2339	0	0	0	0	0
PD18751a	733	0	0	372	0	547	0	0	0	0	0	252
PD18754a	677	709	0	930	0	0	275	0	0	0	0	0
PD18756a	673	52	0	801	0	0	0	0	108	0	0	0
PD18768a	590	134	0	1830	0	0	0	0	0	0	0	0
PD18769a	0	498	0	1245	0	0	1237	0	0	0	0	0
PD18771a	541	0	0	1234	0	0	0	0	0	0	0	0
PD18775a	419	50	0	741	0	0	0	0	0	0	0	118
PD18776a	545	0	0	1083	0	0	0	0	0	0	0	0
PD22036a	270	0	0	776	0	0	0	0	0	0	0	0
PD22251a	552	86	0	865	0	0	0	0	0	0	0	0
PD22355a	1084	0	4421	0	0	3815	439	0	0	0	0	0
PD22357a	0	2225	0	3172	0	0	2320	0	0	0	0	0
PD22358a	0	0	3187	2091	0	0	878	0	0	0	0	0
PD22359a	431	196	0	1022	0	0	0	0	0	0	0	166
PD22360a	0	0	5266	0	0	2510	732	0	0	0	0	0
PD22361a	0	1363	0	2417	0	0	2118	0	0	0	0	0
PD22362a	252	286	0	490	0	573	104	0	0	0	0	240
PD22363a	0	0	5228	0	504	2885	286	0	0	0	0	0
PD22364a	808	484	0	792	0	0	316	0	0	0	0	0
PD22365a	288	0	499	575	0	543	0	0	0	0	0	0
PD22366a	529	365	7381	0	0	0	1532	0	0	0	0	0
PD23550a	743	560	0	1561	0	0	0	0	0	0	0	0
PD23554a	0	0	4126	0	0	2314	458	0	0	0	0	0
PD23558a	715	369	6176	0	0	2279	592	0	0	0	0	0
PD23559a	602	232	2469	1706	0	0	370	0	0	0	0	0
PD23560a	517	210	0	1878	0	0	398	0	0	0	0	0
PD23561a	0	16982	0	0	11674	0	29371	0	0	0	0	0
PD23562a	664	0	3940	2118	0	0	624	0	0	0	0	0
PD23563a	0	0	4164	0	0	3741	317	0	0	0	0	0
PD23564a	23012	0	0	0	38836	0	0	0	0	0	21597	0
PD23565a	1477	2670	0	0	0	2192	2511	0	0	0	0	0
PD23566a	523	0	4297	0	0	1845	0	0	0	0	0	0
PD23567a	632	0	3965	0	0	2599	0	0	0	0	0	0
PD23569a	91	0	293	415	0	205	48	0	0	0	0	0
PD23570a	368	586	0	984	0	0	304	0	0	0	0	0
PD23574a	979	0	9741	0	0	0	2373	0	0	0	0	0
PD23577a	345	0	2234	1223	0	0	166	0	0	0	0	0
PD23578a	0	0	3142	1140	0	2316	240	0	0	0	0	0
PD23579a	0	0	0	36233	20876	0	0	0	0	30201	0	0
PD24182a	0	0	4279	3198	0	0	2059	0	0	0	0	0
PD24186a	0	0	3436	2143	0	1635	272	0	0	0	0	0
PD24189a	0	0	0	11879	9239	0	0	0	0	0	8470	0
PD24190a	0	0	0	3901	0	3026	751	2129	0	0	0	0
PD24191a	311	0	4103	1705	0	0	0	0	0	0	0	0
PD24192a	0	0	9860	6204	0	0	1762	0	0	0	0	0
PD24193a	0	0	0	0	3287	2330	410	0	0	0	3726	1481
PD24194a	0	5323	0	2929	0	0	5441	0	0	0	0	0
PD24195a	409	73	0	1347	0	408	0	0	0	0	0	0
PD24196a	362	122	0	642	0	1239	252	0	0	0	0	0
PD24197a	0	0	10114	0	0	10100	0	0	0	0	0	0
PD24199a	509	148	680	1307	0	0	209	0	0	0	0	0
PD24200a	64	0	619	0	0	290	0	0	0	0	0	0
PD24201a	0	402	5296	5183	0	8410	1184	0	0	0	0	0
PD24202a	813	0	4254	0	0	1818	891	0	0	0	0	0
PD24204a	1478	0	0	978	0	0	0	0	337	0	0	0
PD24205a	0	0	3088	1812	0	2645	423	0	0	0	0	958
PD24206a	0	304	0	1882	0	1208	215	0	0	0	0	0
PD24207a	1120	1173	0	1421	0	0	1029	0	0	0	0	0
PD24208a	0	15685	0	0	0	0	9938	0	0	0	0	0
PD24209a	0	1956	3294	0	0	0	4918	0	0	0	0	0
PD24212a	0	0	2735	1678	0	4091	533	0	0	0	0	1016
PD24214a	1295	0	0	1356	0	0	0	0	427	0	0	0
PD24215a	0	0	0	3083	0	2503	589	0	0	0	0	0
PD24216a	0	2810	0	3852	0	0	2676	0	0	0	0	0
PD24217a	0	4158	0	0	0	0	11146	0	0	0	0	0
PD24218a	422	193	0	2671	0	0	0	0	0	0	0	0
PD24219a	1717	0	0	1601	0	0	0	0	0	0	0	0
PD24220a	1247	189	0	1412	0	0	761	0	0	0	0	0
PD24221a	0	0	0	1414	0	755	123	0	0	0	0	0
PD24223a	857	882	0	1687	0	0	0	0	0	0	0	0
PD24224a	566	120	0	902	0	517	105	0	0	0	0	0
PD24225a	290	374	0	946	0	0	209	0	0	0	0	0
PD24302a	393	86	0	788	0	0	0	0	0	0	0	0
PD24303a	0	0	2234	1661	0	0	604	0	0	0	0	0
PD24304a	0	0	3215	0	0	3637	0	0	0	0	0	0
PD24306a	0	0	1389	614	0	1152	179	0	0	0	0	0
PD24307a	346	95	0	1151	0	0	0	0	0	0	0	0
PD24308a	647	0	0	3718	0	0	385	0	0	0	0	0
PD24314a	809	0	993	1548	0	0	148	0	370	0	0	0
PD24318a	642	0	0	1800	0	0	102	0	0	0	0	0
PD24320a	1347	0	0	0	0	0	0	0	0	0	14347	0
PD24322a	919	638	0	2440	0	0	869	0	0	0	0	0
PD24325a	1255	0	3462	4208	0	0	1460	0	0	0	0	0
PD24326a	0	12731	0	0	0	0	10888	0	0	0	0	0
PD24327a	0	6055	0	3086	0	0	7043	0	0	0	0	0
PD24329a	920	181	0	425	0	584	0	0	0	0	0	0
PD24332a	750	144	0	533	0	491	0	0	0	0	0	0
PD24333a	0	0	0	0	0	0	0	22884	0	0	0	0
PD24335a	1482	181	0	1985	0	0	299	0	0	0	0	0
PD24336a	0	309	0	1953	0	825	249	0	0	0	0	0
PD24337a	463	0	3870	0	0	1079	293	0	0	0	0	0
PD3851a	411	124	0	621	0	660	0	0	0	0	0	0
PD3890a	0	159	3028	1620	0	0	775	0	0	0	0	0
PD3904a	0	296	2264	0	0	1896	451	0	0	0	0	759
PD3905a	0	198	1756	1155	0	964	527	0	0	0	0	0
PD3945a	0	0	3355	3196	0	3417	581	0	0	0	0	0
PD3989a	731	265	0	1241	0	0	0	0	0	0	0	0
PD4005a	0	663	3763	0	0	0	1613	0	0	0	0	0
PD4006a	698	0	6557	0	0	2319	0	0	0	0	0	0
PD4069a	781	51	0	1001	0	0	0	0	250	0	0	0
PD4072a	0	13802	0	0	0	0	14128	0	0	0	0	0
PD4076a	696	265	0	1129	0	0	0	0	0	0	0	0
PD4085a	612	164	0	1098	0	828	0	0	0	0	0	0
PD4086a	259	212	0	1041	0	0	438	0	0	0	0	0
PD4088a	660	99	688	0	0	0	0	0	241	0	0	0
PD4103a	1222	623	0	1756	0	1006	609	0	0	0	0	0
PD4107a	0	928	3806	2079	0	3060	0	0	0	0	0	0
PD4109a	1811	515	0	6156	0	0	1828	0	0	0	0	0
PD4115a	462	0	3560	2706	0	2643	380	0	0	0	0	0
PD4116a	0	264	4700	0	0	2323	880	0	0	0	0	0
PD4192a	627	202	2858	0	0	0	603	0	0	0	0	0
PD4194a	419	112	0	696	0	0	198	0	0	0	0	0
PD4198a	1121	612	0	2522	0	0	260	0	0	0	0	0
PD4199a	0	2593	1874	0	0	0	2480	0	0	0	0	0
PD4225a	985	144	0	825	0	0	0	0	0	0	0	0
PD4248a	317	93	0	1136	0	508	140	0	0	0	0	0
PD4252a	1000	0	0	2167	0	0	131	0	473	0	0	0
PD4255a	733	0	0	2862	0	0	232	0	725	0	0	0
PD4261a	470	0	0	1325	0	0	0	0	0	0	0	0
PD4264a	929	249	0	939	0	0	0	0	0	0	0	0
PD4266a	347	798	0	864	0	0	377	0	0	0	0	0
PD4267a	658	127	0	871	0	0	461	0	0	0	0	0
PD4315a	666	511	0	1111	0	676	422	0	0	0	0	0
PD4604a	0	0	2990	2202	0	2914	580	0	0	0	0	635
PD4605a	1032	0	0	1389	0	0	227	0	0	0	0	0
PD4606a	387	0	0	741	0	0	0	0	0	0	0	0
PD4607a	0	16125	0	0	0	0	9827	0	0	0	0	0
PD4613a	373	631	0	689	0	0	500	0	0	0	0	0
PD4826a	746	529	0	1932	0	0	609	0	0	0	0	0
PD4833a	401	0	4375	1134	0	0	489	0	0	0	0	0
PD4836a	664	85	1295	1956	0	0	301	0	0	0	0	0
PD4841a	646	0	2504	1860	0	1724	284	0	0	0	0	0
PD4844a	616	0	8004	3210	0	0	978	0	0	0	0	0
PD4845a	592	0	2768	0	0	1592	0	781	0	0	0	0
PD4847a	1085	401	0	4695	0	4220	0	639	0	0	0	0
PD4872a	0	414	1505	0	0	1636	727	0	0	0	0	526
PD4874a	0	714	0	4166	0	2578	2249	0	0	0	0	0
PD4875a	679	0	2045	2079	0	1695	304	0	0	0	0	0
PD4876a	0	213	2972	1276	0	0	446	0	0	0	0	0
PD4951a	273	0	923	708	0	647	225	0	0	0	0	0
PD4952a	1000	491	4015	2682	0	2937	904	0	0	0	0	0
PD4953a	0	0	3013	1223	0	1590	394	0	0	0	0	723
PD4954a	420	200	3488	1219	0	0	434	0	0	0	0	0
PD4955a	0	0	1777	1384	0	1927	447	0	0	0	0	532
PD4956a	760	0	9411	0	0	0	1410	0	0	0	0	0
PD4957a	300	196	0	1638	0	870	272	0	0	0	0	0
PD4958a	0	506	0	5251	0	2849	730	0	0	0	0	0
PD4959a	532	0	2095	0	0	1571	0	0	0	0	0	411
PD4962a	0	1519	0	0	0	2724	2599	0	0	0	0	0
PD4965a	722	113	0	1252	0	617	0	0	0	0	0	0
PD4967a	530	565	0	1276	0	0	855	0	0	0	0	0
PD4968a	1307	1023	0	2448	0	0	0	0	0	0	0	0
PD4969a	244	53	0	528	0	205	0	0	0	0	0	0
PD4970a	649	82	0	1553	0	0	123	0	0	0	0	0
PD4971a	973	0	0	876	0	725	189	0	0	0	0	0
PD4972a	340	0	0	772	0	0	32	0	0	0	0	0
PD4975a	638	0	4038	2492	0	0	336	0	0	0	0	0
PD4976a	1915	0	0	3269	0	0	570	0	519	0	0	0
PD4977a	0	25047	0	0	0	0	17210	0	0	0	0	0
PD4978a	603	544	0	1912	0	0	675	0	0	0	0	0
PD4980a	685	0	0	1306	0	1094	172	0	537	0	0	0
PD4981a	621	0	0	426	0	405	0	0	0	0	0	209
PD4982a	589	0	0	884	0	0	0	0	0	0	0	0
PD4983a	389	71	0	1301	0	0	0	0	0	0	0	0
PD4985a	513	119	0	1370	0	0	0	0	0	0	0	0
PD4986a	417	0	433	1124	0	0	0	0	0	0	0	0
PD5925a	0	260	4761	2538	0	0	1220	0	0	0	0	0
PD5928a	530	469	3729	0	0	2384	0	0	0	0	0	0
PD5930a	353	0	3136	0	0	0	456	0	0	0	0	0
PD5932a	0	0	5664	2653	0	0	1742	0	0	0	0	0
PD5934a	813	0	7271	0	0	3494	0	0	0	0	0	0
PD5935a	916	0	7612	0	0	0	1141	0	0	0	0	0
PD5936a	745	252	0	1783	0	0	0	0	0	0	0	0
PD5937a	0	26190	0	0	11610	0	17991	0	0	20304	0	0
PD5942a	1313	141	2138	2034	0	0	362	0	0	0	0	0
PD5944a	801	76	0	1160	0	570	0	0	0	0	0	0
PD5945a	0	0	5530	0	0	2839	463	0	0	0	0	0
PD5946a	1321	144	0	1999	0	0	146	0	300	0	0	0
PD5947a	495	176	0	519	0	367	219	0	0	0	0	0
PD5948a	640	0	12340	0	0	0	0	0	0	0	2190	0
PD5950a	919	0	0	1032	0	0	0	0	237	0	0	0
PD5951a	1391	217	0	1583	0	0	0	0	0	0	0	0
PD5953a	714	0	0	1421	0	0	0	0	0	0	0	0
PD5956a	665	117	0	0	0	2527	0	0	407	0	0	368
PD5959a	576	308	0	1619	0	0	0	0	0	0	0	0
PD5960a	0	93	969	1147	449	1212	173	0	0	0	0	0
PD5961a	693	224	0	863	0	0	0	0	177	0	0	354
PD5964a	385	117	0	510	0	508	68	0	0	0	0	0
PD6016a2	501	394	0	808	0	0	206	0	0	0	0	0
PD6041a	553	0	0	1217	0	0	0	0	0	0	0	0
PD6042a	0	533	0	3745	0	1730	1109	0	0	0	0	0
PD6043a	0	6607	0	0	0	8679	7476	0	0	0	0	0
PD6044a	660	0	0	1748	0	0	163	0	0	0	0	0
PD6045a	374	528	0	1238	0	0	191	0	0	0	0	0
PD6046a	846	179	0	1099	0	499	0	0	350	0	0	0
PD6047a	2040	621	1733	4031	0	0	0	0	1015	0	0	0
PD6048a	986	0	0	0	0	1063	211	0	241	0	0	599
PD6404a	749	277	2997	2002	0	0	525	0	0	0	0	0
PD6405a	0	6063	0	0	0	0	29253	0	0	0	0	0
PD6406a	304	0	3565	0	0	810	345	0	0	0	0	0
PD6409a	0	0	4382	0	0	3325	1101	0	0	0	0	0
PD6410a	430	0	4892	1126	0	0	863	0	0	0	0	0
PD6411a	406	0	5680	0	0	0	587	0	0	0	0	0
PD6412a	0	0	0	0	8980	8789	0	0	0	0	7416	0
PD6413a	269	261	2219	0	0	1197	640	0	0	0	0	0
PD6414a	381	151	0	1228	0	0	0	0	0	0	0	0
PD6415a	0	548	3779	3629	0	0	1588	0	0	0	0	0
PD6416a	0	108	1613	0	0	920	410	278	0	0	0	0
PD6417a	737	0	0	703	0	0	105	0	0	0	0	0
PD6418a	547	51	0	1421	0	0	0	0	0	0	0	0
PD6422a	875	343	0	2327	0	1422	212	0	0	0	0	0
PD6466b	522	165	0	1121	0	0	0	0	0	0	0	0
PD6684a	0	0	7421	3448	0	0	2807	0	0	0	0	0
PD6711a2	676	105	0	1131	0	0	0	0	0	0	0	0
PD6719a	776	0	3091	0	0	1102	0	0	0	0	0	0
PD6720a	630	91	0	1207	0	0	88	0	0	0	0	0
PD6721a	789	228	0	1213	0	0	0	0	0	0	0	0
PD6722a	0	1924	0	3206	0	0	4979	0	0	0	0	0
PD6727b	1680	239	3637	0	0	0	1121	0	0	0	0	0
PD6728b	483	0	723	470	0	739	160	0	0	0	0	0
PD6729a2	1028	0	2143	1516	0	0	182	0	0	0	0	0
PD6730b	662	0	6836	0	0	2200	389	0	0	0	0	0
PD6731a2	0	1110	4654	0	0	0	2783	0	0	0	0	0
PD6732b	581	109	0	1759	0	0	464	0	0	0	0	0
PD6733b	1073	481	0	2469	0	0	652	0	0	0	0	0
PD7066a	659	0	2698	0	0	0	279	0	0	0	0	0
PD7067a	817	0	1409	2132	0	1112	507	0	0	0	0	0
PD7069a	823	1015	0	1908	0	0	1384	0	0	0	0	0
PD7199a	482	32	0	615	0	0	0	0	0	0	0	0
PD7201a	553	160	0	870	0	0	0	0	0	0	0	0
PD7202a	1650	348	0	1887	0	0	313	0	940	0	0	0
PD7203a	218	211	0	592	0	0	320	0	220	0	0	0
PD7204a	693	179	0	1302	0	0	0	0	0	0	0	0
PD7205a	822	972	0	3908	0	0	2153	0	0	0	0	0
PD7206a	850	0	0	2251	0	1373	264	0	0	0	0	0
PD7207a	929	315	0	1061	0	0	0	0	0	0	0	547
PD7209a	647	79	0	769	0	0	0	0	168	0	0	0
PD7210a	486	0	0	538	0	293	0	0	0	0	0	0
PD7211a	746	0	5014	0	0	2104	419	0	0	0	0	0
PD7214a	362	78	0	1052	0	0	0	0	0	0	0	0
PD7215a	0	856	1961	0	0	1472	1194	0	0	0	0	898
PD7217a	0	631	3605	3630	0	0	1301	0	0	0	0	0
PD7218a	587	0	0	662	0	0	0	0	223	0	0	0
PD7219a	0	4054	0	0	0	0	7566	0	0	0	0	0
PD7220a	894	407	0	1184	0	0	222	0	0	0	0	0
PD7221a	790	362	0	679	0	0	207	0	0	0	0	0
PD7238a	730	328	0	1157	0	0	0	0	0	0	0	0
PD7240a	1358	0	1499	2077	0	0	252	0	0	0	0	0
PD7243a	966	474	0	2195	0	2113	350	0	674	0	0	0
PD7248a	0	0	6510	4980	0	0	1551	0	0	0	0	0
PD7249a	659	861	0	2157	0	0	906	0	0	0	0	0
PD7250a	905	0	6984	0	0	0	0	0	0	0	0	0
PD7304a	478	166	0	680	0	596	80	0	0	0	0	0
PD7305a	1481	350	0	1886	0	0	490	0	545	0	0	0
PD7306a	1420	648	0	2583	0	1613	597	0	0	0	0	0
PD7307a	0	2242	0	2629	0	0	3551	0	0	0	0	0
PD7316a	418	0	3843	0	0	1059	324	0	0	0	0	0
PD7321a	587	0	4508	0	0	0	958	0	0	0	0	0
PD7322a	742	0	0	850	0	0	0	0	422	0	0	0
PD7341a	744	236	897	751	0	0	460	0	0	0	0	0
PD7344a	196	0	0	467	0	0	58	0	0	0	0	0
PD7426a	0	0	12618	0	0	0	5878	0	0	0	0	0
PD7428a	0	0	10369	0	0	4192	1387	0	0	0	0	0
PD8609a	0	2297	0	1725	0	0	1063	0	0	0	0	0
PD8610a	0	202	1617	1313	0	1450	513	0	0	0	0	0
PD8611a	0	0	3521	2375	0	0	931	0	0	0	0	0
PD8612a	729	283	0	402	0	552	0	0	0	0	0	0
PD8614a	331	57	0	1050	0	0	0	0	0	0	0	0
PD8615a	609	519	1727	0	0	0	1414	0	0	0	0	0
PD8617a	423	39	0	1435	0	0	0	0	0	0	0	0
PD8618a	451	65	0	989	0	0	0	0	0	0	0	0
PD8619a	877	0	0	1815	0	528	349	0	0	0	0	0
PD8620a	0	637	0	1111	0	0	908	0	0	0	0	0
PD8621a	599	0	4380	2530	0	0	552	0	0	0	0	0
PD8622a	395	61	0	1276	0	0	76	0	0	0	0	0
PD8623a	412	239	0	1368	0	0	0	0	0	0	0	0
PD8652a2	1055	0	8446	4718	0	0	1635	0	0	0	0	0
PD8660a2	2488	1896	10404	8354	0	0	2985	0	0	0	0	0
PD8828a	571	363	0	795	0	0	330	0	0	0	0	0
PD8830a	1464	0	5503	0	0	1278	0	0	0	0	0	0
PD8832a	0	0	14503	4495	0	6168	1241	0	0	0	0	0
PD8964a	717	0	7567	2142	0	0	723	0	0	0	0	0
PD8965a	0	517	0	2340	0	1133	459	0	0	0	0	0
PD8969a	523	319	2167	2783	0	0	1026	0	0	0	0	0
PD8973a	0	1420	0	2143	0	0	2343	0	0	0	0	0
PD8977a	1949	125	0	1970	0	0	0	0	0	0	0	0
PD8978a	941	0	3491	1775	0	0	461	0	0	0	0	0
PD8979a	793	219	0	2187	0	622	213	0	0	0	0	0
PD8980a	0	633	4475	3315	0	5553	1480	0	0	0	0	0
PD8981a	480	89	0	670	0	366	141	0	0	0	0	0
PD8982a	0	874	13890	0	0	0	6791	0	0	0	0	0
PD8984a	1030	0	6985	0	0	0	1136	0	0	0	0	0
PD8995a	1989	2242	0	0	0	1695	1659	0	0	0	0	0
PD8996a	1058	198	0	1282	0	690	0	0	0	0	0	0
PD8997a	906	115	0	1610	0	0	198	0	0	0	0	0
PD8998a	0	960	0	2041	0	0	1767	0	0	0	0	0
PD8999a	412	59	0	874	0	0	0	0	0	0	0	0
PD9000a	0	284	3367	2430	0	2573	853	0	0	0	0	0
PD9001a	647	48	0	2009	0	0	0	0	0	0	0	0
PD9002a	484	238	0	4784	0	2667	299	0	0	0	0	0
PD9004a	0	377	5681	3379	0	0	1186	0	0	0	0	0
PD9009a	0	2737	0	0	0	4156	8316	0	0	0	0	0
PD9063a	0	30780	0	0	0	0	19264	0	0	0	0	0
PD9064a	1059	0	6745	0	0	3736	808	0	0	0	0	0
PD9065a	550	290	0	815	0	0	0	0	553	0	0	0
PD9067a	468	169	0	804	0	0	111	0	0	0	0	0
PD9193a	422	0	409	451	0	0	160	0	237	0	0	0
PD9464a	633	302	0	1778	0	1425	457	0	0	0	0	653
PD9467a	1052	227	0	1182	0	0	0	0	0	0	0	0
PD9539a	2087	0	0	0	0	1236	255	0	0	0	0	0
PD9541a	1293	280	0	1131	0	0	0	0	0	0	0	0
PD9544a	445	96	0	846	0	0	0	0	0	0	0	0
PD9567a	925	268	0	1191	0	881	244	0	0	0	0	0
PD9568a	0	0	13554	6789	0	5551	4499	0	0	0	0	0
PD9569a	649	0	0	1387	0	0	103	0	0	0	0	0
PD9570a	461	293	0	650	0	0	0	0	0	0	0	0
PD9571a	673	0	1839	1964	0	0	222	0	0	0	0	0
PD9572a	642	0	0	2218	0	0	1221	0	0	0	0	0
PD9573a	760	0	0	855	0	0	0	0	0	0	0	0
PD9574a	573	0	0	672	0	388	0	0	0	0	0	0
PD9575a	641	0	1467	3755	0	0	635	0	0	0	0	0
PD9576a	0	0	9830	3472	0	3859	675	0	0	0	0	0
PD9577a	438	0	0	600	0	424	0	0	0	0	0	160
PD9578a	284	35	0	767	0	0	0	0	0	0	0	0
PD9579a	390	60	0	1104	0	0	77	0	0	0	0	0
PD9581a	454	0	0	1161	0	0	0	0	0	0	0	0
PD9582a	1047	138	1372	0	0	0	181	0	0	0	0	0
PD9584a	777	166	0	1808	0	0	0	0	0	0	0	0
PD9585a	1266	0	4544	0	0	3201	1271	0	0	0	0	0
PD9589a	377	160	0	875	0	0	0	0	0	0	0	0
PD9591a	411	79	0	805	0	0	0	0	0	0	0	0
PD9592a	639	0	7355	0	0	0	501	0	0	0	0	0
PD9593a	407	0	0	1019	0	0	50	0	139	0	0	0
PD9595a	0	0	4684	1322	1006	2317	391	0	0	0	0	0
PD9597a	428	1666	0	0	0	0	815	0	0	0	0	0
PD9599a	1135	167	0	1687	0	0	304	0	0	0	0	0
PD9600a	598	0	0	991	0	428	0	0	0	0	0	0
PD9604a	1469	0	0	0	0	0	0	0	0	0	9199	0
PD9605a	903	0	0	1002	0	1012	138	0	0	0	0	315
PD9606a	478	0	0	743	0	0	0	0	0	0	0	0
PD9694a	845	0	733	0	0	0	0	0	0	0	0	132
PD9696a	387	0	3303	0	0	1439	734	0	0	0	0	0
PD9702a	523	0	6233	0	0	0	1103	0	0	0	0	0
PD9752a	1127	263	0	1713	0	0	371	0	0	0	0	0
PD9754a	672	0	0	710	0	513	0	0	0	0	0	0
PD9755a	491	70	0	851	0	0	0	0	0	0	0	296
PD9756a	0	1339	0	1875	0	0	996	0	0	0	0	0
PD9759a	685	123	0	1383	0	0	0	0	0	0	0	0
PD9760a	1130	529	0	2702	0	0	643	0	0	0	0	0
PD9761a	714	77	0	856	0	454	0	0	0	0	0	0
PD9842a	682	0	0	2340	0	0	177	0	0	0	0	0
PD9843a	383	0	0	1131	0	495	0	0	0	0	0	0
PD9844a	103	0	0	278	0	0	0	0	62	0	0	62
PD9845a	417	210	0	2380	0	0	139	0	0	0	0	0
PD9847a	426	0	0	1802	0	0	0	0	0	0	0	0
PD11353a	953	82	0	1095	0	712	0	0	0	0	0	0
PD11354a	1085	0	0	1028	0	593	0	0	0	0	0	0
PD11378a	580	0	0	954	0	533	0	0	0	0	0	251
PD12664a	704	0	0	1029	0	496	158	0	0	0	0	265
PD13352a	393	66	0	1266	0	0	0	0	0	0	0	0
PD13353a	758	159	0	1466	0	0	169	0	0	0	0	0
PD13357a	747	673	0	1276	0	0	1106	0	0	0	0	0
PD13358a	495	123	0	825	0	0	0	0	0	0	0	0
PD13359a	336	89	0	349	0	298	0	0	0	0	0	0
PD13632a	0	0	6125	0	0	0	12514	0	0	0	0	0
PD13633a	1349	538	0	2224	0	0	566	0	0	0	0	0
PD13769a	0	7939	0	0	0	0	4779	0	0	0	0	0
PD14434a	0	0	1825	1126	348	1419	439	0	0	0	0	0
PD14436a	570	226	0	1535	0	0	0	0	235	0	0	0
PD14443a	1032	296	0	1171	0	1070	247	0	0	0	0	0
PD14444a	348	79	371	949	0	0	0	0	0	0	0	0
PD14445a	386	0	0	755	0	0	83	0	0	0	0	0
PD14446a	655	298	2652	0	0	2780	806	0	0	0	0	734
PD14447a	540	0	0	1088	0	0	83	0	0	0	0	0
PD14449a	849	119	0	1876	0	0	109	0	0	0	0	0
PD14452a	632	149	2813	0	0	1111	366	0	0	0	0	0
PD14455a	0	22424	0	0	0	0	17471	0	0	0	0	0
PD14466a	701	303	0	1549	0	978	286	0	0	0	0	0
PD14469a	1603	487	3005	3400	0	0	955	0	0	0	0	0
PD14470a	523	0	0	596	0	249	0	0	0	0	0	0
PD14474a	766	0	0	1486	0	800	154	0	0	0	0	0
PD17976a	861	0	0	975	0	0	0	0	0	0	0	0
PD17982a	516	53	0	835	0	0	0	0	0	0	0	0
PD17986a	0	0	1666	1262	0	1158	168	0	0	0	0	0
PD17996a	865	164	0	1331	0	0	128	0	0	0	0	0
PD18006a	333	0	0	906	0	288	0	0	0	0	0	0
PD18007a	825	0	5391	1782	0	0	0	0	0	0	0	0
PD18008a	721	0	4008	0	0	3823	643	0	1482	0	0	0
PD18010a	901	0	921	1513	0	0	0	304	0	0	0	0
PD18111a	413	0	0	972	0	0	0	0	0	0	0	188
PD18170a	875	533	0	1803	0	0	438	0	0	0	0	0
PD18175a	1021	0	0	5211	0	0	274	0	0	0	0	0
PD18178a	487	0	0	1099	0	496	0	0	0	0	0	319
PD18184a	2049	532	0	2682	0	1179	0	0	0	0	0	0
PD18233a	379	479	1824	0	0	1177	372	0	0	0	0	0
PD18237a	0	933	5642	0	0	7695	1648	0	0	0	0	0
PD18758a	433	0	0	925	0	0	42	0	0	0	0	0
PD18760a	705	0	0	608	0	0	0	0	222	0	0	0
PD18761a	305	102	0	901	0	0	0	0	0	0	0	0
PD18762a	340	58	0	905	0	0	0	0	0	0	0	0
PD18763a	418	80	0	898	0	0	0	0	0	0	0	0
PD18764a	346	0	0	636	0	0	0	0	0	0	0	0
PD18765a	672	0	0	1653	0	0	0	0	0	0	0	0
PD18772a	442	93	0	618	0	0	0	0	0	0	0	0
PD18777a	557	0	0	1718	0	0	82	0	0	0	0	0
PD20341a	441	0	0	820	0	0	0	0	0	0	0	0
PD20342a	403	0	0	1022	0	480	0	0	0	0	0	186
PD20343a	510	0	0	778	0	568	0	0	658	0	0	0
PD20344a	671	0	4595	0	0	1979	669	0	0	0	0	0
PD20345a	168	0	0	797	0	0	0	0	0	0	0	0
PD20347a	383	119	0	1370	0	349	0	0	0	0	0	0
PD20348a	579	0	0	1090	0	554	88	0	0	0	0	0
PD20400a	431	0	0	1081	0	0	44	0	0	0	0	0
PD20401a	803	0	0	1067	0	692	209	0	0	0	0	0
PD20403a	659	114	0	1069	0	0	0	0	0	0	0	0
PD20404a	748	109	0	990	0	1007	0	0	0	0	0	355
PD20405a	477	103	0	810	0	0	0	0	0	0	0	0
PD4075a	521	0	0	347	0	283	0	0	0	0	0	0
PD6700a2	1474	0	0	1513	0	0	0	0	0	0	0	0
PD6701a2	1079	0	0	1486	0	1260	0	0	0	0	0	546
PD7239a	260	330	0	2236	0	0	0	0	0	0	0	0
PD7308a	1842	0	2104	1658	0	0	431	0	0	0	0	0
PD7310a	607	177	0	1408	0	0	87	0	0	0	0	0
PD7311a	666	0	0	731	0	0	0	0	323	0	0	0
PD7314a	798	0	0	1491	0	0	0	0	0	0	0	0
PD7317a	536	225	0	1507	0	0	0	0	0	0	0	0
PD7318a	0	0	0	0	10370	0	0	0	0	3314	7010	0
PD7319a	541	0	0	1331	0	0	0	0	0	0	0	0
PD7454a	1443	0	0	2076	0	0	0	0	0	0	0	0
PD7455a	569	103	0	1084	0	0	263	0	0	0	0	0
PD8823a	480	172	0	778	0	579	0	0	0	0	0	0
PD8826a	308	47	0	913	0	0	0	0	114	0	0	0
PD9066a	568	1270	0	1256	0	0	508	0	0	0	0	0
PD9590a	207	81	0	484	0	244	109	0	0	0	0	0
PD9596a	295	91	0	1136	0	0	0	0	0	0	0	0

## Sheet: (c)12Sigs_alpha0.02
(c) Exposure in 640 breast cancer WGS using twelve consensus signatures alpha 0.02
Sample	Signature.1	Signature.2	Signature.3	Signature.5	Signature.6	Signature.8	Signature.13	Signature.17	Signature.18	Signature.20	Signature.26	Signature.30
PD10010a	489	0	0	1358	0	387	195	0	0	0	0	0
PD10011a	699	0	3865	3056	0	0	0	651	0	0	0	0
PD10014a	0	0	4460	3462	0	4202	0	0	0	0	0	0
PD11326a	0	0	6010	0	0	2822	795	0	0	0	0	0
PD11327a	0	0	7073	0	0	4892	748	0	0	0	0	0
PD11336a	1372	663	0	1740	0	1371	0	436	0	0	0	0
PD11337a	712	230	0	0	0	1806	323	0	0	0	0	0
PD11338a	729	0	0	1570	0	0	0	0	0	0	0	0
PD11339a	1138	0	0	1390	0	0	0	0	0	0	0	0
PD11340a	884	294	0	0	0	2830	346	0	0	0	0	709
PD11341a	492	299	0	399	0	460	0	0	0	0	0	0
PD11342a	675	813	0	1515	0	0	300	0	0	0	0	0
PD11343a	731	261	0	1170	0	780	0	0	0	0	0	0
PD11344a	0	4524	0	0	0	0	6503	0	0	0	0	0
PD11345a	0	4160	0	3739	0	0	2451	0	0	0	0	0
PD11346a	500	396	0	1156	0	0	238	0	0	0	0	0
PD11347a	493	488	0	1048	0	0	0	0	0	0	0	0
PD11348a	1611	289	0	1338	0	1770	0	0	0	0	0	0
PD11349a	974	915	0	4613	0	0	946	0	0	0	0	0
PD11352a	801	409	0	1374	0	0	0	0	0	0	0	0
PD11355a	476	0	0	1065	0	0	0	0	295	0	0	0
PD11357a	1283	0	0	2095	0	0	0	0	0	0	0	0
PD11358a	837	1473	0	2015	0	0	0	0	0	0	0	0
PD11359a	759	160	0	1746	0	0	0	0	0	0	0	0
PD11360a	1053	145	0	1917	0	0	0	0	0	0	0	0
PD11361a	714	120	0	887	0	0	0	0	0	0	0	0
PD11364a	764	0	0	1431	0	0	143	0	0	0	0	0
PD11365a	0	0	0	4654	0	0	0	0	0	0	8997	0
PD11366a	806	135	0	2063	0	0	0	0	0	0	0	0
PD11367a	1128	0	2829	1740	0	2465	0	0	0	0	0	0
PD11368a	1365	1711	0	3217	0	0	533	0	0	0	0	0
PD11369a	1701	708	0	3156	0	0	567	0	0	0	0	0
PD11370a	355	0	0	923	0	0	0	0	0	0	0	0
PD11372a	0	4426	0	0	0	0	9366	0	0	0	0	0
PD11374a	648	0	0	1663	0	0	71	0	0	0	0	0
PD11375a	784	0	0	1149	0	0	0	0	0	0	0	0
PD11376a	1051	125	0	1975	0	0	0	0	0	0	0	0
PD11379a	0	6809	0	0	0	0	12572	0	0	0	0	0
PD11380a	708	245	0	1766	0	0	0	0	0	0	0	0
PD11381a	399	94	0	1603	0	0	0	0	0	0	0	0
PD11383a	568	0	0	1414	0	595	0	0	0	0	0	0
PD11384a	583	237	0	903	0	0	0	0	0	0	0	0
PD11385a	513	0	0	1171	0	0	0	0	0	0	0	201
PD11386a	751	724	0	1906	0	0	0	0	0	0	0	0
PD11388a	1369	0	0	0	0	2707	296	0	0	0	0	614
PD11389a	398	0	0	1278	0	0	0	0	0	0	0	0
PD11391a	229	0	0	1044	0	0	0	0	0	0	0	0
PD11393a	1598	0	0	1843	0	0	0	0	1226	0	0	0
PD11394a	1338	0	0	870	0	0	0	0	0	0	0	0
PD11395a	926	107	0	1823	0	934	0	0	0	0	0	0
PD11396a	662	0	0	839	0	682	0	0	0	0	0	250
PD11397a	1250	205	0	2463	0	0	383	0	522	0	0	0
PD11398a	651	0	1085	609	0	0	0	0	0	0	0	0
PD11399a	1157	344	0	1993	0	0	0	0	0	0	0	0
PD11402a	798	160	0	1677	0	0	0	0	0	0	0	0
PD11462a	1025	0	0	1673	0	0	139	0	0	0	0	0
PD11464a	0	1051	1862	0	0	0	1583	0	0	0	0	0
PD11465a	0	5037	0	10284	0	0	7229	0	0	0	0	0
PD11740a	676	0	0	1657	0	0	0	0	0	0	0	0
PD11741a	473	110	0	0	0	1273	119	0	0	0	0	0
PD11742a	0	376	0	3858	0	1806	962	0	0	0	0	0
PD11743a	691	91	1497	1028	0	0	0	0	0	0	0	0
PD11744a	539	0	0	1342	0	0	0	0	0	0	0	0
PD11745a	513	226	0	0	0	2072	205	0	0	0	0	0
PD11748a	1172	0	7810	0	0	2777	0	0	0	0	0	0
PD11750a	0	0	7415	0	0	0	2662	0	0	0	0	0
PD11751a	1589	0	12959	0	0	0	2099	0	0	0	0	0
PD11752a	2499	0	0	3091	0	2045	0	0	0	0	0	0
PD11753a	1040	226	2624	2965	0	0	0	0	0	0	0	0
PD11755a	284	0	2307	0	0	0	183	0	0	0	0	0
PD11756a	647	236	0	887	0	0	0	0	0	0	0	0
PD11757a	0	0	1488	0	0	0	463	0	0	0	0	0
PD11760a	1521	0	0	1544	0	0	0	0	1025	0	0	0
PD11761a	401	276	0	2029	0	0	0	0	0	0	0	0
PD11762a	446	210	0	1077	0	0	0	0	0	0	0	0
PD11765a	426	133	0	1441	0	0	0	0	0	0	0	0
PD11766a	315	117	0	1130	0	0	131	0	0	0	0	0
PD11767a	211	0	0	657	0	0	0	0	0	0	0	0
PD11769a	698	126	0	896	0	0	0	0	0	0	0	0
PD11816a	481	491	0	2319	0	0	719	0	0	0	0	0
PD11818a	412	0	0	1113	0	0	78	0	0	0	0	0
PD11819a	454	0	0	1231	0	0	0	0	0	0	0	0
PD13162a	0	485	0	2747	0	0	2170	0	0	0	0	0
PD13163a	883	719	0	3024	0	0	724	0	0	0	0	0
PD13164a	611	226	0	1155	0	727	0	0	0	0	0	0
PD13165a	906	1261	0	2613	0	0	635	0	924	0	0	0
PD13166a	573	173	0	1288	0	0	294	0	0	0	0	0
PD13167a	834	144	0	1228	0	0	197	0	0	0	0	0
PD13168a	867	519	0	1140	0	0	0	0	0	0	0	0
PD13296a	1697	0	14883	0	0	0	2000	0	0	0	0	0
PD13297a	0	0	7229	0	0	0	0	0	0	0	0	7752
PD13298a	1280	0	0	3328	0	2925	832	0	0	0	0	0
PD13299a	0	986	5844	0	0	0	3903	0	0	0	0	0
PD13302a	1532	348	0	3014	0	0	0	0	0	0	0	0
PD13304a	638	0	0	878	0	0	0	0	0	0	0	0
PD13306a	528	319	0	1178	0	0	0	0	0	0	0	0
PD13307a	0	1883	0	2461	0	0	1007	0	0	0	0	0
PD13310a	721	0	0	1109	0	0	0	0	0	0	0	0
PD13311a	0	0	2552	1803	0	0	153	0	0	0	0	0
PD13312a	448	0	0	1585	0	0	0	0	0	0	0	0
PD13416a	622	0	0	1316	0	0	0	0	0	0	0	0
PD13418a	1367	1141	2299	0	0	0	1999	0	0	0	0	0
PD13419a	314	72	0	705	0	0	0	0	0	0	0	0
PD13420a	603	0	0	1258	0	0	0	0	0	0	0	0
PD13422a	537	73	0	1029	0	0	0	0	164	0	0	0
PD13424a	1279	0	0	1118	0	1257	298	0	0	0	0	0
PD13425a	0	5599	0	0	0	0	28902	0	0	0	0	0
PD13426a	776	129	0	1793	0	0	0	0	0	0	0	0
PD13427a	350	0	0	783	0	0	0	0	0	0	0	0
PD13428a	780	0	0	2493	0	0	148	0	0	0	0	0
PD13602a	1153	0	2207	2205	0	0	347	0	0	0	0	0
PD13603a	717	234	0	1735	0	0	376	0	0	0	0	0
PD13604a	0	47894	0	0	0	0	45207	0	0	0	0	0
PD13605a	373	0	0	815	0	0	48	0	0	0	0	0
PD13606a	1435	432	0	1837	0	2186	0	0	0	0	0	0
PD13607a	853	232	0	1896	0	0	305	0	0	0	0	0
PD13608a	832	654	0	1443	0	0	1175	0	0	0	0	0
PD13609a	0	1192	0	1474	0	0	2038	0	0	0	0	0
PD13618a	482	229	0	1120	0	0	0	0	0	0	0	0
PD13619a	622	0	0	1489	0	0	0	0	0	0	0	0
PD13620a	1419	0	0	1671	0	1238	268	0	0	0	0	0
PD13622a	1275	0	0	2374	0	0	0	0	704	0	0	0
PD13623a	0	1473	0	2021	0	0	305	0	0	0	0	0
PD13625a	2307	882	0	0	0	4959	0	3088	0	0	0	0
PD13626a	334	0	0	741	0	0	0	0	0	0	0	0
PD13627a	565	0	7295	0	0	0	581	0	0	0	0	0
PD13629a	553	416	0	1058	0	0	0	0	0	0	0	0
PD13630a	681	557	0	2078	0	0	789	0	0	0	0	0
PD13631a	526	280	0	1616	0	0	0	0	180	0	0	0
PD13752a	520	0	0	1233	0	735	0	0	0	0	0	319
PD13753a	0	2364	0	0	0	0	5630	0	0	0	0	0
PD13754a	670	0	0	1835	0	0	0	0	0	0	0	0
PD13755a	579	0	0	1356	0	0	0	0	0	0	0	0
PD13756a	516	0	0	1566	0	0	0	0	0	0	0	0
PD13757a	358	344	0	632	0	0	150	0	0	0	0	0
PD13758a	352	0	0	1946	0	0	0	0	0	0	0	0
PD13760a	657	0	1990	0	0	1367	619	0	0	0	0	0
PD13761a	327	0	0	1100	0	0	0	0	0	0	0	260
PD13762a	497	0	0	1155	0	0	0	0	0	0	0	0
PD13763a	834	140	0	1588	0	0	0	0	0	0	0	0
PD13764a	672	0	0	2495	0	1033	628	0	0	0	0	0
PD13765a	1174	0	0	0	0	1512	0	0	1993	0	0	797
PD13766a	0	1589	0	1471	0	0	775	0	0	0	0	0
PD13767a	584	258	0	1300	0	494	0	0	0	0	0	0
PD13768a	530	0	0	821	0	0	0	0	0	0	0	0
PD13770a	591	146	0	1101	0	0	0	0	238	0	0	0
PD13771a	0	0	5093	0	0	4724	1632	0	0	0	0	1638
PD14432a	399	0	0	1205	0	0	0	0	0	0	0	265
PD14433a	849	1306	0	1426	0	0	0	0	0	0	0	0
PD14435a	1187	219	0	2037	0	0	271	0	0	0	0	0
PD14437a	1036	0	0	1926	0	936	462	0	0	0	0	0
PD14439a	426	50	0	839	0	0	0	0	0	0	0	0
PD14441a	391	0	0	2497	0	1500	272	0	0	0	0	0
PD14442a	478	0	0	1267	0	0	0	0	0	0	0	0
PD14450a	288	0	0	954	0	0	54	0	0	0	0	0
PD14453a	0	2067	5519	0	0	0	2329	0	0	0	0	0
PD14454a	574	0	0	1032	0	611	291	0	0	0	0	0
PD14456a	742	0	0	1234	0	0	0	0	0	0	0	0
PD14457a	1182	311	0	2258	0	0	0	0	813	0	0	0
PD14458a	534	0	0	978	0	0	0	0	0	0	0	0
PD14459a	649	102	0	941	0	0	0	0	392	0	0	0
PD14460a	956	2689	0	0	0	0	878	0	0	0	0	0
PD14461a	524	0	0	911	0	0	0	0	0	0	0	0
PD14462a	753	347	0	1254	0	0	272	0	0	0	0	0
PD14465a	974	187	0	1336	0	597	0	0	0	0	0	0
PD14467a	620	153	0	849	0	0	0	0	0	0	0	0
PD14468a	571	0	0	977	0	0	0	0	0	0	0	0
PD14471a	1323	0	0	1123	0	822	0	0	0	0	0	0
PD14472a	573	294	0	1429	0	0	0	0	0	0	0	0
PD14473a	581	0	0	564	0	397	0	0	0	0	0	0
PD17973a	552	0	0	941	0	0	0	0	530	0	0	0
PD17981a	2461	1280	0	1939	0	0	0	0	1282	0	0	0
PD17991a	515	0	0	706	0	0	0	0	0	0	0	0
PD17994a	443	216	0	646	0	0	0	0	0	0	0	0
PD18017a	398	153	0	1555	0	0	0	0	0	0	0	0
PD18020a	0	0	13473	0	0	0	4298	0	0	0	0	0
PD18022a	522	104	0	845	0	0	129	0	0	0	0	0
PD18024a	0	0	7618	0	0	2964	521	0	0	0	0	0
PD18031a	773	97	0	1666	0	0	231	0	0	0	0	0
PD18037a	2985	391	0	2594	0	0	0	0	0	0	0	0
PD18045a	0	3730	0	6728	0	0	9008	0	0	0	0	0
PD18046a	915	111	0	1873	0	0	0	0	0	0	0	0
PD18047a	817	162	0	1363	0	0	0	0	0	0	0	0
PD18048a	1178	0	0	3259	0	0	348	0	0	0	0	0
PD18049a	879	452	0	1830	0	0	229	0	0	0	0	0
PD18050a	1393	316	0	1564	0	0	291	0	0	0	0	0
PD18100a	409	147	0	524	0	449	0	0	0	0	0	0
PD18101a	320	0	0	542	0	0	0	0	0	0	0	0
PD18116a	465	134	0	943	0	0	0	0	0	0	0	0
PD18149a	551	112	0	1906	0	0	0	0	0	0	0	0
PD18188a	609	138	0	1487	0	0	0	0	0	0	0	0
PD18189a	681	482	0	2382	0	0	278	0	446	0	0	0
PD18247a	0	3582	0	0	0	0	5553	0	0	0	0	0
PD18251a	621	157	1314	1394	0	0	0	0	0	0	0	0
PD18257a	609	260	0	1372	0	0	434	0	296	0	0	0
PD18258a	405	0	0	736	0	0	0	0	0	0	0	0
PD18259a	871	389	2311	0	0	2542	523	0	0	0	0	0
PD18264a	0	5047	0	0	0	0	1632	0	0	0	0	0
PD18269a	381	0	0	1005	0	0	0	0	0	0	0	0
PD18728a	392	200	0	1176	0	0	0	0	0	0	0	0
PD18730a	0	498	0	837	0	0	564	0	0	0	0	0
PD18733a	519	254	0	2244	0	0	0	0	0	0	0	0
PD18734a	1123	202	0	973	0	1528	0	0	0	0	0	0
PD18748a	940	786	0	1231	0	0	0	0	0	0	0	0
PD18749a	0	922	0	0	0	0	3738	0	0	0	0	0
PD18751a	701	0	0	0	0	950	0	0	0	0	0	255
PD18754a	677	709	0	930	0	0	275	0	0	0	0	0
PD18756a	658	74	0	902	0	0	0	0	0	0	0	0
PD18768a	598	90	0	1866	0	0	0	0	0	0	0	0
PD18769a	0	498	0	1245	0	0	1237	0	0	0	0	0
PD18771a	541	0	0	1234	0	0	0	0	0	0	0	0
PD18775a	419	50	0	860	0	0	0	0	0	0	0	0
PD18776a	519	0	0	1109	0	0	0	0	0	0	0	0
PD22036a	269	0	0	777	0	0	0	0	0	0	0	0
PD22251a	552	0	0	952	0	0	0	0	0	0	0	0
PD22355a	1072	0	4858	0	0	3830	0	0	0	0	0	0
PD22357a	0	2136	0	3235	0	0	2347	0	0	0	0	0
PD22358a	0	0	5279	0	0	0	878	0	0	0	0	0
PD22359a	431	196	0	1188	0	0	0	0	0	0	0	0
PD22360a	0	0	5266	0	0	2510	732	0	0	0	0	0
PD22361a	0	1366	0	2408	0	0	2124	0	0	0	0	0
PD22362a	260	390	0	0	0	1052	0	0	0	0	0	245
PD22363a	0	0	4193	1820	0	2890	0	0	0	0	0	0
PD22364a	808	484	0	792	0	0	316	0	0	0	0	0
PD22365a	251	0	0	804	0	849	0	0	0	0	0	0
PD22366a	0	0	4829	3425	0	0	1554	0	0	0	0	0
PD23550a	743	560	0	1561	0	0	0	0	0	0	0	0
PD23554a	0	0	4041	0	0	2396	461	0	0	0	0	0
PD23558a	1075	0	6163	0	0	2300	594	0	0	0	0	0
PD23559a	606	0	0	3039	0	1088	646	0	0	0	0	0
PD23560a	468	244	0	1902	0	0	390	0	0	0	0	0
PD23561a	0	16982	0	0	0	0	41045	0	0	0	0	0
PD23562a	661	0	6061	0	0	0	624	0	0	0	0	0
PD23563a	0	0	4479	0	0	3743	0	0	0	0	0	0
PD23564a	23012	0	0	0	38836	0	0	0	0	0	21597	0
PD23565a	0	2672	0	0	0	3754	2425	0	0	0	0	0
PD23566a	559	0	4256	0	0	1851	0	0	0	0	0	0
PD23567a	632	0	3965	0	0	2599	0	0	0	0	0	0
PD23569a	91	0	499	415	0	0	48	0	0	0	0	0
PD23570a	376	602	0	962	0	0	303	0	0	0	0	0
PD23574a	0	0	10754	0	0	0	2339	0	0	0	0	0
PD23577a	350	0	2399	1219	0	0	0	0	0	0	0	0
PD23578a	0	0	4523	0	0	2316	0	0	0	0	0	0
PD23579a	0	0	0	36233	20876	0	0	0	0	30201	0	0
PD24182a	0	0	4279	3198	0	0	2059	0	0	0	0	0
PD24186a	0	0	3436	3778	0	0	272	0	0	0	0	0
PD24189a	0	0	0	11879	9239	0	0	0	0	0	8470	0
PD24190a	0	0	0	3792	0	3093	786	2135	0	0	0	0
PD24191a	0	0	3484	2635	0	0	0	0	0	0	0	0
PD24192a	0	0	16195	0	0	0	1631	0	0	0	0	0
PD24193a	0	0	0	0	3697	2330	0	0	0	0	3726	1481
PD24194a	0	5323	0	0	0	0	8371	0	0	0	0	0
PD24195a	417	61	0	1761	0	0	0	0	0	0	0	0
PD24196a	0	129	0	1015	0	1222	253	0	0	0	0	0
PD24197a	0	0	10114	0	0	10100	0	0	0	0	0	0
PD24199a	503	130	0	1999	0	0	221	0	0	0	0	0
PD24200a	0	0	639	0	0	334	0	0	0	0	0	0
PD24201a	0	0	0	9496	0	9270	1710	0	0	0	0	0
PD24202a	615	0	6229	0	0	0	934	0	0	0	0	0
PD24204a	1478	0	0	1316	0	0	0	0	0	0	0	0
PD24205a	0	0	3316	0	0	4206	414	0	0	0	0	989
PD24206a	0	324	0	1949	0	1115	221	0	0	0	0	0
PD24207a	1116	1174	0	1425	0	0	1028	0	0	0	0	0
PD24208a	0	15706	0	0	0	0	9917	0	0	0	0	0
PD24209a	0	1920	0	0	0	0	8248	0	0	0	0	0
PD24212a	0	0	4406	0	0	4102	533	0	0	0	0	1013
PD24214a	1311	0	0	1314	0	0	0	0	452	0	0	0
PD24215a	0	0	0	3060	0	2534	581	0	0	0	0	0
PD24216a	0	2810	0	3852	0	0	2676	0	0	0	0	0
PD24217a	0	3984	0	0	0	0	11320	0	0	0	0	0
PD24218a	434	236	0	2616	0	0	0	0	0	0	0	0
PD24219a	1717	0	0	1601	0	0	0	0	0	0	0	0
PD24220a	1179	0	0	1646	0	0	784	0	0	0	0	0
PD24221a	0	0	692	1338	0	0	77	0	183	0	0	0
PD24223a	825	880	0	1721	0	0	0	0	0	0	0	0
PD24224a	549	125	0	1432	0	0	104	0	0	0	0	0
PD24225a	290	374	0	946	0	0	209	0	0	0	0	0
PD24302a	393	86	0	787	0	0	0	0	0	0	0	0
PD24303a	0	0	3909	0	0	0	590	0	0	0	0	0
PD24304a	0	0	3500	0	0	3352	0	0	0	0	0	0
PD24306a	0	0	2003	0	0	1152	179	0	0	0	0	0
PD24307a	337	98	0	1157	0	0	0	0	0	0	0	0
PD24308a	662	0	0	3712	0	0	377	0	0	0	0	0
PD24314a	809	0	0	2542	0	0	148	0	370	0	0	0
PD24318a	639	0	0	1906	0	0	0	0	0	0	0	0
PD24320a	0	0	0	0	0	0	0	0	0	0	15695	0
PD24322a	925	639	0	2433	0	0	870	0	0	0	0	0
PD24325a	0	0	3462	5463	0	0	1460	0	0	0	0	0
PD24326a	0	12731	0	0	0	0	10888	0	0	0	0	0
PD24327a	0	6059	0	0	0	0	10125	0	0	0	0	0
PD24329a	920	181	0	1009	0	0	0	0	0	0	0	0
PD24332a	750	144	0	0	0	1024	0	0	0	0	0	0
PD24333a	0	0	0	0	0	0	0	22884	0	0	0	0
PD24335a	1456	183	0	2013	0	0	295	0	0	0	0	0
PD24336a	0	326	0	2770	0	0	241	0	0	0	0	0
PD24337a	463	0	4949	0	0	0	293	0	0	0	0	0
PD3851a	414	125	0	642	0	636	0	0	0	0	0	0
PD3890a	0	0	3028	1779	0	0	775	0	0	0	0	0
PD3904a	0	0	2637	0	0	1596	500	0	0	0	0	933
PD3905a	292	189	3619	0	0	0	501	0	0	0	0	0
PD3945a	0	0	0	6458	0	3387	705	0	0	0	0	0
PD3989a	731	265	0	1241	0	0	0	0	0	0	0	0
PD4005a	0	679	3775	0	0	0	1586	0	0	0	0	0
PD4006a	698	0	8876	0	0	0	0	0	0	0	0	0
PD4069a	800	0	0	989	0	0	0	0	294	0	0	0
PD4072a	0	13802	0	0	0	0	14128	0	0	0	0	0
PD4076a	699	260	0	1130	0	0	0	0	0	0	0	0
PD4085a	606	158	0	1002	0	935	0	0	0	0	0	0
PD4086a	0	211	0	1299	0	0	440	0	0	0	0	0
PD4088a	661	99	689	0	0	0	0	0	240	0	0	0
PD4103a	1222	623	0	2763	0	0	609	0	0	0	0	0
PD4107a	0	789	6179	0	0	2904	0	0	0	0	0	0
PD4109a	1811	515	0	6156	0	0	1828	0	0	0	0	0
PD4115a	0	0	3606	3142	0	2627	376	0	0	0	0	0
PD4116a	0	0	4700	0	0	2588	880	0	0	0	0	0
PD4192a	830	0	2858	0	0	0	603	0	0	0	0	0
PD4194a	419	112	0	696	0	0	198	0	0	0	0	0
PD4198a	1121	612	0	2522	0	0	260	0	0	0	0	0
PD4199a	0	2600	0	1859	0	0	2487	0	0	0	0	0
PD4225a	985	144	0	825	0	0	0	0	0	0	0	0
PD4248a	317	93	0	1644	0	0	140	0	0	0	0	0
PD4252a	1000	0	0	2167	0	0	131	0	473	0	0	0
PD4255a	727	0	0	2865	0	0	0	0	960	0	0	0
PD4261a	474	0	0	1321	0	0	0	0	0	0	0	0
PD4264a	910	239	0	967	0	0	0	0	0	0	0	0
PD4266a	0	815	0	1192	0	0	379	0	0	0	0	0
PD4267a	687	0	0	965	0	0	466	0	0	0	0	0
PD4315a	666	511	0	1787	0	0	422	0	0	0	0	0
PD4604a	0	0	2990	2837	0	2914	580	0	0	0	0	0
PD4605a	1032	0	0	1389	0	0	227	0	0	0	0	0
PD4606a	385	0	0	743	0	0	0	0	0	0	0	0
PD4607a	0	16125	0	0	0	0	9827	0	0	0	0	0
PD4613a	0	631	0	1062	0	0	500	0	0	0	0	0
PD4826a	752	522	0	1935	0	0	607	0	0	0	0	0
PD4833a	401	0	5510	0	0	0	489	0	0	0	0	0
PD4836a	663	0	1373	1962	0	0	302	0	0	0	0	0
PD4841a	646	0	4228	1860	0	0	284	0	0	0	0	0
PD4844a	0	0	8004	3826	0	0	978	0	0	0	0	0
PD4845a	592	0	2768	0	0	1592	0	781	0	0	0	0
PD4847a	1029	0	0	5879	0	4132	0	0	0	0	0	0
PD4872a	0	441	0	1974	0	1667	726	0	0	0	0	0
PD4874a	0	708	0	4219	0	2533	2247	0	0	0	0	0
PD4875a	677	0	3611	2215	0	0	300	0	0	0	0	0
PD4876a	0	213	2972	1276	0	0	446	0	0	0	0	0
PD4951a	270	0	912	1332	0	0	263	0	0	0	0	0
PD4952a	1000	491	6698	0	0	2937	904	0	0	0	0	0
PD4953a	0	0	3013	0	0	2808	393	0	0	0	0	729
PD4954a	623	0	3529	1194	0	0	415	0	0	0	0	0
PD4955a	0	0	0	1384	0	3705	447	0	0	0	0	532
PD4956a	0	0	10171	0	0	0	1410	0	0	0	0	0
PD4957a	0	196	0	1638	0	1170	272	0	0	0	0	0
PD4958a	0	506	0	5251	0	2849	730	0	0	0	0	0
PD4959a	541	0	2537	0	0	1531	0	0	0	0	0	0
PD4962a	0	1519	0	0	0	2724	2599	0	0	0	0	0
PD4965a	720	110	0	1874	0	0	0	0	0	0	0	0
PD4967a	0	565	0	1806	0	0	855	0	0	0	0	0
PD4968a	1294	1022	0	2462	0	0	0	0	0	0	0	0
PD4969a	248	53	0	730	0	0	0	0	0	0	0	0
PD4970a	649	206	0	1553	0	0	0	0	0	0	0	0
PD4971a	976	0	0	860	0	740	186	0	0	0	0	0
PD4972a	391	0	0	753	0	0	0	0	0	0	0	0
PD4975a	974	0	6531	0	0	0	0	0	0	0	0	0
PD4976a	1915	0	0	3789	0	0	570	0	0	0	0	0
PD4977a	0	25022	0	0	0	0	17235	0	0	0	0	0
PD4978a	594	533	0	1934	0	0	672	0	0	0	0	0
PD4980a	685	0	0	1306	0	1631	172	0	0	0	0	0
PD4981a	621	0	0	0	0	831	0	0	0	0	0	209
PD4982a	589	0	0	884	0	0	0	0	0	0	0	0
PD4983a	388	0	0	1374	0	0	0	0	0	0	0	0
PD4985a	473	117	0	1413	0	0	0	0	0	0	0	0
PD4986a	417	0	0	1558	0	0	0	0	0	0	0	0
PD5925a	0	0	4761	2798	0	0	1220	0	0	0	0	0
PD5928a	540	460	3812	0	0	2300	0	0	0	0	0	0
PD5930a	351	0	3136	0	0	0	457	0	0	0	0	0
PD5932a	0	0	8332	0	0	0	1727	0	0	0	0	0
PD5934a	0	0	8197	0	0	3381	0	0	0	0	0	0
PD5935a	866	0	7676	0	0	0	1127	0	0	0	0	0
PD5936a	748	246	0	1786	0	0	0	0	0	0	0	0
PD5937a	0	26190	0	0	0	0	17991	0	0	31914	0	0
PD5942a	1396	0	2467	1798	0	0	328	0	0	0	0	0
PD5944a	801	76	0	1731	0	0	0	0	0	0	0	0
PD5945a	0	0	5653	0	0	2726	452	0	0	0	0	0
PD5946a	1299	0	0	2026	0	0	291	0	293	0	0	0
PD5947a	492	176	0	889	0	0	221	0	0	0	0	0
PD5948a	0	0	12981	0	0	0	0	0	0	0	2190	0
PD5950a	917	0	0	1048	0	0	0	0	223	0	0	0
PD5951a	1415	272	0	1504	0	0	0	0	0	0	0	0
PD5953a	731	0	0	1404	0	0	0	0	0	0	0	0
PD5956a	665	117	0	0	0	2934	0	0	0	0	0	368
PD5959a	572	308	0	1622	0	0	0	0	0	0	0	0
PD5960a	0	0	0	2117	449	1212	266	0	0	0	0	0
PD5961a	698	273	0	1342	0	0	0	0	0	0	0	0
PD5964a	385	117	0	510	0	576	0	0	0	0	0	0
PD6016a2	500	399	0	799	0	0	211	0	0	0	0	0
PD6041a	541	0	0	1229	0	0	0	0	0	0	0	0
PD6042a	0	527	0	3559	0	1912	1119	0	0	0	0	0
PD6043a	0	6607	0	0	0	8679	7476	0	0	0	0	0
PD6044a	658	0	0	1766	0	0	147	0	0	0	0	0
PD6045a	374	528	0	1238	0	0	191	0	0	0	0	0
PD6046a	839	180	0	1595	0	0	0	0	360	0	0	0
PD6047a	2032	660	0	5754	0	0	0	0	994	0	0	0
PD6048a	986	0	0	0	0	1305	211	0	0	0	0	599
PD6404a	749	277	2997	2002	0	0	525	0	0	0	0	0
PD6405a	0	6063	0	0	0	0	29253	0	0	0	0	0
PD6406a	304	0	4721	0	0	0	0	0	0	0	0	0
PD6409a	0	0	4382	0	0	3325	1101	0	0	0	0	0
PD6410a	430	0	6019	0	0	0	863	0	0	0	0	0
PD6411a	0	0	6087	0	0	0	587	0	0	0	0	0
PD6412a	0	0	0	0	8980	8789	0	0	0	0	7416	0
PD6413a	0	261	2219	0	0	1466	640	0	0	0	0	0
PD6414a	381	151	0	1228	0	0	0	0	0	0	0	0
PD6415a	0	547	3779	3629	0	0	1588	0	0	0	0	0
PD6416a	0	0	1614	0	0	1027	410	278	0	0	0	0
PD6417a	737	0	0	808	0	0	0	0	0	0	0	0
PD6418a	512	0	0	1507	0	0	0	0	0	0	0	0
PD6422a	875	555	0	2327	0	1422	0	0	0	0	0	0
PD6466b	516	153	0	1138	0	0	0	0	0	0	0	0
PD6684a	0	0	10869	0	0	0	2807	0	0	0	0	0
PD6711a2	676	105	0	1131	0	0	0	0	0	0	0	0
PD6719a	802	0	4168	0	0	0	0	0	0	0	0	0
PD6720a	630	180	0	1207	0	0	0	0	0	0	0	0
PD6721a	801	227	0	1202	0	0	0	0	0	0	0	0
PD6722a	0	1928	0	0	0	0	8181	0	0	0	0	0
PD6727b	1682	0	0	3632	0	0	1363	0	0	0	0	0
PD6728b	470	0	1214	0	0	726	166	0	0	0	0	0
PD6729a2	1028	0	2326	1516	0	0	0	0	0	0	0	0
PD6730b	631	0	7402	0	0	2055	0	0	0	0	0	0
PD6731a2	0	1112	4780	0	0	0	2656	0	0	0	0	0
PD6732b	554	0	0	1896	0	0	463	0	0	0	0	0
PD6733b	1100	489	0	2417	0	0	668	0	0	0	0	0
PD7066a	661	0	2708	0	0	0	267	0	0	0	0	0
PD7067a	817	0	2522	2132	0	0	507	0	0	0	0	0
PD7069a	0	1015	0	2731	0	0	1384	0	0	0	0	0
PD7199a	480	0	0	649	0	0	0	0	0	0	0	0
PD7201a	548	155	0	879	0	0	0	0	0	0	0	0
PD7202a	1650	676	0	1870	0	0	0	0	943	0	0	0
PD7203a	0	211	0	811	0	0	320	0	220	0	0	0
PD7204a	700	182	0	1293	0	0	0	0	0	0	0	0
PD7205a	0	972	0	4731	0	0	2153	0	0	0	0	0
PD7206a	852	0	0	2346	0	1252	288	0	0	0	0	0
PD7207a	923	302	0	1627	0	0	0	0	0	0	0	0
PD7209a	647	79	0	938	0	0	0	0	0	0	0	0
PD7210a	468	0	0	850	0	0	0	0	0	0	0	0
PD7211a	746	0	5014	0	0	2104	419	0	0	0	0	0
PD7214a	345	80	0	1067	0	0	0	0	0	0	0	0
PD7215a	0	855	0	0	0	3425	1197	0	0	0	0	905
PD7217a	0	631	3605	3630	0	0	1301	0	0	0	0	0
PD7218a	587	0	0	662	0	0	0	0	223	0	0	0
PD7219a	0	4042	0	0	0	0	7578	0	0	0	0	0
PD7220a	978	431	0	1079	0	0	220	0	0	0	0	0
PD7221a	790	362	0	679	0	0	207	0	0	0	0	0
PD7238a	732	336	0	1148	0	0	0	0	0	0	0	0
PD7240a	1358	0	0	3576	0	0	252	0	0	0	0	0
PD7243a	966	474	0	2195	0	2787	350	0	0	0	0	0
PD7248a	0	0	6540	4946	0	0	1555	0	0	0	0	0
PD7249a	0	850	0	2837	0	0	895	0	0	0	0	0
PD7250a	905	0	6984	0	0	0	0	0	0	0	0	0
PD7304a	477	246	0	674	0	604	0	0	0	0	0	0
PD7305a	1471	326	0	1919	0	0	496	0	541	0	0	0
PD7306a	1402	679	0	4185	0	0	595	0	0	0	0	0
PD7307a	0	2242	0	2629	0	0	3551	0	0	0	0	0
PD7316a	518	0	4827	0	0	0	301	0	0	0	0	0
PD7321a	554	0	4537	0	0	0	963	0	0	0	0	0
PD7322a	703	0	0	955	0	0	0	0	355	0	0	0
PD7341a	744	236	1648	0	0	0	460	0	0	0	0	0
PD7344a	196	0	0	467	0	0	58	0	0	0	0	0
PD7426a	0	0	12618	0	0	0	5878	0	0	0	0	0
PD7428a	0	0	10225	0	0	4417	1306	0	0	0	0	0
PD8609a	0	2143	0	1970	0	0	973	0	0	0	0	0
PD8610a	0	195	0	2966	0	1426	509	0	0	0	0	0
PD8611a	0	0	3521	2375	0	0	931	0	0	0	0	0
PD8612a	722	279	0	0	0	965	0	0	0	0	0	0
PD8614a	331	57	0	1050	0	0	0	0	0	0	0	0
PD8615a	0	523	2331	0	0	0	1414	0	0	0	0	0
PD8617a	454	0	0	1444	0	0	0	0	0	0	0	0
PD8618a	451	0	0	1054	0	0	0	0	0	0	0	0
PD8619a	881	0	0	2347	0	0	341	0	0	0	0	0
PD8620a	0	639	0	1110	0	0	906	0	0	0	0	0
PD8621a	617	0	6877	0	0	0	566	0	0	0	0	0
PD8622a	402	137	0	1269	0	0	0	0	0	0	0	0
PD8623a	393	267	0	1358	0	0	0	0	0	0	0	0
PD8652a2	0	0	8439	5778	0	0	1637	0	0	0	0	0
PD8660a2	0	1896	10404	10842	0	0	2985	0	0	0	0	0
PD8828a	563	379	0	787	0	0	330	0	0	0	0	0
PD8830a	1425	0	6820	0	0	0	0	0	0	0	0	0
PD8832a	0	0	20240	0	0	6168	0	0	0	0	0	0
PD8964a	0	0	7422	2948	0	0	780	0	0	0	0	0
PD8965a	0	517	0	2340	0	1133	459	0	0	0	0	0
PD8969a	0	319	2019	3450	0	0	1031	0	0	0	0	0
PD8973a	0	1425	0	2148	0	0	2333	0	0	0	0	0
PD8977a	2112	0	0	1933	0	0	0	0	0	0	0	0
PD8978a	941	0	5267	0	0	0	461	0	0	0	0	0
PD8979a	793	219	0	2810	0	0	213	0	0	0	0	0
PD8980a	0	658	0	7895	0	5443	1461	0	0	0	0	0
PD8981a	486	94	0	1025	0	0	141	0	0	0	0	0
PD8982a	0	0	14765	0	0	0	6791	0	0	0	0	0
PD8984a	1030	0	6985	0	0	0	1136	0	0	0	0	0
PD8995a	3684	2242	0	0	0	0	1659	0	0	0	0	0
PD8996a	1258	124	0	1050	0	796	0	0	0	0	0	0
PD8997a	906	0	0	1610	0	0	313	0	0	0	0	0
PD8998a	0	960	0	2041	0	0	1767	0	0	0	0	0
PD8999a	472	0	0	874	0	0	0	0	0	0	0	0
PD9000a	0	284	5798	0	0	2573	853	0	0	0	0	0
PD9001a	654	0	0	2050	0	0	0	0	0	0	0	0
PD9002a	0	538	0	5269	0	2667	0	0	0	0	0	0
PD9004a	0	0	5681	3757	0	0	1186	0	0	0	0	0
PD9009a	0	2747	0	0	0	0	12462	0	0	0	0	0
PD9063a	0	30784	0	0	0	0	19260	0	0	0	0	0
PD9064a	1059	0	6745	0	0	3736	808	0	0	0	0	0
PD9065a	550	290	0	815	0	0	0	0	553	0	0	0
PD9067a	444	162	0	822	0	0	124	0	0	0	0	0
PD9193a	422	0	0	860	0	0	160	0	237	0	0	0
PD9464a	647	305	0	2460	0	1381	456	0	0	0	0	0
PD9467a	1055	218	0	1188	0	0	0	0	0	0	0	0
PD9539a	2343	0	0	0	0	1236	0	0	0	0	0	0
PD9541a	1293	280	0	1131	0	0	0	0	0	0	0	0
PD9544a	431	104	0	852	0	0	0	0	0	0	0	0
PD9567a	925	268	0	2073	0	0	244	0	0	0	0	0
PD9568a	0	0	13554	12341	0	0	4499	0	0	0	0	0
PD9569a	649	0	0	1491	0	0	0	0	0	0	0	0
PD9570a	464	292	0	648	0	0	0	0	0	0	0	0
PD9571a	674	0	2113	1912	0	0	0	0	0	0	0	0
PD9572a	642	0	0	2218	0	0	1221	0	0	0	0	0
PD9573a	760	0	0	855	0	0	0	0	0	0	0	0
PD9574a	573	0	0	1060	0	0	0	0	0	0	0	0
PD9575a	0	0	0	5864	0	0	635	0	0	0	0	0
PD9576a	0	0	10505	3472	0	3859	0	0	0	0	0	0
PD9577a	438	0	0	743	0	442	0	0	0	0	0	0
PD9578a	308	0	0	779	0	0	0	0	0	0	0	0
PD9579a	390	0	0	1104	0	0	138	0	0	0	0	0
PD9581a	441	0	0	1174	0	0	0	0	0	0	0	0
PD9582a	1047	138	1554	0	0	0	0	0	0	0	0	0
PD9584a	777	166	0	1808	0	0	0	0	0	0	0	0
PD9585a	1262	0	4594	0	0	3135	1291	0	0	0	0	0
PD9589a	386	167	0	858	0	0	0	0	0	0	0	0
PD9591a	413	77	0	804	0	0	0	0	0	0	0	0
PD9592a	639	0	7856	0	0	0	0	0	0	0	0	0
PD9593a	407	0	0	1159	0	0	50	0	0	0	0	0
PD9595a	0	0	4684	0	1006	3639	391	0	0	0	0	0
PD9597a	0	1673	0	0	0	0	1237	0	0	0	0	0
PD9599a	1135	167	0	1687	0	0	304	0	0	0	0	0
PD9600a	599	0	0	991	0	428	0	0	0	0	0	0
PD9604a	1470	0	0	0	0	0	0	0	0	0	9198	0
PD9605a	922	0	0	880	0	1188	0	0	0	0	0	381
PD9606a	478	0	0	743	0	0	0	0	0	0	0	0
PD9694a	978	0	733	0	0	0	0	0	0	0	0	0
PD9696a	0	0	3303	0	0	1826	734	0	0	0	0	0
PD9702a	0	0	6715	0	0	0	1145	0	0	0	0	0
PD9752a	1110	242	0	1709	0	0	412	0	0	0	0	0
PD9754a	672	0	0	1224	0	0	0	0	0	0	0	0
PD9755a	484	66	0	1159	0	0	0	0	0	0	0	0
PD9756a	0	1337	0	1878	0	0	995	0	0	0	0	0
PD9759a	680	117	0	1393	0	0	0	0	0	0	0	0
PD9760a	1141	626	0	2619	0	0	618	0	0	0	0	0
PD9761a	694	83	0	1325	0	0	0	0	0	0	0	0
PD9842a	682	0	0	2340	0	0	178	0	0	0	0	0
PD9843a	383	0	0	1626	0	0	0	0	0	0	0	0
PD9844a	103	0	0	340	0	0	0	0	62	0	0	0
PD9845a	414	359	0	2373	0	0	0	0	0	0	0	0
PD9847a	429	0	0	1799	0	0	0	0	0	0	0	0
PD11353a	953	0	0	1178	0	712	0	0	0	0	0	0
PD11354a	1085	0	0	1622	0	0	0	0	0	0	0	0
PD11378a	565	0	0	1754	0	0	0	0	0	0	0	0
PD12664a	704	0	0	1294	0	496	158	0	0	0	0	0
PD13352a	393	66	0	1266	0	0	0	0	0	0	0	0
PD13353a	758	159	0	1466	0	0	169	0	0	0	0	0
PD13357a	0	673	0	2023	0	0	1106	0	0	0	0	0
PD13358a	495	123	0	825	0	0	0	0	0	0	0	0
PD13359a	336	89	0	648	0	0	0	0	0	0	0	0
PD13632a	0	0	0	0	0	0	18640	0	0	0	0	0
PD13633a	1349	538	0	2224	0	0	566	0	0	0	0	0
PD13769a	0	7939	0	0	0	0	4779	0	0	0	0	0
PD14434a	0	0	0	3299	0	1419	439	0	0	0	0	0
PD14436a	574	227	0	1765	0	0	0	0	0	0	0	0
PD14443a	1004	292	0	1256	0	1013	250	0	0	0	0	0
PD14444a	397	78	0	1273	0	0	0	0	0	0	0	0
PD14445a	390	0	0	750	0	0	84	0	0	0	0	0
PD14446a	655	0	2652	0	0	2780	806	0	0	0	0	1033
PD14447a	541	0	0	1170	0	0	0	0	0	0	0	0
PD14449a	849	228	0	1876	0	0	0	0	0	0	0	0
PD14452a	838	0	2779	0	0	1125	330	0	0	0	0	0
PD14455a	0	22424	0	0	0	0	17471	0	0	0	0	0
PD14466a	701	303	0	2527	0	0	286	0	0	0	0	0
PD14469a	1603	508	0	6392	0	0	947	0	0	0	0	0
PD14470a	527	0	0	842	0	0	0	0	0	0	0	0
PD14474a	741	0	0	2300	0	0	166	0	0	0	0	0
PD17976a	854	0	0	982	0	0	0	0	0	0	0	0
PD17982a	516	0	0	889	0	0	0	0	0	0	0	0
PD17986a	0	0	1666	1262	0	1158	168	0	0	0	0	0
PD17996a	867	165	0	1329	0	0	128	0	0	0	0	0
PD18006a	312	0	0	1215	0	0	0	0	0	0	0	0
PD18007a	825	0	5391	1782	0	0	0	0	0	0	0	0
PD18008a	721	0	4008	0	0	3823	643	0	1482	0	0	0
PD18010a	901	0	0	2434	0	0	0	304	0	0	0	0
PD18111a	413	0	0	1160	0	0	0	0	0	0	0	0
PD18170a	874	533	0	1808	0	0	434	0	0	0	0	0
PD18175a	1070	0	0	5034	0	0	403	0	0	0	0	0
PD18178a	487	0	0	1099	0	496	0	0	0	0	0	319
PD18184a	2049	532	0	3861	0	0	0	0	0	0	0	0
PD18233a	388	475	1826	0	0	1168	374	0	0	0	0	0
PD18237a	0	933	5642	0	0	7695	1648	0	0	0	0	0
PD18758a	410	0	0	990	0	0	0	0	0	0	0	0
PD18760a	705	0	0	608	0	0	0	0	222	0	0	0
PD18761a	307	104	0	897	0	0	0	0	0	0	0	0
PD18762a	340	0	0	964	0	0	0	0	0	0	0	0
PD18763a	418	80	0	898	0	0	0	0	0	0	0	0
PD18764a	346	0	0	636	0	0	0	0	0	0	0	0
PD18765a	672	0	0	1653	0	0	0	0	0	0	0	0
PD18772a	439	92	0	621	0	0	0	0	0	0	0	0
PD18777a	559	0	0	1798	0	0	0	0	0	0	0	0
PD20341a	441	0	0	820	0	0	0	0	0	0	0	0
PD20342a	409	0	0	1192	0	491	0	0	0	0	0	0
PD20343a	513	0	0	1348	0	0	0	0	653	0	0	0
PD20344a	679	0	4624	0	0	1947	665	0	0	0	0	0
PD20345a	166	0	0	799	0	0	0	0	0	0	0	0
PD20347a	368	119	0	1734	0	0	0	0	0	0	0	0
PD20348a	579	0	0	1644	0	0	88	0	0	0	0	0
PD20400a	431	0	0	1126	0	0	0	0	0	0	0	0
PD20401a	803	0	0	1067	0	692	209	0	0	0	0	0
PD20403a	659	114	0	1069	0	0	0	0	0	0	0	0
PD20404a	747	0	0	1001	0	997	0	0	0	0	0	465
PD20405a	477	103	0	810	0	0	0	0	0	0	0	0
PD4075a	521	0	0	631	0	0	0	0	0	0	0	0
PD6700a2	1475	0	0	1512	0	0	0	0	0	0	0	0
PD6701a2	1141	0	0	2373	0	858	0	0	0	0	0	0
PD7239a	260	330	0	2236	0	0	0	0	0	0	0	0
PD7308a	1842	0	0	3763	0	0	431	0	0	0	0	0
PD7310a	607	264	0	1408	0	0	0	0	0	0	0	0
PD7311a	662	0	0	736	0	0	0	0	322	0	0	0
PD7314a	798	0	0	1491	0	0	0	0	0	0	0	0
PD7317a	536	227	0	1505	0	0	0	0	0	0	0	0
PD7318a	0	0	0	0	10370	0	0	0	0	0	10324	0
PD7319a	541	0	0	1331	0	0	0	0	0	0	0	0
PD7454a	1475	0	0	2044	0	0	0	0	0	0	0	0
PD7455a	554	0	0	1194	0	0	271	0	0	0	0	0
PD8823a	480	172	0	778	0	579	0	0	0	0	0	0
PD8826a	311	0	0	910	0	0	0	0	162	0	0	0
PD9066a	0	1268	0	1819	0	0	516	0	0	0	0	0
PD9590a	215	82	0	720	0	0	108	0	0	0	0	0
PD9596a	308	86	0	1128	0	0	0	0	0	0	0	0

## Sheet: (d)30Sigs_alpha0
(d) Exposure in 640 breast cancer WGS using thirty consensus signatures alpha 0
Sample	Signature.1	Signature.2	Signature.3	Signature.4	Signature.5	Signature.6	Signature.7	Signature.8	Signature.9	Signature.10	Signature.11	Signature.12	Signature.13	Signature.14	Signature.15	Signature.16	Signature.17	Signature.18	Signature.19	Signature.20	Signature.21	Signature.22	Signature.23	Signature.24	Signature.25	Signature.26	Signature.27	Signature.28	Signature.29	Signature.30	MMR_deficient_samples
PD11365a	672	0	0	0	0	0	0	0	2699	0	0	5823	0	0	0	0	0	0	0	0	0	0	0	0	0	4455	0	0	0	0	MMR_deficient
PD23561a	0	16786	0	0	0	2003	0	3066	0	0	0	3459	28969	0	3743	0	0	0	0	0	0	0	0	0	0	0	0	0	0	0	MMR_deficient
PD23564a	30319	0	0	0	0	33268	0	0	0	0	0	19859	0	0	0	0	0	0	0	0	0	0	0	0	0	0	0	0	0	0	MMR_deficient
PD23579a	0	0	0	0	19771	13854	0	0	0	0	0	18435	0	10257	0	0	0	0	0	24991	0	0	0	0	0	0	0	0	0	0	MMR_deficient
PD24189a	4794	0	0	0	0	7549	0	0	0	0	0	11224	0	0	0	0	0	0	0	6021	0	0	0	0	0	0	0	0	0	0	MMR_deficient
PD24193a	1475	438	0	0	0	2569	0	0	0	0	0	2805	440	0	0	0	0	0	0	1634	1872	0	0	0	0	0	0	0	0	0	MMR_deficient
PD24320a	1542	0	0	0	0	0	0	0	1673	0	0	2605	0	0	0	0	0	0	0	0	3856	0	0	0	0	6016	0	0	0	0	MMR_deficient
PD5937a	0	26690	0	0	0	8942	0	0	0	0	0	0	18248	6313	0	4605	0	0	0	8133	3163	0	0	0	0	0	0	0	0	0	MMR_deficient
PD6412a	2282	0	0	0	0	3030	0	4547	0	0	0	8440	565	0	1611	0	0	0	0	3922	0	0	0	0	0	0	0	786	0	0	MMR_deficient
PD9604a	1457	0	0	0	0	0	0	0	993	0	0	1692	186	0	0	0	0	0	0	0	0	0	0	0	0	6338	0	0	0	0	MMR_deficient
PD7318a	2577	0	0	0	0	7178	0	0	0	0	0	4577	0	0	0	0	0	0	0	3407	2954	0	0	0	0	0	0	0	0	0	MMR_deficient
PD10010a	505	38	466	0	525	0	0	308	201	0	40	0	183	0	0	0	0	0	0	0	0	0	0	0	0	0	0	0	0	160
PD10011a	844	0	3378	0	0	0	0	0	1278	0	0	0	244	0	0	817	0	0	0	0	0	0	0	0	612	354	190	551	0	0
PD10014a	0	83	4525	0	0	839	157	4044	638	0	0	459	381	0	0	994	0	0	0	0	0	0	0	0	0	0	0	0	0	0
PD11326a	573	211	3776	0	0	0	0	2921	0	0	136	0	823	0	0	840	0	0	0	0	0	0	0	0	344	0	0	0	0	0
PD11327a	0	139	5942	0	0	508	0	4630	836	0	0	0	656	0	0	0	0	0	0	0	0	0	0	0	0	0	0	0	0	0
PD11336a	1309	656	845	0	0	0	206	905	318	0	0	0	0	0	0	0	287	392	368	0	0	0	0	0	0	0	0	297	0	0
PD11337a	669	201	0	0	409	0	80	892	390	0	0	0	295	0	0	0	0	133	0	0	0	0	0	0	0	0	0	0	0	0
PD11338a	747	47	0	0	1009	0	0	420	0	0	74	0	0	0	0	0	0	0	0	0	0	0	0	0	0	0	0	0	0	0
PD11339a	1163	0	0	0	510	0	0	304	0	0	0	0	72	0	0	313	0	0	0	0	0	0	0	0	0	0	0	0	0	164
PD11340a	807	308	813	0	0	259	294	853	857	0	238	0	307	0	0	0	0	323	0	0	0	0	0	0	0	0	0	0	0	0
PD11341a	464	219	0	0	378	0	0	459	0	0	0	0	89	0	0	0	0	0	0	0	0	0	0	0	0	0	0	40	0	0
PD11342a	591	822	0	0	1068	106	42	359	0	0	0	0	314	0	0	0	0	0	0	0	0	0	0	0	0	0	0	0	0	0
PD11343a	788	129	486	144	633	0	0	538	0	0	0	0	104	0	0	0	0	0	0	0	0	0	0	0	0	0	0	0	0	118
PD11344a	300	4391	447	0	0	0	253	0	0	77	0	0	5557	0	0	0	0	0	0	0	0	0	0	0	0	0	0	0	0	0
PD11345a	664	4088	0	0	889	0	0	1309	0	235	275	0	2410	0	0	0	0	479	0	0	0	0	0	0	0	0	0	0	0	0
PD11346a	416	371	0	0	387	189	59	391	167	0	78	0	229	0	0	0	0	0	0	0	0	0	0	0	0	0	0	0	0	0
PD11347a	484	352	0	0	729	0	0	205	0	0	130	0	128	0	0	0	0	0	0	0	0	0	0	0	0	0	0	0	0	0
PD11348a	1591	148	0	0	1403	0	0	1316	0	0	0	0	180	0	0	0	0	369	0	0	0	0	0	0	0	0	0	0	0	0
PD11349a	1036	907	1071	0	1532	0	217	1440	0	0	0	0	896	0	145	0	0	0	0	0	0	0	0	0	0	0	0	0	0	203
PD11352a	795	402	0	0	646	0	0	272	0	0	0	137	0	0	0	0	0	0	152	0	0	0	0	0	0	0	0	0	0	180
PD11355a	416	28	0	0	500	0	0	432	0	69	0	0	44	0	0	0	0	244	0	0	0	0	0	0	0	0	0	0	0	102
PD11357a	1156	99	0	0	829	0	0	591	0	0	0	0	0	0	231	469	0	0	0	0	0	0	0	0	0	0	0	0	0	0
PD11358a	840	1442	209	0	0	0	77	550	0	0	0	0	0	0	195	671	0	0	134	0	0	0	0	0	0	0	0	0	0	205
PD11359a	778	148	203	0	552	0	0	465	0	0	0	0	66	0	98	352	0	0	0	0	0	0	0	0	0	0	0	0	0	0
PD11360a	950	124	0	0	1266	0	0	642	0	0	0	0	0	0	132	0	0	0	0	0	0	0	0	0	0	0	0	0	0	0
PD11361a	712	77	0	0	0	0	49	350	75	0	0	0	39	0	57	304	0	56	0	0	0	0	0	0	0	0	0	0	0	0
PD11364a	732	45	0	0	223	0	67	489	125	0	0	0	121	0	97	436	0	0	0	0	0	0	0	0	0	0	0	0	0	0
PD11366a	730	156	0	0	916	0	0	437	0	38	0	0	0	0	0	268	0	0	0	0	0	0	0	188	0	0	0	0	0	269
PD11367a	1001	156	2886	0	767	0	0	1782	0	0	0	0	194	0	339	492	0	0	233	0	0	0	0	0	309	0	0	0	0	0
PD11368a	1263	1579	0	0	916	0	275	1565	501	0	0	0	502	0	223	0	0	0	0	0	0	0	0	0	0	0	0	0	0	0
PD11369a	1732	711	0	270	1242	0	244	805	500	95	0	0	531	0	0	0	0	0	0	0	0	0	0	0	0	0	0	0	0	0
PD11370a	365	0	308	0	229	0	0	0	0	0	62	0	0	0	0	312	0	0	0	0	0	0	0	0	0	0	0	0	0	0
PD11372a	621	4467	0	0	1321	0	0	0	0	0	0	0	7382	0	0	0	0	0	0	0	0	0	0	0	0	0	0	0	0	0
PD11374a	689	0	0	0	852	0	0	485	0	0	0	0	95	0	0	0	0	0	0	0	0	0	0	0	0	0	0	0	0	260
PD11375a	735	82	0	0	415	0	0	509	0	0	0	0	0	0	190	0	0	0	0	0	0	0	0	0	0	0	0	0	0	0
PD11376a	1122	138	0	0	414	0	0	491	0	0	197	0	46	0	80	400	0	260	0	0	0	0	0	0	0	0	0	0	0	0
PD11379a	430	6634	1789	0	0	0	0	1280	0	0	0	0	8864	0	0	0	0	382	0	0	0	0	0	0	0	0	0	0	0	0
PD11380a	737	191	212	0	426	0	0	0	221	0	109	0	53	0	85	308	0	0	0	0	0	0	0	0	0	0	0	0	192	181
PD11381a	438	70	231	0	404	0	66	124	0	0	0	0	0	0	0	365	0	0	140	0	79	0	0	0	0	0	0	0	91	83
PD11383a	608	0	0	0	844	0	0	581	250	0	0	0	96	0	0	0	0	0	0	0	0	0	0	0	0	0	0	0	0	197
PD11384a	573	112	0	0	332	0	98	226	0	0	0	0	121	0	0	259	0	0	0	0	0	0	0	0	0	0	0	0	0	0
PD11385a	502	48	195	0	485	0	92	409	0	0	0	0	31	0	0	0	0	0	0	0	44	0	77	0	0	0	0	0	0	0
PD11386a	789	513	0	0	1155	0	176	456	0	0	0	0	162	0	128	0	0	0	0	0	0	0	0	0	0	0	0	0	0	0
PD11388a	1448	91	715	0	718	0	0	1020	0	0	0	0	270	0	0	0	0	169	0	0	0	0	0	0	0	0	0	0	0	555
PD11389a	411	0	0	0	707	0	0	372	0	0	0	0	0	0	0	0	0	0	0	0	0	0	0	0	0	0	0	0	0	185
PD11391a	264	14	0	0	394	0	0	199	0	0	51	0	0	0	0	291	0	0	0	0	0	0	0	0	0	0	0	0	0	57
PD11393a	1502	85	0	0	0	0	0	1059	709	0	0	0	126	367	0	0	0	817	0	0	0	0	0	0	0	0	0	0	0	0
PD11394a	1335	29	191	0	0	0	71	311	0	0	0	0	27	0	0	241	0	0	0	0	0	0	0	0	0	0	0	0	0	0
PD11395a	909	110	418	0	471	0	99	651	326	0	74	0	31	0	138	0	201	152	0	0	0	0	0	0	0	0	0	79	126	0
PD11396a	668	68	0	0	526	0	0	655	0	0	113	0	62	0	63	276	0	0	0	0	0	0	0	0	0	0	0	0	0	0
PD11397a	1413	217	418	0	0	0	0	911	0	0	204	0	370	0	0	691	0	599	0	0	0	0	0	0	0	0	0	0	0	0
PD11398a	671	43	562	0	247	0	0	464	230	0	72	0	54	0	0	0	0	0	0	0	0	0	0	0	0	0	0	0	0	0
PD11399a	1206	245	0	0	979	0	114	586	0	0	0	0	102	0	0	0	0	261	0	0	0	0	0	0	0	0	0	0	0	0
PD11402a	781	0	0	0	1854	0	0	0	0	0	0	0	0	0	0	0	0	0	0	0	0	0	0	0	0	0	0	0	0	0
PD11462a	1021	84	0	0	880	0	0	724	0	0	0	0	128	0	0	0	0	0	0	0	0	0	0	0	0	0	0	0	0	0
PD11464a	700	1023	1036	0	0	0	0	0	0	0	0	0	1559	0	0	0	0	177	0	0	0	0	0	0	0	0	0	0	0	0
PD11465a	2015	5115	0	0	5127	0	0	2886	0	0	0	0	7406	0	0	0	0	0	0	0	0	0	0	0	0	0	0	0	0	0
PD11740a	698	69	0	0	847	0	0	481	108	0	128	0	0	0	0	0	0	0	0	0	0	0	0	0	0	0	0	0	0	0
PD11741a	420	100	0	0	0	0	0	778	197	0	0	0	129	0	117	0	0	231	0	0	0	0	0	0	0	0	0	0	0	0
PD11742a	490	381	2194	333	451	0	154	1488	316	0	92	0	928	0	129	0	0	0	0	0	0	43	0	0	0	0	0	0	0	0
PD11743a	671	82	826	0	814	0	83	530	117	0	0	0	59	0	0	0	0	0	123	0	0	0	0	0	0	0	0	0	0	0
PD11744a	590	0	0	0	515	0	0	331	0	0	0	0	0	0	0	343	0	0	0	0	0	0	0	0	0	0	0	0	0	102
PD11745a	398	226	521	122	216	91	0	741	205	125	66	0	168	0	0	0	0	133	0	0	0	0	0	0	0	0	0	0	0	0
PD11748a	588	131	6150	0	0	281	110	3145	313	0	0	0	552	0	0	0	0	0	229	0	0	0	0	0	0	257	0	0	0	0
PD11750a	496	0	5573	0	0	0	0	0	680	0	0	570	2757	0	0	0	0	0	0	0	0	0	0	0	0	0	0	0	0	0
PD11751a	826	406	9053	0	0	510	354	1423	982	0	0	0	2064	0	0	1025	0	0	0	0	0	0	0	0	0	0	0	0	0	0
PD11752a	2332	136	1272	0	1994	0	0	990	0	0	0	0	0	0	230	0	0	679	0	0	0	0	0	0	0	0	0	0	0	0
PD11753a	1133	167	1501	0	1307	0	0	774	716	0	0	0	118	0	0	0	228	0	0	0	0	0	0	0	0	0	0	141	0	769
PD11755a	304	34	1362	0	397	0	0	350	186	0	0	0	139	0	0	0	0	0	0	0	0	0	0	0	0	0	0	0	0	0
PD11756a	658	242	0	0	550	0	0	319	0	0	0	0	0	0	0	0	0	0	0	0	0	0	0	0	0	0	0	0	0	0
PD11757a	128	0	884	0	0	0	46	318	0	0	0	0	480	0	0	94	0	0	0	0	0	0	0	0	0	0	0	0	0	0
PD11760a	1414	133	0	0	955	0	0	600	0	245	0	0	0	0	0	0	0	742	0	0	0	0	0	0	0	0	0	0	0	0
PD11761a	408	173	460	0	267	0	128	412	280	0	0	0	68	0	0	319	0	0	0	0	0	0	0	0	0	0	0	0	0	186
PD11762a	436	167	0	0	670	0	0	342	0	0	72	0	44	0	0	0	0	0	0	0	0	0	0	0	0	0	0	0	0	0
PD11765a	409	41	297	0	252	0	43	245	114	0	0	0	61	0	0	287	0	0	0	0	0	0	0	0	0	45	0	0	0	203
PD11766a	340	103	0	0	722	0	0	268	0	0	0	0	151	0	0	0	0	0	0	0	0	0	0	0	0	0	0	0	0	109
PD11767a	191	0	0	0	367	0	0	212	0	0	0	0	0	0	0	0	0	0	0	0	0	0	0	0	0	0	0	0	0	97
PD11769a	662	78	145	0	299	0	57	246	109	0	0	0	43	0	0	0	0	0	80	0	0	0	0	0	0	0	0	0	0	0
PD11816a	499	482	0	0	613	0	110	732	0	0	0	0	688	0	129	547	0	0	208	0	0	0	0	0	0	0	0	0	0	0
PD11818a	419	0	0	0	583	0	79	325	0	0	0	0	68	0	0	0	0	0	126	0	0	0	0	0	0	0	0	0	0	0
PD11819a	492	0	370	0	325	0	0	198	78	0	0	0	0	0	0	172	0	0	0	0	0	0	0	0	0	0	0	0	0	47
PD13162a	754	464	1154	0	0	0	0	0	173	0	0	0	2137	0	0	529	0	0	0	0	0	0	0	0	0	0	0	0	0	190
PD13163a	925	718	1037	0	591	0	0	463	308	84	0	185	707	0	0	329	0	0	0	0	0	0	0	0	0	0	0	0	0	0
PD13164a	588	94	394	0	653	0	66	403	126	0	0	0	124	0	0	0	0	138	0	0	0	0	0	0	0	0	0	0	0	130
PD13165a	867	1233	430	0	0	0	0	1162	0	340	0	0	587	0	0	314	0	850	237	0	0	0	0	0	0	0	0	0	0	317
PD13166a	465	138	0	0	170	119	75	467	0	111	0	0	300	0	0	306	0	90	0	0	0	0	0	0	0	84	0	0	0	0
PD13167a	864	142	529	0	712	0	0	0	0	0	0	0	156	0	0	0	0	0	0	0	0	0	0	0	0	0	0	0	0	0
PD13168a	832	396	0	0	662	0	0	306	0	0	40	0	130	0	0	0	0	159	0	0	0	0	0	0	0	0	0	0	0	0
PD13296a	1034	206	9395	0	0	316	0	3550	1078	0	403	0	2147	0	0	0	330	0	0	0	0	117	0	0	0	0	0	0	0	0
PD13297a	0	0	7110	0	0	0	0	0	0	0	0	0	0	0	0	0	0	0	0	0	0	0	0	0	0	0	0	0	0	7871
PD13298a	1400	117	1794	0	1294	0	0	1534	628	0	0	0	807	0	0	0	0	394	0	0	0	0	0	0	0	0	0	0	0	394
PD13299a	448	945	3288	0	1076	0	133	964	0	0	0	0	3877	0	0	0	0	0	0	0	0	0	0	0	0	0	0	0	0	0
PD13302a	1370	291	0	0	1575	0	121	1142	393	0	0	0	0	0	0	0	0	0	0	0	0	0	0	0	0	0	0	0	0	0
PD13304a	623	35	0	0	239	0	0	393	165	0	59	0	0	0	0	0	0	0	0	0	0	0	0	0	0	0	0	0	0	0
PD13306a	546	302	216	0	163	0	59	405	0	0	64	0	0	0	0	132	0	0	0	0	43	0	0	0	0	0	0	0	0	90
PD13307a	974	1839	0	0	0	0	211	764	0	0	0	0	996	0	0	566	0	0	0	0	0	0	0	0	0	0	0	0	0	0
PD13310a	764	42	0	0	746	0	0	232	0	0	44	0	0	0	0	0	0	0	0	0	0	0	0	0	0	0	0	0	0	0
PD13311a	319	0	2378	200	0	0	48	513	475	0	0	342	165	0	0	0	0	0	0	0	0	66	0	0	0	0	0	0	0	0
PD13312a	494	0	0	0	930	0	0	263	241	0	47	0	57	0	0	0	0	0	0	0	0	0	0	0	0	0	0	0	0	0
PD13416a	603	0	0	0	702	0	122	411	0	0	0	0	43	0	55	0	0	0	0	0	0	0	0	0	0	0	0	0	0	0
PD13418a	1088	1107	1047	0	489	240	0	297	293	107	0	0	2003	0	0	0	0	0	0	0	0	0	0	0	0	0	0	0	0	132
PD13419a	342	72	173	0	0	0	0	112	0	0	0	0	0	0	64	326	0	0	0	0	0	0	0	0	0	0	0	0	0	0
PD13420a	619	0	319	0	0	0	0	218	0	0	0	0	24	0	0	465	0	0	0	0	64	0	0	0	0	0	0	0	0	149
PD13422a	517	81	0	0	534	0	0	363	0	0	40	0	28	0	83	0	0	156	0	0	0	0	0	0	0	0	0	0	0	0
PD13424a	1050	89	456	0	0	303	124	1152	450	0	0	0	229	0	0	0	0	0	0	0	0	0	0	0	0	0	0	0	0	95
PD13425a	1225	5514	3713	629	888	0	0	1641	744	813	0	0	17986	0	0	0	0	728	0	0	0	0	0	0	0	0	0	0	0	615
PD13426a	840	106	0	0	536	0	128	377	245	0	88	0	0	0	0	374	0	0	0	0	0	0	0	0	0	0	0	0	0	0
PD13427a	369	0	0	0	302	0	0	114	0	0	41	0	17	0	0	232	0	55	0	0	0	0	0	0	0	0	0	0	0	0
PD13428a	757	45	0	0	1068	0	0	523	0	0	0	0	122	0	0	517	0	0	0	0	0	0	0	0	0	0	0	0	0	387
PD13602a	1156	0	1421	0	812	0	0	680	682	0	158	0	331	0	0	0	0	408	0	0	0	0	0	0	0	0	0	0	0	261
PD13603a	697	247	0	0	737	0	0	600	199	129	114	0	338	0	0	0	0	0	0	0	0	0	0	0	0	0	0	0	0	0
PD13604a	0	42595	0	0	0	0	0	0	0	0	0	0	45260	0	0	0	0	5245	0	0	0	0	0	0	0	0	0	0	0	0
PD13605a	381	0	249	0	0	0	0	233	0	0	0	0	57	0	0	245	0	0	0	0	0	0	0	0	0	0	0	0	0	71
PD13606a	1433	222	0	0	1484	0	0	1715	0	347	170	0	212	0	0	0	0	306	0	0	0	0	0	0	0	0	0	0	0	0
PD13607a	850	226	0	0	440	0	81	685	227	0	0	0	307	146	0	321	0	0	0	0	0	0	0	0	0	0	0	0	0	0
PD13608a	870	694	255	0	0	74	0	193	0	0	135	0	1120	0	0	762	0	0	0	0	0	0	0	0	0	0	0	0	0	0
PD13609a	450	1174	0	0	907	0	0	189	0	53	0	0	1930	0	0	0	0	0	0	0	0	0	0	0	0	0	0	0	0	0
PD13618a	495	218	0	0	694	0	0	277	0	0	79	0	67	0	0	0	0	0	0	0	0	0	0	0	0	0	0	0	0	0
PD13619a	670	84	309	0	549	0	0	0	0	0	0	0	0	0	0	332	0	0	165	0	0	0	0	0	0	0	0	0	0	0
PD13620a	1478	143	0	0	1022	0	0	822	702	0	0	0	196	0	0	0	0	233	0	0	0	0	0	0	0	0	0	0	0	0
PD13622a	1131	96	514	0	672	149	0	902	190	0	0	0	0	0	0	0	0	698	0	0	0	0	0	0	0	0	0	0	0	0
PD13623a	596	1449	0	0	997	0	106	138	0	0	0	0	369	0	0	0	0	0	0	0	0	0	0	142	0	0	0	0	0	0
PD13625a	1957	491	0	0	0	0	0	5402	0	0	0	0	410	0	0	0	2976	0	0	0	0	0	0	0	0	0	0	0	0	0
PD13626a	342	0	0	0	455	0	35	200	0	0	0	0	42	0	0	0	0	0	0	0	0	0	0	0	0	0	0	0	0	0
PD13627a	656	0	5811	0	0	0	0	0	838	0	0	578	556	0	0	0	0	0	0	0	0	0	0	0	0	0	0	0	0	0
PD13629a	576	340	0	0	456	0	0	261	0	0	0	151	70	0	0	0	0	0	0	0	0	0	0	0	0	0	0	0	0	170
PD13630a	730	597	0	0	627	0	0	1132	0	0	218	0	801	0	0	0	0	0	0	0	0	0	0	0	0	0	0	0	0	0
PD13631a	517	172	0	0	900	0	0	602	0	164	135	0	110	0	0	0	0	0	0	0	0	0	0	0	0	0	0	0	0	0
PD13752a	565	76	0	0	787	0	137	524	243	0	0	0	49	0	0	0	102	150	170	0	0	0	0	0	0	0	0	0	0	0
PD13753a	710	2365	1284	0	0	0	0	0	0	0	0	0	3634	0	0	0	0	0	0	0	0	0	0	0	0	0	0	0	0	0
PD13754a	743	0	379	0	0	0	0	357	362	0	0	0	91	0	0	463	0	0	0	0	108	0	0	0	0	0	0	0	0	0
PD13755a	595	0	0	0	0	0	0	364	0	0	0	0	24	0	0	594	0	0	0	0	101	0	0	0	0	0	0	0	0	256
PD13756a	559	43	0	0	463	0	0	435	0	0	0	0	30	0	0	345	0	0	204	0	0	0	0	0	0	0	0	0	0	0
PD13757a	347	325	189	0	0	0	79	179	173	32	0	0	160	0	0	0	0	0	0	0	0	0	0	0	0	0	0	0	0	0
PD13758a	405	0	242	0	443	0	0	318	138	0	129	0	28	0	0	330	0	0	0	0	97	0	0	0	0	0	0	0	0	165
PD13760a	510	129	1043	209	246	0	66	1058	0	0	0	0	666	0	0	262	0	0	78	0	0	39	0	0	245	0	0	77	0	0
PD13761a	343	46	0	0	375	0	0	296	0	0	145	0	0	0	0	379	0	0	101	0	0	0	0	0	0	0	0	0	0	0
PD13762a	522	0	0	0	0	0	47	453	0	0	66	0	21	0	27	443	0	0	0	0	0	0	0	0	0	0	0	0	0	69
PD13763a	839	130	267	0	329	0	0	606	79	0	62	0	0	0	0	246	0	0	0	0	0	0	0	0	0	0	0	0	0	0
PD13764a	671	233	621	0	1066	0	0	1116	615	0	0	0	393	0	110	0	0	0	0	0	0	0	0	0	0	0	0	0	0	0
PD13765a	1081	113	0	0	0	0	204	780	504	0	0	0	165	0	136	0	0	1786	335	0	0	0	0	0	0	0	0	0	369	0
PD13766a	327	1568	106	0	0	122	120	260	0	0	0	0	771	0	0	424	0	0	0	0	0	0	0	0	0	0	0	0	0	134
PD13767a	618	254	283	0	374	0	0	332	0	48	0	0	53	0	0	222	0	113	0	0	0	0	0	0	0	0	0	0	0	337
PD13768a	550	25	0	0	308	0	0	78	132	0	46	0	23	0	0	185	0	0	0	0	0	0	0	0	0	0	0	0	0	0
PD13770a	606	114	0	0	699	0	0	415	0	0	0	0	0	0	0	0	0	242	0	0	0	0	0	0	0	0	0	0	0	0
PD13771a	389	502	5154	0	0	0	0	3279	981	0	779	0	1514	0	0	0	0	0	488	0	0	0	0	0	0	0	0	0	0	0
PD14432a	437	0	0	0	374	0	0	410	133	0	90	0	52	0	0	177	0	0	0	0	0	0	0	0	0	0	0	0	0	192
PD14433a	854	1196	505	0	0	0	0	0	0	0	0	0	309	0	0	538	0	0	0	0	0	0	0	0	0	0	0	0	0	177
PD14435a	1169	195	0	0	398	0	0	811	301	0	181	0	256	0	0	401	0	0	0	0	0	0	0	0	0	0	0	0	0	0
PD14437a	1020	140	1024	0	0	0	0	815	717	246	111	0	285	0	0	0	0	0	0	0	0	0	0	0	0	0	0	0	0	0
PD14439a	333	58	0	0	439	0	0	161	0	34	0	0	0	0	41	0	0	0	126	0	0	0	0	120	0	0	0	0	0	0
PD14441a	433	76	1304	405	272	120	78	1011	154	0	84	0	230	0	0	305	0	0	0	0	49	0	0	0	0	0	0	54	0	82
PD14442a	439	39	0	0	364	0	0	435	0	0	76	0	0	0	0	390	0	0	0	0	0	0	0	0	0	0	0	0	0	0
PD14450a	242	30	0	0	390	0	0	227	0	0	0	0	39	0	86	207	0	0	0	0	0	0	0	0	0	0	0	0	0	74
PD14453a	1006	1972	1576	0	0	0	298	1175	896	0	0	0	2344	0	0	644	0	0	0	0	0	0	0	0	0	0	0	0	0	0
PD14454a	587	119	409	0	488	0	0	661	0	0	67	0	177	0	0	0	0	0	0	0	0	0	0	0	0	0	0	0	0	0
PD14456a	747	0	0	0	757	0	0	274	0	0	0	0	39	0	0	0	0	158	0	0	0	0	0	0	0	0	0	0	0	0
PD14457a	1188	257	0	0	1263	0	295	696	0	0	0	0	0	0	0	0	0	865	0	0	0	0	0	0	0	0	0	0	0	0
PD14458a	520	31	0	0	303	0	52	340	92	0	0	0	31	0	0	0	0	0	0	0	59	0	0	0	0	0	0	0	0	80
PD14459a	654	83	0	0	530	0	82	262	0	0	0	0	39	0	0	0	0	360	0	0	0	0	0	0	0	0	0	0	0	71
PD14460a	887	1808	408	0	0	0	0	0	0	0	161	0	868	0	0	388	0	0	0	0	0	0	0	0	0	0	0	0	0	0
PD14461a	516	0	174	0	194	0	73	166	119	0	0	0	18	0	0	171	0	0	0	0	0	0	0	0	0	0	0	0	0	0
PD14462a	640	321	0	0	272	48	112	307	0	0	0	0	270	0	0	523	0	0	0	0	0	0	0	0	0	0	0	0	0	130
PD14465a	967	98	445	0	822	0	0	420	0	0	85	0	110	0	0	0	0	144	0	0	0	0	0	0	0	0	0	0	0	0
PD14467a	673	59	0	0	392	0	71	212	120	0	0	0	93	0	0	0	0	0	0	0	0	0	0	0	0	0	0	0	0	0
PD14468a	583	39	0	0	580	0	62	258	0	0	0	0	25	0	0	0	0	0	0	0	0	0	0	0	0	0	0	0	0	0
PD14471a	1337	73	533	0	0	0	0	721	0	0	104	0	87	0	0	412	0	0	0	0	0	0	0	0	0	0	0	0	0	0
PD14472a	638	184	0	0	882	0	0	365	0	0	106	0	121	0	0	0	0	0	0	0	0	0	0	0	0	0	0	0	0	0
PD14473a	610	36	136	0	288	0	0	299	0	0	0	0	38	0	0	0	0	0	0	0	0	0	0	0	0	0	0	0	0	133
PD17973a	544	64	0	0	543	0	0	334	0	58	0	0	0	0	0	0	0	479	0	0	0	0	0	0	0	0	0	0	0	0
PD17981a	2403	1207	0	0	646	0	112	901	288	0	0	0	322	0	0	0	0	959	0	0	122	0	0	0	0	0	0	0	0	0
PD17991a	440	43	0	0	522	0	42	173	0	0	0	0	0	0	0	0	0	0	0	0	0	0	0	0	0	0	0	0	0	0
PD17994a	465	198	0	0	0	0	0	245	0	0	41	0	86	0	0	268	0	0	0	0	0	0	0	0	0	0	0	0	0	0
PD18017a	470	96	0	0	477	0	0	429	0	0	0	0	47	0	27	422	0	0	0	0	0	0	0	0	0	0	0	0	0	136
PD18020a	715	481	7343	0	0	0	172	3987	480	0	0	497	3906	0	0	0	0	0	187	0	0	0	0	0	0	0	0	0	0	0
PD18022a	533	88	201	0	0	0	0	270	51	32	0	0	128	0	0	179	0	0	0	0	30	0	0	0	0	0	0	0	0	87
PD18024a	694	0	6050	0	0	0	0	2086	949	0	0	0	570	0	0	609	0	144	0	0	0	0	0	0	0	0	0	0	0	0
PD18031a	718	96	378	0	458	0	146	486	251	0	0	0	232	0	0	0	0	0	0	0	0	0	0	0	0	0	0	0	0	0
PD18037a	2935	234	1011	0	0	0	0	0	412	0	276	0	0	0	0	620	0	479	0	0	0	0	0	0	0	0	0	0	0	0
PD18045a	2514	3754	2282	0	0	0	0	1067	769	0	0	0	8776	0	0	0	0	0	0	0	0	0	0	0	0	303	0	0	0	0
PD18046a	915	91	0	0	1170	0	0	600	0	0	0	0	124	0	0	0	0	0	0	0	0	0	0	0	0	0	0	0	0	0
PD18047a	918	85	0	0	292	0	0	351	0	0	101	0	93	0	0	429	0	70	0	0	0	0	0	0	0	0	0	0	0	0
PD18048a	1250	79	762	134	786	0	0	223	274	0	178	0	240	0	0	796	0	0	0	0	0	58	0	0	0	0	0	0	0	0
PD18049a	938	416	424	0	0	0	83	279	242	0	0	0	214	0	0	701	0	0	0	0	89	0	0	0	0	0	0	0	0	0
PD18050a	1529	338	0	0	0	0	0	706	0	0	124	0	280	0	0	586	0	0	0	0	0	0	0	0	0	0	0	0	0	0
PD18100a	453	96	0	0	428	0	0	332	0	0	44	0	56	0	0	0	0	118	0	0	0	0	0	0	0	0	0	0	0	0
PD18101a	312	0	0	0	309	0	0	205	0	0	0	0	35	0	0	0	0	0	0	0	0	0	0	0	0	0	0	0	0	0
PD18116a	446	91	0	0	488	0	0	241	144	0	0	0	55	0	0	0	0	0	76	0	0	0	0	0	0	0	0	0	0	0
PD18149a	540	41	364	0	1109	0	0	200	0	0	0	0	63	0	0	0	0	0	0	0	0	0	0	91	0	0	0	65	0	94
PD18188a	614	65	240	0	387	0	76	306	0	0	74	0	68	0	0	305	0	0	0	0	95	0	0	0	0	0	0	0	0	0
PD18189a	585	496	0	0	1330	0	0	941	0	266	0	0	280	0	0	0	0	206	0	0	0	0	0	0	0	0	0	0	0	164
PD18247a	569	2849	543	0	0	0	172	0	0	0	0	0	5001	0	0	0	0	0	0	0	0	0	0	0	0	0	0	0	0	0
PD18251a	652	136	860	0	841	0	0	370	506	0	0	0	121	0	0	0	0	0	0	0	0	0	0	0	0	0	0	0	0	0
PD18257a	545	231	0	0	713	0	0	810	0	122	111	0	437	0	0	0	0	0	0	0	0	0	0	0	0	0	0	0	0	0
PD18258a	333	0	173	0	204	0	54	300	0	0	0	0	0	0	75	0	0	0	0	0	0	0	0	0	0	0	0	0	0	0
PD18259a	805	424	1974	0	0	0	0	2360	0	0	0	0	519	0	120	0	0	0	218	0	0	0	0	0	214	0	0	0	0	0
PD18264a	576	3326	0	0	0	0	191	305	0	64	0	0	1642	0	99	377	0	0	0	0	0	0	0	96	0	0	0	0	0	0
PD18269a	380	0	182	0	165	0	0	172	0	0	0	0	0	0	0	297	0	0	90	0	0	0	0	0	0	0	0	0	0	98
PD18728a	439	196	0	0	346	0	52	300	0	0	54	0	0	0	0	345	0	0	0	0	0	34	0	0	0	0	0	0	0	0
PD18730a	368	481	188	0	0	0	0	0	74	0	0	0	549	0	0	150	0	0	0	0	0	0	0	0	0	0	0	0	0	88
PD18733a	589	197	0	0	1081	0	0	764	244	0	65	0	76	0	0	0	0	0	0	0	0	0	0	0	0	0	0	0	0	0
PD18734a	885	103	0	0	727	0	0	1201	0	123	0	0	121	0	190	0	0	293	0	0	0	0	0	0	0	0	0	0	0	181
PD18748a	938	617	0	0	395	0	0	491	0	0	112	0	142	0	0	260	0	0	0	0	0	0	0	0	0	0	0	0	0	0
PD18749a	478	929	284	0	0	0	0	0	0	0	105	0	2297	0	0	565	0	0	0	0	0	0	0	0	0	0	0	0	0	0
PD18751a	704	53	0	0	502	0	0	406	0	0	0	0	40	0	0	0	0	60	0	0	0	0	0	0	0	0	0	0	0	138
PD18754a	625	696	0	0	0	0	0	269	0	130	185	0	277	0	0	339	0	68	0	0	0	0	0	0	0	0	0	0	0	0
PD18756a	658	52	0	0	382	0	48	243	0	0	83	0	35	0	0	0	0	98	0	0	0	0	0	0	0	0	0	31	0	0
PD18768a	685	74	0	0	562	0	0	440	111	0	85	0	41	0	0	492	0	0	0	0	0	0	0	63	0	0	0	0	0	0
PD18769a	335	489	0	0	842	0	0	0	0	0	0	0	1314	0	0	0	0	0	0	0	0	0	0	0	0	0	0	0	0	0
PD18771a	583	0	0	0	457	0	0	0	0	0	0	0	59	0	0	527	0	0	0	0	0	0	0	0	0	0	0	0	0	147
PD18775a	444	68	0	0	0	0	0	298	82	0	88	0	20	0	42	284	0	0	0	0	0	0	0	0	0	0	0	0	0	0
PD18776a	557	0	0	0	344	0	0	275	0	0	61	0	31	0	0	357	0	0	0	0	0	0	0	0	0	0	0	0	0	0
PD22036a	264	0	0	0	304	0	0	178	0	23	0	0	0	0	0	180	0	0	61	0	0	0	0	0	0	0	0	0	0	35
PD22251a	582	36	0	0	439	0	0	251	0	0	60	0	39	0	0	0	0	0	0	0	59	0	0	0	0	0	35	0	0	0
PD22355a	882	0	4160	0	0	0	0	3195	0	0	0	0	368	348	0	525	0	0	280	0	0	0	0	0	0	0	0	0	0	0
PD22357a	843	2295	0	0	1201	0	0	809	0	0	0	0	2569	0	0	0	0	0	0	0	0	0	0	0	0	0	0	0	0	0
PD22358a	265	50	2977	0	471	0	0	1031	396	0	81	0	882	0	0	0	0	0	0	0	0	0	0	0	0	0	0	0	0	0
PD22359a	486	221	0	0	829	0	0	204	0	0	73	0	0	0	0	0	0	0	0	0	0	0	0	0	0	0	0	0	0	0
PD22360a	274	160	4123	0	0	0	0	2195	736	0	0	0	739	0	0	0	0	0	0	0	0	0	0	0	280	0	0	0	0	0
PD22361a	872	1399	336	0	0	0	0	482	259	0	98	0	2084	0	0	365	0	0	0	0	0	0	0	0	0	0	0	0	0	0
PD22362a	283	288	0	0	0	0	85	722	333	0	140	0	95	0	0	0	0	0	0	0	0	0	0	0	0	0	0	0	0	0
PD22363a	288	107	4335	0	0	268	0	2867	0	0	0	0	287	0	0	510	0	0	0	0	0	0	0	0	0	0	0	0	0	239
PD22364a	833	476	0	0	313	0	0	281	180	0	0	0	316	0	0	0	0	0	0	0	0	0	0	0	0	0	0	0	0	0
PD22365a	277	0	422	0	412	0	0	558	0	52	0	0	53	0	0	0	0	0	0	0	0	0	0	0	0	0	0	0	0	127
PD22366a	623	340	4291	0	0	0	0	1467	586	0	155	0	1572	0	0	771	0	0	0	0	0	0	0	0	0	0	0	0	0	0
PD23550a	714	404	0	0	0	0	0	494	0	0	320	0	139	0	0	793	0	0	0	0	0	0	0	0	0	0	0	0	0	0
PD23554a	0	0	3541	0	0	323	0	2062	0	0	0	0	432	0	0	413	0	0	0	0	0	0	0	0	0	0	0	124	0	0
PD23558a	546	379	4296	517	993	164	0	1726	547	0	0	0	584	0	0	0	0	0	137	0	0	0	0	0	0	0	40	0	0	199
PD23559a	628	228	1197	0	1231	0	0	1174	515	0	0	0	406	0	0	0	0	0	0	0	0	0	0	0	0	0	0	0	0	0
PD23560a	477	215	669	0	239	0	0	454	237	0	77	0	375	0	66	192	0	0	0	0	0	0	0	0	0	0	0	0	0	0
PD23562a	697	59	3983	0	478	0	0	626	328	0	0	0	597	0	0	432	0	0	0	85	58	0	0	0	0	0	0	0	0	0
PD23563a	0	41	3722	0	0	431	0	3028	0	0	93	0	245	0	0	268	0	0	0	0	0	0	0	0	391	0	0	0	0	0
PD23565a	1513	2647	0	0	0	0	0	1553	688	0	0	0	2449	0	0	0	0	0	0	0	0	0	0	0	0	0	0	0	0	0
PD23566a	555	0	3593	0	0	0	0	1864	361	0	0	0	79	0	0	0	0	0	212	0	0	0	0	0	0	0	0	0	0	0
PD23567a	445	0	3106	0	0	231	0	2546	0	0	0	0	34	0	0	496	0	0	0	0	94	0	0	0	0	0	0	0	0	240
PD23569a	106	14	355	0	0	0	29	194	141	0	0	65	43	0	0	103	0	0	0	0	0	0	0	0	0	0	0	0	0	0
PD23570a	419	632	0	0	606	0	0	165	0	0	126	0	295	0	0	0	0	0	0	0	0	0	0	0	0	0	0	0	0	0
PD23574a	580	280	6697	0	0	0	172	1802	0	0	0	0	2386	267	0	907	0	0	0	0	0	0	0	0	0	0	0	0	0	0
PD23577a	407	41	1624	0	526	0	0	609	166	0	0	0	143	0	0	401	0	0	0	0	0	0	0	0	0	0	0	48	0	0
PD23578a	0	0	3042	0	0	337	0	2327	0	0	0	0	244	0	0	698	0	0	0	0	0	0	0	0	0	0	0	0	0	190
PD24182a	482	274	3518	0	802	0	0	1201	659	0	0	0	2197	0	0	0	0	0	0	0	0	0	0	0	0	401	0	0	0	0
PD24186a	323	0	3580	0	0	0	0	1264	601	0	0	0	262	0	0	1101	50	0	0	0	0	0	0	0	0	303	0	0	0	0
PD24190a	334	178	1270	0	2267	0	0	2055	817	0	0	0	576	0	0	0	1962	345	0	0	0	0	0	0	0	0	0	0	0	0
PD24191a	273	55	3319	0	514	153	0	671	529	0	0	0	144	0	0	457	0	0	0	0	0	0	0	0	0	0	0	0	0	0
PD24192a	695	280	8544	0	0	0	0	3024	1073	0	220	0	1913	0	0	1684	0	0	0	0	0	0	0	0	0	390	0	0	0	0
PD24194a	553	5324	1181	0	0	0	0	0	878	0	0	378	5378	0	0	0	0	0	0	0	0	0	0	0	0	0	0	0	0	0
PD24195a	469	69	0	0	1070	0	0	401	0	0	0	0	30	0	0	0	0	0	0	0	0	0	0	0	0	0	0	0	0	198
PD24196a	339	108	635	0	457	0	0	665	0	119	44	0	249	0	0	0	0	0	0	0	0	0	0	0	0	0	0	0	0	0
PD24197a	0	232	8162	0	0	0	0	9134	957	0	0	0	455	0	0	0	0	0	0	0	0	0	0	0	505	0	0	0	0	766
PD24199a	556	137	658	0	573	0	0	322	341	0	67	0	196	0	0	0	0	0	0	0	0	0	0	0	0	0	0	0	0	0
PD24200a	70	0	460	0	0	0	0	235	31	0	0	0	23	0	0	152	0	0	0	0	0	0	0	0	0	0	0	0	0	0
PD24201a	1066	460	4639	0	993	0	0	7875	2343	0	654	0	1247	0	0	0	0	0	0	0	0	0	0	0	1196	0	0	0	0	0
PD24202a	626	193	3373	0	594	0	0	1595	0	69	0	0	877	0	0	448	0	0	0	0	0	0	0	0	0	0	0	0	0	0
PD24204a	1465	0	368	0	0	0	0	0	130	0	0	0	0	0	91	449	0	289	0	0	0	0	0	0	0	0	0	0	0	0
PD24205a	366	123	3068	0	1031	358	0	2442	428	0	159	0	434	0	0	0	0	0	0	0	0	0	0	245	0	0	0	0	0	271
PD24206a	432	293	0	0	862	0	0	1169	440	0	0	0	213	0	0	0	0	0	0	0	0	0	0	0	0	0	0	0	0	197
PD24207a	1149	1136	344	0	0	0	81	220	209	32	0	0	1014	0	0	556	0	0	0	0	0	0	0	0	0	0	0	0	0	0
PD24208a	0	15722	0	0	0	0	0	0	0	0	0	0	9901	0	0	0	0	0	0	0	0	0	0	0	0	0	0	0	0	0
PD24209a	281	1945	1488	374	255	0	0	640	140	0	0	0	4839	0	0	0	0	0	0	0	0	0	0	0	0	0	0	0	0	201
PD24212a	519	366	3201	0	1006	0	0	3753	0	0	376	0	472	0	0	0	0	0	0	0	0	0	0	0	0	0	0	0	0	357
PD24214a	1255	0	0	0	778	0	0	584	0	0	0	0	0	0	0	0	0	459	0	0	0	0	0	0	0	0	0	0	0	0
PD24215a	324	155	1236	0	0	0	0	1883	1283	158	0	0	536	0	0	598	0	0	0	0	0	0	0	0	0	0	0	0	0	0
PD24216a	673	2764	0	0	0	0	0	0	0	0	0	0	2583	0	0	3317	0	0	0	0	0	0	0	0	0	0	0	0	0	0
PD24217a	0	4123	0	0	0	0	0	0	0	0	0	513	10668	0	0	0	0	0	0	0	0	0	0	0	0	0	0	0	0	0
PD24218a	462	85	0	0	1067	0	0	396	331	0	0	0	86	0	0	561	0	0	0	0	0	0	0	0	0	0	0	0	0	297
PD24219a	1733	0	480	0	0	0	0	333	0	0	0	0	55	0	0	716	0	0	0	0	0	0	0	0	0	0	0	0	0	0
PD24220a	1098	192	0	0	709	0	0	668	0	67	0	0	719	0	155	0	0	0	0	0	0	0	0	0	0	0	0	0	0	0
PD24221a	192	0	558	0	163	0	18	274	344	0	0	0	113	0	0	383	0	152	0	0	51	0	0	0	0	0	0	0	0	40
PD24223a	898	866	0	0	556	0	0	644	0	0	51	333	76	0	0	0	0	0	0	0	0	0	0	0	0	0	0	0	0	0
PD24224a	483	124	0	0	960	0	0	516	0	0	0	0	126	0	0	0	0	0	0	0	0	0	0	0	0	0	0	0	0	0
PD24225a	313	357	0	0	0	0	0	385	125	0	0	0	210	0	0	247	0	78	0	0	0	0	0	0	0	0	0	0	0	103
PD24302a	408	85	0	0	495	0	0	0	0	0	0	0	22	0	0	257	0	0	0	0	0	0	0	0	0	0	0	0	0	0
PD24303a	254	0	2154	0	0	0	0	884	0	0	0	0	655	0	0	551	0	0	0	0	0	0	0	0	0	0	0	0	0	0
PD24304a	146	0	2763	0	0	0	0	3294	0	0	108	0	217	0	0	0	0	0	0	0	0	0	0	0	322	0	0	0	0	0
PD24306a	137	0	1543	0	0	0	0	1038	152	0	55	0	185	0	0	0	0	0	0	86	0	0	0	0	0	89	0	47	0	0
PD24307a	366	50	0	0	715	0	67	354	0	0	0	0	39	0	0	0	0	0	0	0	0	0	0	0	0	0	0	0	0	0
PD24308a	790	0	1510	0	752	0	0	0	402	0	65	0	323	0	0	907	0	0	0	0	0	0	0	0	0	0	0	0	0	0
PD24314a	771	46	354	0	660	0	0	620	318	100	114	0	200	0	0	476	0	206	0	0	0	0	0	0	0	0	0	0	0	0
PD24318a	668	0	182	0	286	0	0	291	184	0	0	0	86	0	0	491	0	0	0	0	0	0	0	0	0	139	0	0	0	215
PD24322a	933	591	980	0	266	0	162	271	283	0	0	0	903	0	0	474	0	0	0	0	0	0	0	0	0	0	0	0	0	0
PD24325a	1282	97	3500	0	1255	0	0	899	777	109	0	0	1360	0	0	1103	0	0	0	0	0	0	0	0	0	0	0	0	0	0
PD24326a	0	11573	0	0	0	0	0	0	0	0	0	0	10253	0	0	0	0	1793	0	0	0	0	0	0	0	0	0	0	0	0
PD24327a	734	5955	0	0	0	0	253	674	621	139	0	0	7028	0	0	776	0	0	0	0	0	0	0	0	0	0	0	0	0	0
PD24329a	932	127	260	0	0	0	0	320	0	0	52	0	58	0	34	235	0	87	0	0	0	0	0	0	0	0	0	0	0	0
PD24332a	742	133	0	0	0	0	43	609	164	0	0	0	41	0	0	185	0	0	0	0	0	0	0	0	0	0	0	0	0	0
PD24333a	0	0	0	0	0	0	0	0	0	0	0	0	0	0	0	0	22884	0	0	0	0	0	0	0	0	0	0	0	0	0
PD24335a	1523	188	665	0	251	0	0	519	0	0	56	0	278	0	0	290	0	60	0	0	0	0	0	0	0	0	0	0	0	113
PD24336a	340	315	0	0	807	0	0	795	0	0	0	0	207	0	0	631	0	0	0	0	0	0	0	0	0	0	0	0	0	242
PD24337a	340	0	2541	0	403	92	0	1410	224	0	146	0	370	0	0	0	0	0	0	0	0	0	0	0	0	176	0	0	0	0
PD3851a	416	81	197	0	0	0	36	559	0	0	0	0	27	0	0	306	0	71	0	0	0	0	0	0	0	0	0	0	0	121
PD3890a	347	113	2877	0	0	0	0	694	561	0	211	0	777	0	0	0	0	0	0	0	0	0	0	0	0	0	0	0	0	0
PD3904a	224	277	1838	0	662	0	128	1422	0	0	209	0	481	0	0	0	0	0	0	0	0	0	0	179	0	0	0	0	0	244
PD3905a	267	182	1810	0	0	0	0	900	272	0	0	110	509	0	0	0	0	0	202	0	0	45	0	0	220	0	0	80	0	0
PD3945a	0	264	3439	0	1101	313	0	3178	408	161	237	0	669	0	0	775	0	0	0	0	0	0	0	0	0	0	0	0	0	0
PD3989a	705	293	0	0	402	0	0	477	175	0	117	0	66	0	0	0	0	0	0	0	0	0	0	0	0	0	0	0	0	0
PD4005a	392	685	1866	0	0	0	0	841	0	0	147	0	1549	0	0	558	0	0	0	0	0	0	0	0	0	0	0	0	0	0
PD4006a	623	84	5673	0	0	0	0	2329	467	0	0	0	252	0	0	0	0	0	144	0	0	0	0	0	0	0	0	0	0	0
PD4069a	717	80	0	0	0	0	135	375	0	0	0	0	0	0	232	246	0	296	0	0	0	0	0	0	0	0	0	0	0	0
PD4072a	0	13863	0	0	0	0	0	0	0	0	0	0	14067	0	0	0	0	0	0	0	0	0	0	0	0	0	0	0	0	0
PD4076a	740	225	0	0	667	0	110	326	0	0	0	0	20	0	0	0	0	0	0	0	0	0	0	0	0	0	0	0	0	0
PD4085a	609	61	0	0	728	0	0	877	155	0	0	0	96	0	0	0	0	0	0	0	0	0	0	0	0	0	0	0	0	175
PD4086a	297	202	386	0	0	0	0	160	126	0	58	0	419	0	0	300	0	0	0	0	0	0	0	0	0	0	0	0	0	0
PD4088a	581	88	316	0	0	0	0	249	0	69	69	0	101	0	0	0	0	215	0	0	0	0	0	0	0	0	0	0	0	0
PD4103a	1182	625	0	0	696	0	0	1040	469	0	337	0	576	0	0	0	0	290	0	0	0	0	0	0	0	0	0	0	0	0
PD4107a	275	711	3710	0	969	0	250	2948	532	0	0	0	182	293	0	0	0	0	0	0	0	0	0	0	0	0	0	0	0	0
PD4109a	1713	451	2225	0	2055	0	0	1464	0	305	320	0	1775	0	0	0	0	0	0	0	0	0	0	0	0	0	0	0	0	0
PD4115a	453	94	3630	0	633	0	0	2580	648	64	0	0	383	118	0	596	166	0	0	0	0	0	0	0	0	0	0	0	0	380
PD4116a	0	286	3117	353	587	240	0	1789	309	0	0	0	815	0	0	314	0	0	251	0	0	0	0	0	0	0	104	0	0	0
PD4192a	613	194	1804	0	0	0	0	0	667	0	0	0	554	0	0	0	0	0	0	0	0	0	0	0	377	0	79	0	0	0
PD4194a	428	113	0	0	280	0	0	291	0	0	0	0	199	0	0	0	0	0	0	0	0	0	0	0	0	0	0	0	0	115
PD4198a	1040	571	0	0	1414	0	0	748	469	0	0	0	272	0	0	0	0	0	0	0	0	0	0	0	0	0	0	0	0	0
PD4199a	661	2566	283	0	220	0	208	415	0	0	0	0	2510	0	0	0	0	0	0	0	0	0	0	81	0	0	0	0	0	0
PD4225a	958	98	0	0	410	0	0	305	0	0	0	0	43	0	0	0	0	0	139	0	0	0	0	0	0	0	0	0	0	0
PD4248a	320	97	0	0	825	0	0	593	0	0	0	0	136	0	0	0	0	0	0	0	0	0	0	0	0	0	0	0	0	222
PD4252a	948	0	0	0	1071	0	0	585	354	0	0	0	163	0	0	0	0	372	0	0	0	0	0	0	0	0	0	0	0	277
PD4255a	775	0	0	0	1478	0	0	784	424	0	0	0	215	0	0	0	0	875	0	0	0	0	0	0	0	0	0	0	0	0
PD4261a	491	22	0	0	588	0	0	221	0	0	0	0	34	0	0	329	0	0	107	0	0	0	0	0	0	0	0	0	0	0
PD4264a	944	255	0	0	562	0	0	269	0	0	85	0	0	0	0	0	0	0	0	0	0	0	0	0	0	0	0	0	0	0
PD4266a	415	816	337	0	0	0	61	0	0	0	0	0	370	0	0	386	0	0	0	0	0	0	0	0	0	0	0	0	0	0
PD4267a	683	126	0	0	514	0	0	266	0	0	56	0	472	0	0	0	0	0	0	0	0	0	0	0	0	0	0	0	0	0
PD4315a	717	456	474	0	0	0	143	613	0	0	0	0	490	0	0	335	0	154	0	0	0	0	0	0	0	0	0	0	0	0
PD4604a	514	122	3045	0	0	0	76	2655	640	0	409	0	658	0	0	405	0	0	291	0	0	0	0	0	365	136	0	0	0	0
PD4605a	1031	0	301	0	0	0	0	275	0	0	175	0	231	0	0	505	0	0	0	0	82	0	0	0	0	0	0	0	0	46
PD4606a	415	13	169	0	0	0	0	115	0	0	84	0	0	0	0	302	0	0	0	0	27	0	0	0	0	0	0	0	0	0
PD4607a	0	16351	0	0	0	0	0	0	0	0	0	0	9601	0	0	0	0	0	0	0	0	0	0	0	0	0	0	0	0	0
PD4613a	297	635	0	0	316	0	0	214	0	0	0	0	523	0	98	0	0	0	0	0	0	0	0	0	0	0	0	0	0	109
PD4826a	645	577	0	0	774	0	0	759	454	0	0	0	605	0	0	0	0	0	0	0	0	0	0	0	0	0	0	0	0	0
PD4833a	445	79	3783	0	0	0	0	741	466	0	75	0	489	0	0	161	0	0	82	0	0	0	0	0	0	0	0	0	0	75
PD4836a	675	97	1126	0	1210	0	0	579	221	0	97	0	295	0	0	0	0	0	0	0	0	0	0	0	0	0	0	0	0	0
PD4841a	578	157	2111	0	1481	0	0	1669	426	0	0	0	296	0	0	0	0	0	0	0	0	0	0	0	298	0	0	0	0	0
PD4844a	604	310	6634	0	2116	0	0	1484	376	0	0	321	961	0	0	0	0	0	0	0	0	0	0	0	0	0	0	0	0	0
PD4845a	615	0	1449	0	334	0	0	1435	674	0	0	0	76	0	0	554	595	0	0	0	0	0	0	0	0	0	0	0	0	0
PD4847a	1134	215	0	0	4565	0	0	2606	1911	0	0	0	149	0	0	0	0	459	0	0	0	0	0	0	0	0	0	0	0	0
PD4872a	0	479	0	0	0	0	0	3509	0	0	0	0	820	0	0	0	0	0	0	0	0	0	0	0	0	0	0	0	0	0
PD4874a	281	740	1979	0	1291	0	0	2388	0	0	0	0	2288	0	0	0	184	0	230	0	0	171	0	0	0	0	0	151	0	0
PD4875a	657	109	2268	348	585	0	0	1119	432	0	0	0	282	79	0	616	0	0	184	0	0	0	0	0	0	0	0	0	0	119
PD4876a	261	206	2502	0	390	0	0	630	364	0	94	0	457	0	0	0	0	0	0	0	0	0	0	0	0	0	0	0	0	0
PD4951a	245	48	861	0	416	0	0	590	0	0	105	0	242	0	60	150	0	0	0	0	0	58	0	0	0	0	0	0	0	0
PD4952a	1088	515	3693	469	1518	0	0	2668	423	0	0	0	932	0	0	0	0	0	298	0	0	0	0	0	0	0	0	0	0	424
PD4953a	345	94	2738	412	1090	0	117	1191	340	0	0	0	399	0	0	0	0	0	0	0	0	0	0	0	0	0	0	0	0	214
PD4954a	542	138	2540	175	0	0	0	871	269	0	109	0	464	0	0	458	0	0	0	0	0	0	0	0	0	0	0	0	0	193
PD4955a	323	212	2185	0	0	0	0	1777	187	108	208	0	356	139	0	353	0	0	0	0	0	0	0	0	0	0	0	0	0	218
PD4956a	848	0	7357	458	0	0	0	0	467	0	168	0	1458	0	0	823	0	0	0	0	0	0	0	0	0	0	0	0	0	0
PD4957a	354	180	932	0	0	0	0	799	0	0	0	0	259	0	74	572	0	0	0	0	0	0	0	0	0	0	0	0	0	106
PD4958a	349	529	1888	870	1101	0	181	2378	214	0	0	0	742	0	0	840	0	0	0	0	0	0	0	0	0	0	0	0	0	241
PD4959a	390	75	1579	0	0	175	0	1428	227	0	0	0	124	0	0	232	0	0	0	0	75	84	0	0	0	0	0	0	0	217
PD4962a	193	1526	538	0	545	0	0	1387	0	132	0	0	2519	0	0	0	0	0	0	0	0	0	0	0	0	0	0	0	0	0
PD4965a	838	89	0	0	736	0	0	376	0	0	121	0	49	0	0	338	0	154	0	0	0	0	0	0	0	0	0	0	0	0
PD4967a	503	549	290	0	377	0	0	296	0	0	0	0	850	0	0	234	0	0	0	0	0	0	0	0	0	0	0	0	0	124
PD4968a	1368	1009	0	0	0	0	0	981	262	0	281	0	79	0	0	797	0	0	0	0	0	0	0	0	0	0	0	0	0	0
PD4969a	288	39	0	0	268	0	0	102	0	0	0	0	0	0	0	258	0	74	0	0	0	0	0	0	0	0	0	0	0	0
PD4970a	774	89	0	0	515	0	0	378	0	0	107	0	135	0	0	408	0	0	0	0	0	0	0	0	0	0	0	0	0	0
PD4971a	1001	107	287	0	0	0	0	771	0	0	57	0	120	0	0	418	0	0	0	0	0	0	0	0	0	0	0	0	0	0
PD4972a	350	0	0	0	466	0	28	229	0	0	0	0	30	0	39	0	0	0	0	0	0	0	0	0	0	0	0	0	0	0
PD4975a	711	85	4049	0	1152	0	0	807	207	0	0	0	297	0	0	0	0	0	0	0	0	0	0	0	193	0	0	0	0	0
PD4976a	1775	0	1044	0	0	0	273	617	442	0	0	0	405	0	374	966	0	375	0	0	0	0	0	0	0	0	0	0	0	0
PD4977a	1079	22057	1102	0	0	0	0	0	0	685	0	0	17333	0	0	0	0	0	0	0	0	0	0	0	0	0	0	0	0	0
PD4978a	658	563	0	0	0	0	0	772	293	0	223	0	641	0	0	583	0	0	0	0	0	0	0	0	0	0	0	0	0	0
PD4980a	696	65	0	0	1417	0	0	958	0	0	0	0	162	0	0	0	0	496	0	0	0	0	0	0	0	0	0	0	0	0
PD4981a	648	26	0	0	388	0	0	305	0	0	0	0	0	0	0	0	0	99	99	0	0	0	0	0	0	0	0	0	0	95
PD4982a	602	24	0	0	219	0	0	263	0	0	96	0	0	0	0	267	0	0	0	0	0	0	0	0	0	0	0	0	0	0
PD4983a	444	49	169	0	619	0	0	0	0	0	0	0	0	0	0	391	0	0	0	0	0	0	0	0	0	0	0	0	0	88
PD4985a	572	55	258	0	222	0	0	217	0	0	0	61	42	0	0	408	0	0	64	0	0	0	0	0	0	0	0	0	0	98
PD4986a	414	41	484	0	230	0	0	230	155	0	0	0	0	0	0	295	0	0	122	0	0	0	0	0	0	0	0	0	0	0
PD5925a	325	247	3469	322	711	0	0	1127	328	0	91	0	1228	0	0	869	0	0	0	0	0	0	0	0	0	0	55	0	0	0
PD5928a	556	221	3052	0	453	0	0	2061	212	0	0	0	241	0	0	0	0	0	152	0	0	0	0	0	0	0	0	0	0	162
PD5930a	380	37	1902	0	355	0	0	593	199	0	0	0	477	0	0	0	0	0	0	0	0	0	0	0	0	0	0	0	0	0
PD5932a	546	139	4898	0	657	0	176	802	462	0	0	0	1757	0	0	619	0	0	0	0	0	0	0	0	0	0	0	0	0	0
PD5934a	513	107	6666	0	0	329	0	3137	529	0	0	0	294	0	0	0	0	0	0	0	0	0	0	0	0	0	0	0	0	0
PD5935a	896	89	5108	0	637	0	0	384	674	0	0	0	1220	0	0	658	0	0	0	0	0	0	0	0	0	0	0	0	0	0
PD5936a	779	220	0	0	656	0	0	535	0	0	84	0	19	0	0	484	0	0	0	0	0	0	0	0	0	0	0	0	0	0
PD5942a	1190	117	1752	0	1570	0	0	552	0	118	0	0	398	0	0	0	0	0	0	0	0	0	0	0	0	0	0	0	0	289
PD5944a	711	64	0	0	885	0	61	538	241	0	0	0	106	0	0	0	0	0	0	0	0	0	0	0	0	0	0	0	0	0
PD5945a	294	88	4685	0	0	0	0	2380	449	0	0	216	456	0	0	0	0	0	262	0	0	0	0	0	0	0	0	0	0	0
PD5946a	1231	132	448	0	763	164	140	307	209	0	0	0	169	0	0	0	0	343	0	0	0	0	0	0	0	0	0	0	0	0
PD5947a	484	156	0	0	378	0	0	330	0	0	0	0	211	0	0	0	0	56	0	0	0	0	0	0	0	0	0	0	0	160
PD5948a	743	0	8319	0	0	0	0	1098	2488	0	0	1404	516	0	0	0	0	0	0	0	0	0	0	0	0	601	0	0	0	0
PD5950a	942	0	0	0	417	0	0	312	233	0	0	0	33	0	0	0	0	187	0	0	63	0	0	0	0	0	0	0	0	0
PD5951a	1442	166	346	0	259	0	0	306	0	0	84	0	93	0	0	375	0	0	0	0	0	0	0	0	0	0	22	0	95	0
PD5953a	701	0	285	0	0	0	72	322	136	0	0	0	0	0	135	481	0	0	0	0	0	0	0	0	0	0	0	0	0	0
PD5956a	506	132	0	262	0	0	0	2022	0	0	0	0	92	0	172	172	0	267	0	0	0	0	0	0	0	0	0	0	0	455
PD5959a	619	217	264	0	0	0	145	227	159	0	75	0	66	0	0	615	0	0	111	0	0	0	0	0	0	0	0	0	0	0
PD5960a	257	95	925	166	303	159	105	1034	0	0	0	0	199	0	140	372	0	0	188	0	60	34	0	0	0	0	0	0	0	0
PD5961a	690	227	0	0	0	0	164	426	372	0	84	0	50	0	163	0	0	132	0	0	0	0	0	0	0	0	0	0	0	0
PD5964a	262	55	208	0	0	40	56	379	162	0	0	0	66	0	0	107	0	63	64	0	0	0	0	0	0	0	0	0	121	0
PD6016a2	556	396	268	0	0	0	61	130	0	0	0	0	207	0	0	289	0	0	0	0	0	0	0	0	0	0	0	0	0	0
PD6041a	524	30	0	0	406	0	50	216	0	0	0	0	39	126	0	376	0	0	0	0	0	0	0	0	0	0	0	0	0	0
PD6042a	400	555	1677	445	1165	0	0	1244	439	0	89	0	1100	0	0	0	0	0	0	0	0	0	0	0	0	0	0	0	0	0
PD6043a	0	6640	4184	0	0	0	0	4028	0	0	0	0	7321	0	0	0	0	589	0	0	0	0	0	0	0	0	0	0	0	0
PD6044a	700	54	0	0	615	0	0	382	134	0	0	0	132	0	0	341	0	0	0	0	69	0	0	0	0	0	0	0	0	142
PD6045a	392	516	0	0	0	0	0	451	0	40	43	0	187	0	0	464	0	65	0	0	50	0	0	0	0	0	0	0	0	122
PD6046a	772	106	0	0	818	0	129	777	0	0	0	0	104	0	0	0	0	267	0	0	0	0	0	0	0	0	0	0	0	0
PD6047a	1571	356	1428	0	2843	554	0	887	0	0	0	0	385	0	0	0	0	882	0	0	0	0	0	0	0	0	0	0	0	531
PD6048a	1003	126	541	0	0	0	0	731	0	0	256	0	191	0	0	0	0	250	0	0	0	0	0	0	0	0	0	0	0	0
PD6404a	0	0	0	0	5788	0	0	0	0	0	0	0	764	0	0	0	0	0	0	0	0	0	0	0	0	0	0	0	0	0
PD6405a	1078	6186	0	0	0	0	0	0	0	0	0	0	28052	0	0	0	0	0	0	0	0	0	0	0	0	0	0	0	0	0
PD6406a	361	0	2909	0	0	0	0	694	483	0	0	0	341	0	0	234	0	0	0	0	0	0	0	0	0	0	0	0	0	0
PD6409a	299	49	4057	0	0	0	0	2629	567	0	0	0	1090	0	0	0	0	116	0	0	0	0	0	0	0	0	0	0	0	0
PD6410a	617	0	4034	0	0	0	0	930	0	0	0	0	797	0	0	933	0	0	0	0	0	0	0	0	0	0	0	0	0	0
PD6411a	413	0	3643	0	0	0	0	952	388	0	108	0	743	0	0	366	0	0	0	0	0	0	0	0	0	0	58	0	0	0
PD6413a	300	239	1744	0	411	0	0	1100	0	0	0	0	635	0	0	0	0	0	0	0	0	0	0	0	0	0	0	0	0	154
PD6414a	387	115	115	0	350	0	0	145	226	0	0	0	41	0	0	226	0	0	0	0	0	0	0	0	0	0	0	0	0	150
PD6415a	547	486	3288	0	821	0	155	1477	659	0	0	0	1589	0	0	518	0	0	0	0	0	0	0	0	0	0	0	0	0	0
PD6416a	138	101	992	0	0	0	0	944	0	0	0	0	444	0	0	337	215	0	0	0	0	65	0	0	0	0	0	90	0	0
PD6417a	752	41	268	0	137	0	0	0	0	0	0	0	54	0	0	253	0	0	0	0	0	0	0	0	0	0	0	37	0	0
PD6418a	612	52	0	0	415	0	0	370	0	0	156	0	0	0	0	413	0	0	0	0	0	0	0	0	0	0	0	0	0	0
PD6422a	539	298	0	372	1772	0	0	1220	0	250	286	0	209	0	0	0	0	0	0	0	0	0	0	0	0	0	0	0	0	229
PD6466b	631	145	0	0	0	0	98	473	0	0	0	459	0	0	0	0	0	0	0	0	0	0	0	0	0	0	0	0	0	0
PD6684a	769	0	7804	0	0	0	223	0	1571	0	0	562	2744	0	0	0	0	0	0	0	0	0	0	0	0	0	0	0	0	0
PD6711a2	669	109	437	0	0	0	0	0	0	0	0	0	0	0	0	458	0	0	0	0	0	0	0	0	0	0	0	0	0	238
PD6719a	705	0	2204	0	0	0	0	1130	0	0	102	0	143	0	0	683	0	0	0	0	0	0	0	0	0	0	0	0	0	0
PD6720a	585	72	0	0	377	0	30	309	136	0	0	0	91	0	0	279	0	0	0	0	0	0	0	0	0	0	0	0	0	134
PD6721a	817	118	0	0	590	0	113	501	0	0	0	0	89	0	0	0	0	0	0	0	0	0	0	0	0	0	0	0	0	0
PD6722a	0	1842	1260	0	488	0	0	1140	0	238	301	0	4839	0	0	0	0	0	0	0	0	0	0	0	0	0	0	0	0	0
PD6727b	1703	278	2031	0	810	0	123	0	0	0	0	0	1097	0	0	633	0	0	0	0	0	0	0	0	0	0	0	0	0	0
PD6728b	445	69	796	129	227	0	0	373	143	0	88	0	149	0	0	0	0	0	0	0	0	0	0	0	0	0	0	0	154	0
PD6729a2	1087	73	1649	0	790	0	0	543	158	0	49	0	166	0	0	353	0	0	0	0	0	0	0	0	0	0	0	0	0	0
PD6730b	678	109	5089	552	952	0	0	1789	499	0	0	0	418	0	0	0	0	0	0	0	0	0	0	0	0	0	0	0	0	0
PD6731a2	379	1082	1567	0	0	217	0	1315	0	0	0	0	2844	0	0	1141	0	0	0	0	0	0	0	0	0	0	0	0	0	0
PD6732b	565	51	647	0	0	0	124	239	0	0	0	0	468	0	0	818	0	0	0	0	0	0	0	0	0	0	0	0	0	0
PD6733b	1083	475	816	0	489	0	0	0	361	117	0	352	688	0	0	0	0	0	0	0	0	77	0	0	0	0	0	0	216	0
PD7066a	649	25	1679	0	340	0	0	425	170	0	51	0	295	0	0	0	0	0	0	0	0	0	0	0	0	0	0	0	0	0
PD7067a	721	93	892	0	1636	0	0	1119	601	0	0	0	531	0	0	0	0	0	0	0	146	0	0	0	0	0	0	237	0	0
PD7069a	864	1001	0	0	0	0	0	875	0	0	0	0	1460	0	0	666	0	0	0	0	0	0	0	0	0	0	0	0	0	262
PD7199a	456	29	0	0	400	0	0	137	0	0	0	0	22	0	0	0	0	0	0	0	0	0	0	0	0	0	0	0	83	0
PD7201a	547	101	0	0	244	0	0	142	0	0	0	0	0	0	77	326	0	0	0	0	0	0	0	0	0	0	0	0	0	144
PD7202a	1553	298	0	0	743	0	263	1083	0	0	0	0	313	0	202	0	0	683	0	0	0	0	0	0	0	0	0	0	0	0
PD7203a	215	183	0	0	203	0	98	127	157	32	0	0	317	0	0	0	0	184	0	0	43	0	0	0	0	0	0	0	0	0
PD7204a	704	178	0	0	290	0	53	501	0	0	88	0	0	0	80	278	0	0	0	0	0	0	0	0	0	0	0	0	0	0
PD7205a	1017	1011	1050	0	536	0	0	930	581	0	0	0	2166	0	0	563	0	0	0	0	0	0	0	0	0	0	0	0	0	0
PD7206a	877	84	740	0	1109	0	0	1209	289	0	155	0	181	0	0	0	0	0	0	0	92	0	0	0	0	0	0	0	0	0
PD7207a	1074	297	0	0	768	0	314	292	0	0	0	0	0	0	107	0	0	0	0	0	0	0	0	0	0	0	0	0	0	0
PD7209a	655	84	0	0	0	0	0	213	0	0	0	0	31	0	0	316	0	153	58	0	0	0	0	0	0	0	0	0	0	151
PD7210a	515	24	0	0	432	0	0	280	0	0	66	0	0	0	0	0	0	0	0	0	0	0	0	0	0	0	0	0	0	0
PD7211a	603	56	4044	0	0	207	0	1991	257	0	0	0	400	0	0	419	0	0	0	0	0	0	0	0	0	0	0	0	0	306
PD7214a	386	87	102	0	0	0	0	175	0	0	101	0	0	0	0	491	0	0	104	0	45	0	0	0	0	0	0	0	0	0
PD7215a	350	910	1628	0	0	207	0	1362	0	0	117	333	1193	0	0	0	0	0	0	0	0	0	0	0	0	0	0	0	0	280
PD7217a	635	641	2544	0	854	0	0	1458	855	0	0	0	1314	0	0	696	0	0	0	0	0	0	0	167	0	0	0	0	0	0
PD7218a	556	46	0	0	156	0	0	0	72	0	0	0	0	0	44	200	0	141	75	0	0	0	0	0	0	0	0	0	180	0
PD7219a	452	4061	0	0	0	0	0	521	0	0	0	0	6082	0	0	501	0	0	0	0	0	0	0	0	0	0	0	0	0	0
PD7220a	931	391	0	0	613	0	143	143	178	0	0	0	223	0	0	0	0	0	0	0	0	0	0	83	0	0	0	0	0	0
PD7221a	811	367	0	0	0	0	0	229	0	0	111	0	204	0	0	315	0	0	0	0	0	0	0	0	0	0	0	0	0	0
PD7238a	760	349	0	0	494	0	0	207	0	0	86	0	0	0	0	193	0	0	0	0	0	0	0	0	0	0	0	0	0	126
PD7240a	1258	115	1450	0	1217	0	0	0	649	0	0	0	255	0	242	0	0	0	0	0	0	0	0	0	0	0	0	0	0	0
PD7243a	1166	456	946	0	1246	0	0	1417	0	0	0	0	286	0	0	0	0	747	0	0	0	0	0	0	0	0	0	0	0	506
PD7248a	827	94	6896	0	0	0	0	1544	1028	0	116	381	1468	0	0	684	0	0	0	0	0	0	0	0	0	0	0	0	0	0
PD7249a	594	854	445	0	694	0	0	707	247	70	0	0	889	0	79	0	0	0	0	0	0	0	0	0	0	0	0	0	0	0
PD7250a	682	0	6131	0	0	0	0	0	502	0	0	0	260	0	0	0	0	0	0	0	0	0	0	0	0	312	0	0	0	0
PD7304a	487	149	511	0	0	0	0	462	244	0	58	0	87	0	0	0	0	0	0	0	0	0	0	0	0	0	0	0	0	0
PD7305a	1506	288	0	0	0	0	211	800	0	0	0	0	486	216	0	609	0	635	0	0	0	0	0	0	0	0	0	0	0	0
PD7306a	1430	547	0	0	0	0	456	1862	1302	0	0	0	549	0	354	0	0	360	0	0	0	0	0	0	0	0	0	0	0	0
PD7307a	360	2180	788	0	363	0	80	933	0	0	0	0	3559	0	0	0	0	0	0	0	0	0	0	0	0	0	0	0	0	157
PD7316a	391	31	3029	0	0	0	0	1087	456	0	0	0	424	0	0	0	0	0	181	0	0	44	0	0	0	0	0	0	0	0
PD7321a	366	62	2613	0	391	226	103	651	234	0	63	0	1005	0	0	335	0	0	0	0	0	0	0	0	0	0	0	0	0	0
PD7322a	673	60	0	0	463	0	0	238	219	0	0	0	0	0	0	0	0	359	0	0	0	0	0	0	0	0	0	0	0	0
PD7341a	702	220	519	0	336	0	40	381	309	0	0	0	467	0	0	0	0	113	0	0	0	0	0	0	0	0	0	0	0	0
PD7344a	186	0	136	0	0	0	0	123	0	39	0	0	50	0	0	185	0	0	0	0	0	0	0	0	0	0	0	0	0	0
PD7426a	747	0	10056	0	0	0	0	0	0	0	0	0	5740	0	0	1953	0	0	0	0	0	0	0	0	0	0	0	0	0	0
PD7428a	0	144	8614	0	0	673	0	3712	910	0	0	561	1333	0	0	0	0	0	0	0	0	0	0	0	0	0	0	0	0	0
PD8609a	831	2267	0	0	901	0	0	0	0	0	0	0	1087	0	0	0	0	0	0	0	0	0	0	0	0	0	0	0	0	0
PD8610a	0	173	1493	282	609	212	0	1168	347	0	0	0	524	0	0	0	0	0	0	0	0	0	0	0	0	0	0	0	0	286
PD8611a	440	0	3598	0	1116	0	0	0	433	0	0	0	974	0	0	0	0	0	0	0	0	0	0	0	0	263	0	0	0	0
PD8612a	760	196	172	0	0	0	44	357	148	0	0	67	89	0	0	0	0	0	0	0	0	53	0	0	0	0	0	0	79	0
PD8614a	339	72	219	0	465	0	31	169	86	0	54	0	0	0	0	0	0	0	0	0	0	0	0	0	0	0	0	0	0	0
PD8615a	629	498	1083	0	0	0	0	0	231	0	90	0	1409	0	0	327	0	0	0	0	0	0	0	0	0	0	0	0	0	0
PD8617a	439	46	0	0	1060	0	0	291	0	0	60	0	0	0	0	0	0	0	0	0	0	0	0	0	0	0	0	0	0	0
PD8618a	476	56	0	0	0	0	0	211	0	0	0	0	47	0	54	565	0	0	93	0	0	0	0	0	0	0	0	0	0	0
PD8619a	871	102	889	0	717	0	0	409	317	0	0	0	264	0	0	0	0	0	0	0	0	0	0	0	0	0	0	0	0	0
PD8620a	358	644	197	0	283	0	0	0	133	0	74	0	883	0	0	0	0	0	0	0	0	0	0	0	0	0	0	0	81	0
PD8621a	560	32	4313	0	0	0	0	1225	650	0	0	0	582	0	0	0	0	0	155	0	0	0	0	0	0	402	0	0	0	139
PD8622a	414	57	230	0	257	0	0	242	142	0	0	0	64	0	0	267	0	0	0	0	0	0	0	0	0	0	0	0	0	131
PD8623a	407	239	288	0	0	97	0	287	141	0	104	0	0	0	0	452	0	0	0	0	0	0	0	0	0	0	0	0	0	0
PD8652a2	1137	165	7039	0	1117	0	0	2534	1209	0	0	0	1764	0	0	888	0	0	0	0	0	0	0	0	0	0	0	0	0	0
PD8660a2	2521	1739	9984	0	2903	0	1175	0	4234	0	0	0	3199	0	0	0	0	0	0	0	0	0	0	0	0	0	0	369	0	0
PD8828a	566	364	0	0	553	0	0	0	0	0	46	0	327	0	0	203	0	0	0	0	0	0	0	0	0	0	0	0	0	0
PD8830a	1396	82	3179	315	950	0	0	1476	537	0	0	0	309	0	0	0	0	0	0	0	0	0	0	0	0	0	0	0	0	0
PD8832a	420	288	14975	0	0	748	0	6339	2308	0	0	0	1002	0	0	0	0	0	0	0	0	0	325	0	0	0	0	0	0	0
PD8964a	578	170	5129	0	1613	0	0	2170	471	0	0	0	857	0	160	0	0	0	0	0	0	0	0	0	0	0	0	0	0	0
PD8965a	514	456	0	0	899	0	0	1139	477	0	155	361	445	0	0	0	0	0	0	0	0	0	0	0	0	0	0	0	0	0
PD8969a	568	298	1894	372	1547	0	0	844	0	0	275	0	1019	0	0	0	0	0	0	0	0	0	0	0	0	0	0	0	0	0
PD8973a	954	1421	250	0	0	0	0	0	0	141	0	0	2353	0	0	515	0	0	0	0	0	0	0	0	271	0	0	0	0	0
PD8977a	2063	103	460	0	0	0	97	510	272	0	0	0	0	0	0	537	0	0	0	0	0	0	0	0	0	0	0	0	0	0
PD8978a	923	89	3084	0	648	0	0	287	879	0	0	0	451	0	0	304	0	0	0	0	0	0	0	0	0	0	0	0	0	0
PD8979a	869	235	560	0	456	0	0	336	924	0	108	0	209	0	0	0	0	0	145	0	0	0	0	0	0	0	0	0	0	191
PD8980a	588	702	4279	887	1270	0	165	4680	549	0	364	0	1422	0	0	0	0	0	547	0	0	0	0	0	0	0	0	0	0	0
PD8981a	525	101	0	0	0	0	0	561	0	0	157	0	130	0	0	270	0	0	0	0	0	0	0	0	0	0	0	0	0	0
PD8982a	1223	537	9621	0	0	0	0	0	0	0	1016	0	7035	0	0	2123	0	0	0	0	0	0	0	0	0	0	0	0	0	0
PD8984a	1017	87	5527	249	0	0	0	0	564	0	0	0	1234	0	0	471	0	0	0	0	0	0	0	0	0	0	0	0	0	0
PD8995a	1922	2206	0	0	0	0	0	859	772	0	0	0	1639	185	0	0	0	0	0	0	0	0	0	0	0	0	0	0	0	0
PD8996a	1083	92	412	0	0	0	111	838	0	0	0	345	112	0	233	0	0	0	0	0	0	0	0	0	0	0	0	0	0	0
PD8997a	957	118	572	0	508	0	0	93	0	0	0	0	183	0	0	274	0	122	0	0	0	0	0	0	0	0	0	0	0	0
PD8998a	99	958	696	0	532	0	0	496	199	0	0	0	1785	0	0	0	0	0	0	0	0	0	0	0	0	0	0	0	0	0
PD8999a	441	55	0	0	491	0	0	287	0	0	71	0	0	0	0	0	0	0	0	0	0	0	0	0	0	0	0	0	0	0
PD9000a	366	355	3390	0	1071	0	0	2770	439	0	293	0	822	0	0	0	0	0	0	0	0	0	0	0	0	0	0	0	0	0
PD9001a	696	93	0	0	1137	0	0	0	0	0	101	0	0	0	0	507	0	0	0	0	0	0	0	168	0	0	0	0	0	0
PD9002a	498	211	1358	0	812	0	0	1517	1090	257	0	392	301	487	0	880	0	300	0	0	0	0	0	0	0	0	0	0	0	366
PD9004a	490	276	5491	0	0	0	0	1278	0	0	582	0	1274	0	0	1230	0	0	0	0	0	0	0	0	0	0	0	0	0	0
PD9009a	1065	2624	1332	0	0	0	0	1099	790	0	0	0	7984	0	0	0	313	0	0	0	0	0	0	0	0	0	0	0	0	0
PD9063a	634	29824	0	0	0	0	0	0	0	0	0	0	19231	0	0	0	0	0	0	0	0	0	0	354	0	0	0	0	0	0
PD9064a	828	253	5048	0	0	0	0	3827	0	0	0	595	845	0	0	485	0	0	466	0	0	0	0	0	0	0	0	0	0	0
PD9065a	544	290	0	0	457	0	0	327	0	0	72	0	0	0	0	0	0	516	0	0	0	0	0	0	0	0	0	0	0	0
PD9067a	479	172	0	0	236	0	43	266	75	0	64	90	125	0	0	0	0	0	0	0	0	0	0	0	0	0	0	0	0	0
PD9193a	427	0	319	0	0	0	0	222	0	38	0	0	174	0	0	153	0	161	0	0	0	0	0	0	0	0	0	0	0	184
PD9464a	657	345	798	0	980	0	0	1083	0	0	138	0	422	0	0	0	0	304	0	0	0	0	0	0	0	0	0	0	0	521
PD9467a	1038	136	0	0	0	0	83	625	0	0	118	0	45	0	0	371	0	0	0	0	0	0	0	0	0	0	0	42	0	0
PD9539a	2044	46	0	0	0	0	124	955	0	0	0	0	167	0	0	242	0	0	0	0	0	0	0	0	0	0	0	0	0	0
PD9541a	1358	285	206	0	0	0	0	494	0	0	86	0	0	0	0	274	0	0	0	0	0	0	0	0	0	0	0	0	0	0
PD9544a	437	92	0	0	581	0	0	277	0	0	0	0	0	0	0	0	0	0	0	0	0	0	0	0	0	0	0	0	0	0
PD9567a	934	207	293	0	460	0	35	754	191	0	69	0	233	0	0	251	0	80	0	0	0	0	0	0	0	0	0	0	0	0
PD9568a	1393	800	14445	0	0	0	0	5990	2545	0	753	0	4466	0	0	0	0	0	0	0	0	0	0	0	0	0	0	0	0	0
PD9569a	675	0	338	0	452	0	0	189	0	0	93	0	82	0	0	309	0	0	0	0	0	0	0	0	0	0	0	0	0	0
PD9570a	481	254	0	0	0	0	0	272	0	0	63	0	36	0	0	217	0	0	0	0	18	0	0	62	0	0	0	0	0	0
PD9571a	665	81	1499	0	1691	0	0	0	542	0	0	0	220	0	0	0	0	0	0	0	0	0	0	0	0	0	0	0	0	0
PD9572a	715	94	449	0	0	0	167	394	0	0	0	0	1055	0	0	1206	0	0	0	0	0	0	0	0	0	0	0	0	0	0
PD9573a	736	45	0	0	424	0	0	272	0	0	0	0	0	0	136	0	0	0	0	0	0	0	0	0	0	0	0	0	0	0
PD9574a	528	48	0	0	526	87	57	385	0	0	0	0	0	0	0	0	0	0	0	0	0	0	0	0	0	0	0	0	0	0
PD9575a	776	154	1363	0	1260	0	0	0	1024	0	0	0	621	0	0	1298	0	0	0	0	0	0	0	0	0	0	0	0	0	0
PD9576a	689	115	9229	0	0	0	0	3969	1004	0	0	1075	601	0	0	0	0	0	664	0	0	0	0	0	486	0	0	0	0	0
PD9577a	452	42	0	0	348	0	0	398	0	0	117	0	22	0	0	241	0	0	0	0	0	0	0	0	0	0	0	0	0	0
PD9578a	267	30	0	0	430	0	0	176	103	0	0	0	0	0	0	0	0	0	0	0	0	0	0	0	0	0	0	0	0	79
PD9579a	458	41	202	0	0	0	0	301	0	0	0	0	74	0	0	412	0	0	0	0	0	0	0	0	0	0	0	0	0	142
PD9581a	439	0	0	0	345	0	0	299	0	0	0	0	26	0	0	370	0	0	0	0	0	0	0	0	0	0	0	0	0	134
PD9582a	1045	115	457	188	0	0	101	399	149	0	0	0	189	0	45	0	0	0	0	0	0	0	0	0	0	0	0	48	0	0
PD9584a	820	90	300	0	298	0	0	195	207	0	66	0	53	0	0	493	0	0	0	0	0	0	0	0	0	0	0	0	108	118
PD9585a	809	88	4017	0	0	0	136	2817	0	0	0	0	1271	0	0	665	0	0	478	0	0	0	0	0	0	0	0	0	0	0
PD9589a	421	141	97	0	120	0	0	181	69	0	0	0	22	0	0	182	0	0	54	0	0	0	0	0	0	0	0	0	52	70
PD9591a	447	66	0	0	366	0	0	198	0	0	22	0	0	0	0	193	0	0	0	0	0	0	0	0	0	0	0	0	0	0
PD9592a	708	0	5483	0	0	0	0	1432	374	0	0	0	497	0	0	0	0	0	0	0	0	0	0	0	0	0	0	0	0	0
PD9593a	419	0	0	0	685	0	61	245	0	0	0	0	50	0	0	0	0	71	0	0	0	0	0	0	0	0	0	0	0	82
PD9595a	608	135	4521	0	0	0	0	2418	860	0	118	0	304	0	490	0	0	0	0	0	0	0	0	0	0	264	0	0	0	0
PD9597a	468	1211	324	0	0	0	99	0	0	0	0	0	807	0	0	0	0	0	0	0	0	0	0	0	0	0	0	0	0	0
PD9599a	1194	163	0	0	0	0	0	521	225	0	210	0	287	0	0	690	0	0	0	0	0	0	0	0	0	0	0	0	0	0
PD9600a	613	0	355	0	573	0	73	363	0	0	0	0	40	0	0	0	0	0	0	0	0	0	0	0	0	0	0	0	0	0
PD9605a	857	141	0	0	780	0	0	779	254	0	173	0	117	0	0	0	0	269	0	0	0	0	0	0	0	0	0	0	0	0
PD9606a	501	23	0	0	0	0	0	283	0	0	55	0	0	0	80	278	0	0	0	0	0	0	0	0	0	0	0	0	0	0
PD9694a	834	0	172	0	191	0	0	142	0	0	0	0	46	0	0	0	0	130	51	0	0	0	0	0	0	0	0	0	0	141
PD9696a	404	66	2756	0	0	0	0	1299	349	0	0	0	698	0	0	237	0	0	0	0	0	0	0	0	0	0	53	0	0	0
PD9702a	502	0	4399	0	599	0	0	466	605	0	84	0	1202	0	0	0	0	0	0	0	0	0	0	0	0	0	0	0	0	0
PD9752a	1125	275	0	0	624	0	0	820	0	0	94	0	387	0	51	0	0	0	0	0	0	0	0	0	0	0	0	0	0	95
PD9754a	683	40	0	0	440	0	0	462	142	0	0	0	41	0	0	0	0	0	0	0	0	0	0	0	0	0	0	0	0	85
PD9755a	480	74	0	0	0	0	72	428	0	0	0	0	0	0	136	376	0	0	0	0	0	0	0	0	0	0	0	0	0	140
PD9756a	566	1310	408	0	0	0	101	242	0	92	0	0	1012	0	0	476	0	0	0	0	0	0	0	0	0	0	0	0	0	0
PD9759a	676	158	0	0	630	0	0	394	113	0	83	0	41	0	0	0	0	0	93	0	0	0	0	0	0	0	0	0	0	0
PD9760a	1198	546	940	0	407	0	0	686	0	0	123	0	603	0	0	499	0	0	0	0	0	0	0	0	0	0	0	0	0	0
PD9761a	601	103	0	0	0	174	76	342	0	0	0	0	0	0	0	473	0	0	114	0	0	0	0	0	0	0	0	0	215	0
PD9842a	758	0	284	0	522	0	0	222	236	0	144	0	160	0	0	621	0	0	0	0	0	0	0	0	0	0	0	0	0	248
PD9843a	335	0	0	0	894	0	0	513	0	0	0	0	0	0	102	0	0	0	0	0	0	0	0	0	0	0	0	0	0	163
PD9844a	78	14	0	0	208	0	0	56	0	10	0	0	0	0	0	0	0	0	61	0	0	0	0	0	0	0	0	0	77	0
PD9845a	425	230	380	0	675	106	99	211	0	0	0	0	150	0	0	541	0	0	0	0	89	0	71	0	0	0	0	0	0	166
PD9847a	485	20	186	0	521	0	0	351	0	0	0	0	0	0	61	437	0	0	0	0	0	0	0	54	0	0	0	0	0	109
PD11353a	773	69	0	0	976	0	0	646	0	0	0	0	0	0	0	0	0	0	228	0	0	0	0	148	0	0	0	0	0	0
PD11354a	1079	0	0	0	551	0	59	732	148	0	0	0	45	0	90	0	0	0	0	0	0	0	0	0	0	0	0	0	0	0
PD11378a	578	28	0	145	0	0	0	472	0	0	0	0	0	0	0	611	0	53	126	0	40	0	0	0	0	0	0	0	0	262
PD12664a	751	47	385	0	641	0	0	501	0	0	174	0	151	0	0	0	0	0	0	0	0	0	0	0	0	0	0	0	0	0
PD13352a	418	71	0	0	409	0	0	208	0	0	160	0	43	0	0	413	0	0	0	0	0	0	0	0	0	0	0	0	0	0
PD13353a	778	129	0	0	511	0	92	315	0	0	0	0	159	0	42	402	0	0	0	0	0	0	0	0	0	0	0	0	0	120
PD13357a	914	663	469	0	0	0	0	0	0	0	0	0	1139	0	0	615	0	0	0	0	0	0	0	0	0	0	0	0	0	0
PD13358a	533	90	227	0	0	0	0	270	0	0	79	0	0	0	0	242	0	0	0	0	0	0	0	0	0	0	0	0	0	0
PD13359a	378	59	0	0	270	0	0	272	0	0	59	0	34	0	0	0	0	0	0	0	0	0	0	0	0	0	0	0	0	0
PD13632a	0	1583	6234	0	0	0	0	0	0	0	0	0	10821	0	0	0	0	0	0	0	0	0	0	0	0	0	0	0	0	0
PD13633a	1293	520	0	0	890	0	0	918	326	0	117	0	556	0	55	0	0	0	0	0	0	0	0	0	0	0	0	0	0	0
PD13769a	532	6220	0	0	0	0	0	521	0	0	0	0	4786	0	0	657	0	0	0	0	0	0	0	0	0	0	0	0	0	0
PD14434a	182	69	1797	0	0	249	0	1223	224	0	209	329	426	0	0	445	0	0	0	0	0	0	0	0	0	0	0	0	0	0
PD14436a	569	197	0	0	778	0	0	409	250	0	80	0	48	0	101	0	0	129	0	0	0	0	0	0	0	0	0	0	0	0
PD14443a	941	276	0	0	1238	0	148	738	0	0	0	0	233	0	0	0	0	240	0	0	0	0	0	0	0	0	0	0	0	0
PD14444a	379	75	432	0	614	0	0	135	0	0	0	0	33	0	0	0	0	0	78	0	0	0	0	0	0	0	0	0	0	0
PD14445a	414	0	0	0	0	0	0	298	0	0	0	0	59	0	0	330	0	0	0	0	0	0	0	0	0	0	0	0	0	121
PD14446a	621	354	1926	627	825	0	0	1342	382	0	419	0	873	0	0	0	0	555	0	0	0	0	0	0	0	0	0	0	0	0
PD14447a	580	0	266	0	0	0	0	258	0	0	73	0	51	0	0	481	0	0	0	0	0	0	0	0	0	0	0	0	0	0
PD14449a	799	99	0	0	586	0	0	553	0	0	0	0	105	0	128	351	0	0	0	0	0	0	0	0	0	0	0	0	0	328
PD14452a	677	150	1803	0	873	0	0	1047	0	0	0	0	417	0	0	0	0	0	0	0	0	105	0	0	0	0	0	0	0	0
PD14455a	1210	21419	0	0	0	0	0	0	0	0	0	0	17266	0	0	0	0	0	0	0	0	0	0	0	0	0	0	0	0	0
PD14466a	772	316	607	0	606	0	0	875	218	0	164	0	256	0	0	0	0	0	0	0	0	0	0	0	0	0	0	0	0	0
PD14469a	1693	576	2758	0	1178	0	0	0	1492	0	213	0	965	0	0	0	0	0	0	0	0	0	0	0	0	572	0	0	0	0
PD14470a	539	32	0	0	0	0	0	307	0	0	0	0	0	0	0	420	0	0	0	0	0	0	70	0	0	0	0	0	0	0
PD14474a	724	0	0	0	435	143	99	1025	179	0	0	0	167	0	0	431	0	0	0	0	0	0	0	0	0	0	0	0	0	0
PD17976a	887	0	0	0	330	0	29	190	0	0	0	0	60	0	0	263	0	74	0	0	0	0	0	0	0	0	0	0	0	0
PD17982a	527	0	0	0	258	0	71	264	0	0	0	0	29	0	0	254	0	0	0	0	0	0	0	0	0	0	0	0	0	0
PD17986a	343	43	1937	115	647	0	51	751	187	0	0	0	138	0	0	0	0	0	0	0	0	39	0	0	0	0	0	0	0	0
PD17996a	890	155	0	140	467	0	36	469	208	0	0	0	122	0	0	0	0	0	0	0	0	0	0	0	0	0	0	0	0	0
PD18006a	336	0	129	111	0	0	0	171	132	0	0	0	0	0	68	491	0	0	0	0	0	0	0	0	0	0	0	0	0	87
PD18007a	552	0	3337	195	1225	235	0	1327	542	0	0	0	223	0	0	173	0	0	0	0	0	0	0	0	0	0	0	0	0	185
PD18008a	532	231	2564	744	1018	0	0	3310	0	275	246	0	604	0	0	0	0	1150	0	0	0	0	0	0	0	0	0	0	0	0
PD18010a	916	0	675	0	391	0	0	296	269	0	0	0	71	0	0	518	199	0	0	0	87	0	0	0	0	0	0	0	0	215
PD18111a	426	32	0	148	787	0	0	0	0	0	0	0	0	0	56	0	0	0	0	0	0	0	0	0	0	0	0	0	0	123
PD18170a	932	481	773	0	0	0	0	0	369	0	110	0	413	0	0	511	0	0	0	0	57	0	0	0	0	0	0	0	0	0
PD18175a	1095	140	1052	0	1458	0	0	0	729	0	0	0	204	0	0	1246	0	0	0	0	397	0	0	0	0	0	183	0	0	0
PD18178a	506	46	0	0	867	0	0	379	0	0	0	0	42	0	0	0	0	0	177	0	0	0	0	192	0	0	0	0	0	190
PD18184a	2083	632	0	0	1749	0	0	1225	0	295	456	0	0	0	0	0	0	0	0	0	0	0	0	0	0	0	0	0	0	0
PD18233a	386	515	1011	0	439	0	0	1020	244	0	0	0	377	0	0	0	0	0	0	0	0	0	108	0	0	0	0	0	129	0
PD18237a	0	867	5152	0	0	314	258	6433	597	0	333	0	1660	0	0	0	0	0	301	0	0	0	0	0	0	0	0	0	0	0
PD18758a	408	0	0	0	414	0	92	0	0	0	0	0	28	0	118	339	0	0	0	0	0	0	0	0	0	0	0	0	0	0
PD18760a	680	0	0	0	0	0	62	413	191	0	0	0	0	0	0	0	0	189	0	0	0	0	0	0	0	0	0	0	0	0
PD18761a	375	71	0	0	0	0	0	212	152	0	51	0	0	0	0	446	0	0	0	0	0	0	0	0	0	0	0	0	0	0
PD18762a	360	46	0	0	243	0	0	209	0	0	37	0	0	0	0	408	0	0	0	0	0	0	0	0	0	0	0	0	0	0
PD18763a	425	73	0	0	0	0	81	319	90	0	0	0	16	0	0	307	0	0	84	0	0	0	0	0	0	0	0	0	0	0
PD18764a	369	21	0	0	0	0	0	247	0	0	32	0	0	0	0	312	0	0	0	0	0	0	0	0	0	0	0	0	0	0
PD18765a	680	31	434	0	392	0	0	139	156	0	69	0	0	0	43	290	0	0	0	0	0	0	0	0	0	0	0	0	0	86
PD18772a	468	91	0	0	117	0	0	235	0	0	19	0	0	0	0	181	0	0	0	0	0	0	0	0	0	41	0	0	0	0
PD18777a	578	0	1779	0	0	0	0	0	0	0	0	0	0	0	0	0	0	0	0	0	0	0	0	0	0	0	0	0	0	0
PD20341a	510	0	0	0	268	0	53	243	0	0	0	0	13	0	0	171	0	0	0	0	0	0	0	0	0	0	0	0	0	0
PD20342a	343	37	284	0	631	0	0	392	146	0	0	0	0	0	50	0	0	0	71	0	38	0	0	0	0	0	0	0	0	98
PD20343a	515	56	0	0	553	0	0	590	0	187	98	0	34	0	0	0	0	479	0	0	0	0	0	0	0	0	0	0	0	0
PD20344a	636	114	2726	498	913	0	101	1597	474	0	113	0	680	0	0	0	0	0	0	0	0	0	0	0	0	0	61	0	0	0
PD20345a	171	0	0	0	268	0	0	154	0	0	0	0	0	0	0	372	0	0	0	0	0	0	0	0	0	0	0	0	0	0
PD20347a	414	42	0	0	1293	0	0	315	0	0	94	0	62	0	0	0	0	0	0	0	0	0	0	0	0	0	0	0	0	0
PD20348a	484	53	295	0	699	0	67	460	194	0	0	0	56	0	0	0	0	0	0	0	0	0	0	0	0	0	0	0	0	0
PD20400a	461	29	0	0	387	0	0	223	0	0	40	0	42	0	0	305	0	0	67	0	0	0	0	0	0	0	0	0	0	0
PD20401a	809	79	635	0	502	0	0	497	0	0	0	0	141	0	0	0	0	105	0	0	0	0	0	0	0	0	0	0	0	0
PD20403a	666	109	168	0	0	0	0	307	224	0	0	0	22	0	0	153	0	0	129	0	59	0	0	0	0	0	0	0	0	0
PD20404a	859	149	427	0	394	0	0	641	161	0	261	0	0	0	0	316	0	0	0	0	0	0	0	0	0	0	0	0	0	0
PD20405a	471	65	280	0	138	86	71	0	0	0	0	0	32	0	0	246	0	0	0	0	0	0	0	0	0	0	0	0	0	0
PD4075a	514	41	0	0	0	0	0	282	0	0	0	0	0	0	0	197	0	0	77	0	0	0	0	0	0	0	0	39	0	0
PD6700a2	1592	0	0	0	0	0	0	539	0	0	0	856	0	0	0	0	0	0	0	0	0	0	0	0	0	0	0	0	0	0
PD6701a2	1148	0	628	284	993	0	132	435	392	0	0	0	120	0	0	0	0	0	0	0	0	0	0	0	0	0	0	0	0	238
PD7239a	328	246	0	0	1155	0	0	318	335	0	0	0	56	0	0	0	0	0	0	0	0	0	0	0	0	0	0	156	0	231
PD7308a	1874	99	2516	0	0	0	56	0	792	0	0	0	293	0	0	303	0	0	0	0	0	0	0	0	0	101	0	0	0	0
PD7310a	522	165	0	0	1014	0	81	306	0	0	0	0	79	0	0	0	0	0	0	0	0	0	0	0	0	0	0	0	109	0
PD7311a	606	54	0	0	400	0	0	204	127	0	0	0	29	0	0	0	0	239	0	0	0	0	60	0	0	0	0	0	0	0
PD7314a	807	0	0	0	513	0	0	380	0	0	126	0	38	0	0	424	0	0	0	0	0	0	0	0	0	0	0	0	0	0
PD7317a	542	188	241	0	636	0	66	260	185	0	0	0	53	0	0	0	0	0	0	0	0	28	0	51	0	0	15	0	0	0
PD7319a	576	0	498	0	224	0	0	0	0	0	0	0	0	0	135	301	0	0	0	0	0	0	0	66	0	0	0	0	0	70
PD7454a	1509	77	670	0	476	0	0	221	165	0	0	0	0	0	0	295	0	0	104	0	0	0	0	0	0	0	0	0	0	0
PD7455a	574	72	0	0	441	0	60	210	112	0	0	0	265	0	0	214	0	0	69	0	0	0	0	0	0	0	0	0	0	0
PD8823a	531	117	0	0	299	0	0	591	0	0	0	0	65	0	0	273	0	0	0	0	0	0	0	0	0	0	0	0	0	131
PD8826a	336	48	0	0	591	0	0	177	0	0	0	0	0	0	0	0	0	119	0	0	0	0	0	0	0	0	0	0	0	110
PD9066a	556	1270	172	0	157	0	0	212	0	45	0	0	492	0	0	348	0	0	139	0	0	0	0	0	72	0	0	0	0	137
PD9590a	207	80	0	0	261	0	0	252	143	0	0	0	108	0	0	0	0	0	0	0	0	0	0	0	0	0	0	0	0	72
PD9596a	365	41	120	0	380	0	0	65	0	0	0	0	32	0	0	345	0	64	0	0	0	0	0	0	0	0	0	0	0	109

## Sheet: (e)30Sigs_alpha0.01
(e) Exposure in 640 breast cancer WGS using thirty consensus signatures alpha 0.01
Sample	Signature.1	Signature.2	Signature.3	Signature.4	Signature.5	Signature.6	Signature.7	Signature.8	Signature.9	Signature.10	Signature.11	Signature.12	Signature.13	Signature.14	Signature.15	Signature.16	Signature.17	Signature.18	Signature.19	Signature.20	Signature.21	Signature.22	Signature.23	Signature.24	Signature.25	Signature.26	Signature.27	Signature.28	Signature.29	Signature.30	MMR_deficient_samples
PD11365a	0	0	0	0	0	0	0	0	3372	0	0	5823	0	0	0	0	0	0	0	0	0	0	0	0	0	4455	0	0	0	0	MMR_deficient
PD23561a	0	22458	0	0	0	0	0	0	0	0	0	0	35569	0	0	0	0	0	0	0	0	0	0	0	0	0	0	0	0	0	MMR_deficient
PD23564a	30319	0	0	0	0	33268	0	0	0	0	0	19859	0	0	0	0	0	0	0	0	0	0	0	0	0	0	0	0	0	0	MMR_deficient
PD23579a	0	0	0	0	19771	24112	0	0	0	0	0	18435	0	0	0	0	0	0	0	24991	0	0	0	0	0	0	0	0	0	0	MMR_deficient
PD24189a	0	0	0	0	0	12343	0	0	0	0	0	11224	0	0	0	0	0	0	0	6021	0	0	0	0	0	0	0	0	0	0	MMR_deficient
PD24193a	0	438	0	0	0	5679	0	0	0	0	0	4678	440	0	0	0	0	0	0	0	0	0	0	0	0	0	0	0	0	0	MMR_deficient
PD24320a	1546	0	0	0	0	0	0	0	0	0	0	4499	0	0	0	0	0	0	0	0	0	0	0	0	0	9649	0	0	0	0	MMR_deficient
PD5937a	0	29853	0	0	0	0	0	0	0	0	0	0	18248	0	0	0	0	0	0	27994	0	0	0	0	0	0	0	0	0	0	MMR_deficient
PD6412a	0	0	0	0	0	10847	0	4547	0	0	0	9791	0	0	0	0	0	0	0	0	0	0	0	0	0	0	0	0	0	0	MMR_deficient
PD9604a	1643	0	0	0	0	0	0	0	0	0	0	0	0	0	0	0	0	0	0	0	0	0	0	0	0	9025	0	0	0	0	MMR_deficient
PD7318a	0	0	0	0	0	9755	0	0	0	0	0	7532	0	0	0	0	0	0	0	3407	0	0	0	0	0	0	0	0	0	0	MMR_deficient
PD10010a	508	0	819	0	717	0	0	0	0	0	0	0	182	0	0	0	0	0	0	0	0	0	0	0	0	0	0	0	0	203
PD10011a	830	0	3375	0	0	0	0	0	1288	0	0	0	0	0	0	1177	0	0	0	0	0	0	0	0	1049	0	0	550	0	0
PD10014a	0	0	5148	0	0	839	0	4044	0	0	0	0	0	0	0	2093	0	0	0	0	0	0	0	0	0	0	0	0	0	0
PD11326a	730	0	5157	0	0	0	0	2920	0	0	0	0	819	0	0	0	0	0	0	0	0	0	0	0	0	0	0	0	0	0
PD11327a	0	0	6778	0	0	0	0	5139	0	0	0	0	796	0	0	0	0	0	0	0	0	0	0	0	0	0	0	0	0	0
PD11336a	1326	564	1619	0	0	0	0	1235	0	0	255	0	0	0	0	0	286	0	0	0	0	0	0	0	0	0	0	297	0	0
PD11337a	669	281	0	0	800	0	0	1025	0	0	0	0	295	0	0	0	0	0	0	0	0	0	0	0	0	0	0	0	0	0
PD11338a	747	0	0	0	1131	0	0	420	0	0	0	0	0	0	0	0	0	0	0	0	0	0	0	0	0	0	0	0	0	0
PD11339a	1163	0	0	0	0	0	0	304	0	0	0	0	0	0	0	824	0	0	0	0	0	0	0	0	0	0	0	0	0	236
PD11340a	801	300	0	0	1788	0	0	1329	0	0	538	0	306	0	0	0	0	0	0	0	0	0	0	0	0	0	0	0	0	0
PD11341a	464	219	0	0	419	0	0	459	0	0	0	0	89	0	0	0	0	0	0	0	0	0	0	0	0	0	0	0	0	0
PD11342a	666	823	0	0	1500	0	0	0	0	0	0	0	314	0	0	0	0	0	0	0	0	0	0	0	0	0	0	0	0	0
PD11343a	788	129	0	0	1383	0	0	538	0	0	0	0	104	0	0	0	0	0	0	0	0	0	0	0	0	0	0	0	0	0
PD11344a	0	5023	0	0	0	0	0	0	0	0	0	0	6004	0	0	0	0	0	0	0	0	0	0	0	0	0	0	0	0	0
PD11345a	0	4088	0	0	0	0	0	3852	0	0	0	0	2410	0	0	0	0	0	0	0	0	0	0	0	0	0	0	0	0	0
PD11346a	560	362	0	0	1138	0	0	0	0	0	0	0	230	0	0	0	0	0	0	0	0	0	0	0	0	0	0	0	0	0
PD11347a	484	352	0	0	1065	0	0	0	0	0	0	0	128	0	0	0	0	0	0	0	0	0	0	0	0	0	0	0	0	0
PD11348a	1591	148	0	0	1403	0	0	1686	0	0	0	0	180	0	0	0	0	0	0	0	0	0	0	0	0	0	0	0	0	0
PD11349a	1008	1097	0	0	3224	0	0	1253	0	0	0	0	864	0	0	0	0	0	0	0	0	0	0	0	0	0	0	0	0	0
PD11352a	795	402	0	0	1387	0	0	0	0	0	0	0	0	0	0	0	0	0	0	0	0	0	0	0	0	0	0	0	0	0
PD11355a	416	0	0	0	544	0	0	432	0	0	0	0	0	0	0	0	0	313	0	0	0	0	0	0	0	0	0	0	0	130
PD11357a	1197	0	0	0	1599	0	0	581	0	0	0	0	0	0	0	0	0	0	0	0	0	0	0	0	0	0	0	0	0	0
PD11358a	783	1525	0	0	2017	0	0	0	0	0	0	0	0	0	0	0	0	0	0	0	0	0	0	0	0	0	0	0	0	0
PD11359a	778	215	0	0	1207	0	0	465	0	0	0	0	0	0	0	0	0	0	0	0	0	0	0	0	0	0	0	0	0	0
PD11360a	940	143	0	0	1412	0	0	618	0	0	0	0	0	0	0	0	0	0	0	0	0	0	0	0	0	0	0	0	0	0
PD11361a	751	126	0	0	0	0	0	482	0	0	0	0	0	0	0	361	0	0	0	0	0	0	0	0	0	0	0	0	0	0
PD11364a	785	0	0	0	1553	0	0	0	0	0	0	0	0	0	0	0	0	0	0	0	0	0	0	0	0	0	0	0	0	0
PD11366a	730	156	0	0	1492	0	0	625	0	0	0	0	0	0	0	0	0	0	0	0	0	0	0	0	0	0	0	0	0	0
PD11367a	1183	0	2916	0	1904	0	0	1963	0	0	0	0	197	0	0	0	0	0	0	0	0	0	0	0	0	0	0	0	0	0
PD11368a	1263	1855	0	0	3206	0	0	0	0	0	0	0	502	0	0	0	0	0	0	0	0	0	0	0	0	0	0	0	0	0
PD11369a	1732	956	0	0	1743	0	0	1171	0	0	0	0	531	0	0	0	0	0	0	0	0	0	0	0	0	0	0	0	0	0
PD11370a	449	0	298	0	0	0	0	0	0	0	0	0	0	0	0	530	0	0	0	0	0	0	0	0	0	0	0	0	0	0
PD11372a	0	4467	0	0	0	0	0	0	0	0	0	0	9325	0	0	0	0	0	0	0	0	0	0	0	0	0	0	0	0	0
PD11374a	624	0	0	0	1416	0	0	0	0	0	0	0	96	0	0	0	0	0	0	0	0	0	0	0	0	0	0	0	0	245
PD11375a	735	0	0	0	498	0	0	509	0	0	0	0	0	0	190	0	0	0	0	0	0	0	0	0	0	0	0	0	0	0
PD11376a	1122	138	0	0	941	0	0	751	0	0	197	0	0	0	0	0	0	0	0	0	0	0	0	0	0	0	0	0	0	0
PD11379a	0	6634	0	0	0	0	0	0	0	0	0	0	12747	0	0	0	0	0	0	0	0	0	0	0	0	0	0	0	0	0
PD11380a	737	244	0	0	1738	0	0	0	0	0	0	0	0	0	0	0	0	0	0	0	0	0	0	0	0	0	0	0	0	0
PD11381a	438	70	0	0	1437	0	0	0	0	0	0	0	0	0	0	0	0	0	0	0	0	0	0	0	0	0	0	0	0	149
PD11383a	608	0	0	0	1292	0	0	581	0	0	0	0	96	0	0	0	0	0	0	0	0	0	0	0	0	0	0	0	0	0
PD11384a	573	112	0	0	917	0	0	0	0	0	0	0	121	0	0	0	0	0	0	0	0	0	0	0	0	0	0	0	0	0
PD11385a	502	0	0	0	758	0	140	485	0	0	0	0	0	0	0	0	0	0	0	0	0	0	0	0	0	0	0	0	0	0
PD11386a	838	523	0	0	1877	0	0	0	0	0	0	0	142	0	0	0	0	0	0	0	0	0	0	0	0	0	0	0	0	0
PD11388a	1420	0	0	0	833	0	0	1893	0	0	0	0	262	0	0	0	0	0	0	0	0	0	0	0	0	0	0	0	0	579
PD11389a	411	0	0	0	1265	0	0	0	0	0	0	0	0	0	0	0	0	0	0	0	0	0	0	0	0	0	0	0	0	0
PD11391a	264	0	0	0	686	0	0	199	0	0	0	0	0	0	0	0	0	0	0	0	0	0	0	0	0	0	0	0	0	122
PD11393a	1502	212	0	0	0	0	0	1427	709	0	0	0	0	0	0	0	0	817	0	0	0	0	0	0	0	0	0	0	0	0
PD11394a	1335	0	0	0	0	0	0	502	0	0	0	0	0	0	0	370	0	0	0	0	0	0	0	0	0	0	0	0	0	0
PD11395a	909	209	0	0	1429	0	0	777	0	0	0	0	0	0	0	0	281	183	0	0	0	0	0	0	0	0	0	0	0	0
PD11396a	624	67	0	0	855	0	0	709	0	0	0	0	0	0	0	0	0	0	0	0	0	0	0	0	0	0	0	0	0	178
PD11397a	1413	217	0	0	0	0	0	1329	0	0	0	0	370	0	0	896	0	599	0	0	0	0	0	0	0	0	0	0	0	0
PD11398a	671	0	660	0	550	0	0	464	0	0	0	0	0	0	0	0	0	0	0	0	0	0	0	0	0	0	0	0	0	0
PD11399a	1206	347	0	0	1093	0	0	848	0	0	0	0	0	0	0	0	0	0	0	0	0	0	0	0	0	0	0	0	0	0
PD11402a	781	0	0	0	1854	0	0	0	0	0	0	0	0	0	0	0	0	0	0	0	0	0	0	0	0	0	0	0	0	0
PD11462a	1021	0	0	0	965	0	0	724	0	0	0	0	128	0	0	0	0	0	0	0	0	0	0	0	0	0	0	0	0	0
PD11464a	700	1023	1214	0	0	0	0	0	0	0	0	0	1559	0	0	0	0	0	0	0	0	0	0	0	0	0	0	0	0	0
PD11465a	0	5115	0	0	10029	0	0	0	0	0	0	0	7406	0	0	0	0	0	0	0	0	0	0	0	0	0	0	0	0	0
PD11740a	698	69	0	0	1565	0	0	0	0	0	0	0	0	0	0	0	0	0	0	0	0	0	0	0	0	0	0	0	0	0
PD11741a	538	100	0	0	0	0	0	976	0	0	0	0	129	0	0	0	0	231	0	0	0	0	0	0	0	0	0	0	0	0
PD11742a	503	382	3374	0	0	0	0	1784	0	0	0	0	960	0	0	0	0	0	0	0	0	0	0	0	0	0	0	0	0	0
PD11743a	671	141	1474	0	1021	0	0	0	0	0	0	0	0	0	0	0	0	0	0	0	0	0	0	0	0	0	0	0	0	0
PD11744a	590	0	0	0	1291	0	0	0	0	0	0	0	0	0	0	0	0	0	0	0	0	0	0	0	0	0	0	0	0	0
PD11745a	472	220	0	0	769	0	0	1228	0	150	0	0	175	0	0	0	0	0	0	0	0	0	0	0	0	0	0	0	0	0
PD11748a	1001	0	7051	0	0	0	0	3144	0	0	0	0	564	0	0	0	0	0	0	0	0	0	0	0	0	0	0	0	0	0
PD11750a	0	0	7320	0	0	0	0	0	0	0	0	0	2757	0	0	0	0	0	0	0	0	0	0	0	0	0	0	0	0	0
PD11751a	1336	406	12840	0	0	0	0	0	0	0	0	0	2064	0	0	0	0	0	0	0	0	0	0	0	0	0	0	0	0	0
PD11752a	2562	0	2262	0	1994	0	0	0	0	0	0	0	0	0	0	0	0	816	0	0	0	0	0	0	0	0	0	0	0	0
PD11753a	1133	167	2394	0	1307	0	0	0	1086	0	0	0	0	0	0	0	0	0	0	0	0	0	0	0	0	0	0	0	0	769
PD11755a	304	0	1712	0	618	0	0	0	0	0	0	0	139	0	0	0	0	0	0	0	0	0	0	0	0	0	0	0	0	0
PD11756a	658	242	0	0	870	0	0	0	0	0	0	0	0	0	0	0	0	0	0	0	0	0	0	0	0	0	0	0	0	0
PD11757a	136	0	1328	0	0	0	0	0	0	0	0	0	487	0	0	0	0	0	0	0	0	0	0	0	0	0	0	0	0	0
PD11760a	1445	143	0	0	1531	0	0	0	0	0	0	0	0	0	0	0	0	971	0	0	0	0	0	0	0	0	0	0	0	0
PD11761a	389	226	835	0	1132	0	123	0	0	0	0	0	0	0	0	0	0	0	0	0	0	0	0	0	0	0	0	0	0	0
PD11762a	497	202	0	0	1034	0	0	0	0	0	0	0	0	0	0	0	0	0	0	0	0	0	0	0	0	0	0	0	0	0
PD11765a	404	0	0	0	909	0	0	370	0	0	0	0	105	0	0	0	0	0	0	0	0	0	0	0	0	0	0	0	0	212
PD11766a	340	103	0	0	1099	0	0	0	0	0	0	0	151	0	0	0	0	0	0	0	0	0	0	0	0	0	0	0	0	0
PD11767a	208	0	0	0	428	0	0	232	0	0	0	0	0	0	0	0	0	0	0	0	0	0	0	0	0	0	0	0	0	0
PD11769a	662	135	0	0	677	0	0	246	0	0	0	0	0	0	0	0	0	0	0	0	0	0	0	0	0	0	0	0	0	0
PD11816a	499	592	0	0	2230	0	0	0	0	0	0	0	688	0	0	0	0	0	0	0	0	0	0	0	0	0	0	0	0	0
PD11818a	419	0	0	0	1036	0	79	0	0	0	0	0	68	0	0	0	0	0	0	0	0	0	0	0	0	0	0	0	0	0
PD11819a	492	0	370	0	822	0	0	0	0	0	0	0	0	0	0	0	0	0	0	0	0	0	0	0	0	0	0	0	0	0
PD13162a	746	468	2062	0	0	0	0	0	0	0	0	0	2125	0	0	0	0	0	0	0	0	0	0	0	0	0	0	0	0	0
PD13163a	938	718	0	0	2982	0	0	0	0	0	0	0	713	0	0	0	0	0	0	0	0	0	0	0	0	0	0	0	0	0
PD13164a	607	161	0	0	1178	0	0	633	0	0	0	0	140	0	0	0	0	0	0	0	0	0	0	0	0	0	0	0	0	0
PD13165a	874	1232	0	0	0	0	0	2811	0	0	0	0	608	0	0	0	0	814	0	0	0	0	0	0	0	0	0	0	0	0
PD13166a	598	144	0	0	0	0	0	669	0	111	0	0	286	0	0	519	0	0	0	0	0	0	0	0	0	0	0	0	0	0
PD13167a	864	142	0	0	1241	0	0	0	0	0	0	0	156	0	0	0	0	0	0	0	0	0	0	0	0	0	0	0	0	0
PD13168a	872	396	0	0	1127	0	0	0	0	0	0	0	130	0	0	0	0	0	0	0	0	0	0	0	0	0	0	0	0	0
PD13296a	1760	0	11945	0	0	0	0	3056	0	0	0	0	1819	0	0	0	0	0	0	0	0	0	0	0	0	0	0	0	0	0
PD13297a	0	0	7110	0	0	0	0	0	0	0	0	0	0	0	0	0	0	0	0	0	0	0	0	0	0	0	0	0	0	7871
PD13298a	1400	0	1794	0	2435	0	0	1928	0	0	0	0	807	0	0	0	0	0	0	0	0	0	0	0	0	0	0	0	0	0
PD13299a	0	945	5912	0	0	0	0	0	0	0	0	0	3877	0	0	0	0	0	0	0	0	0	0	0	0	0	0	0	0	0
PD13302a	1370	291	0	0	2091	0	0	1142	0	0	0	0	0	0	0	0	0	0	0	0	0	0	0	0	0	0	0	0	0	0
PD13304a	623	0	0	0	500	0	0	393	0	0	0	0	0	0	0	0	0	0	0	0	0	0	0	0	0	0	0	0	0	0
PD13306a	546	362	0	0	1117	0	0	0	0	0	0	0	0	0	0	0	0	0	0	0	0	0	0	0	0	0	0	0	0	0
PD13307a	974	2050	0	0	0	0	0	1331	0	0	0	0	996	0	0	0	0	0	0	0	0	0	0	0	0	0	0	0	0	0
PD13310a	764	0	0	0	1066	0	0	0	0	0	0	0	0	0	0	0	0	0	0	0	0	0	0	0	0	0	0	0	0	0
PD13311a	319	0	2835	0	0	0	0	713	475	0	0	0	165	0	0	0	0	0	0	0	0	0	0	0	0	0	0	0	0	0
PD13312a	494	0	0	0	1482	0	0	0	0	0	0	0	57	0	0	0	0	0	0	0	0	0	0	0	0	0	0	0	0	0
PD13416a	635	0	0	0	783	0	116	403	0	0	0	0	0	0	0	0	0	0	0	0	0	0	0	0	0	0	0	0	0	0
PD13418a	1455	1098	2212	0	0	0	0	0	0	0	0	0	2042	0	0	0	0	0	0	0	0	0	0	0	0	0	0	0	0	0
PD13419a	407	72	285	0	0	0	0	0	0	0	0	0	0	0	0	326	0	0	0	0	0	0	0	0	0	0	0	0	0	0
PD13420a	769	0	627	0	0	0	0	0	0	0	0	0	0	0	0	465	0	0	0	0	0	0	0	0	0	0	0	0	0	0
PD13422a	545	121	0	0	617	0	0	520	0	0	0	0	0	0	0	0	0	0	0	0	0	0	0	0	0	0	0	0	0	0
PD13424a	1354	0	0	0	0	0	214	1705	450	0	0	0	229	0	0	0	0	0	0	0	0	0	0	0	0	0	0	0	0	0
PD13425a	0	5508	10998	0	0	0	0	0	0	0	0	0	17994	0	0	0	0	0	0	0	0	0	0	0	0	0	0	0	0	0
PD13426a	882	111	0	0	0	0	0	658	0	0	247	0	0	0	0	800	0	0	0	0	0	0	0	0	0	0	0	0	0	0
PD13427a	369	0	0	0	764	0	0	0	0	0	0	0	0	0	0	0	0	0	0	0	0	0	0	0	0	0	0	0	0	0
PD13428a	768	0	0	0	2030	0	0	0	0	0	0	0	165	0	0	0	0	0	0	0	0	0	0	0	0	0	0	0	0	457
PD13602a	1156	0	2101	0	1915	0	0	0	0	0	0	0	331	0	0	0	0	408	0	0	0	0	0	0	0	0	0	0	0	0
PD13603a	687	243	0	0	1094	0	0	704	0	0	0	0	333	0	0	0	0	0	0	0	0	0	0	0	0	0	0	0	0	0
PD13604a	0	47841	0	0	0	0	0	0	0	0	0	0	45260	0	0	0	0	0	0	0	0	0	0	0	0	0	0	0	0	0
PD13605a	381	0	0	0	0	0	0	483	0	0	0	0	57	0	0	316	0	0	0	0	0	0	0	0	0	0	0	0	0	0
PD13606a	1433	222	0	0	1655	0	0	2021	0	347	0	0	212	0	0	0	0	0	0	0	0	0	0	0	0	0	0	0	0	0
PD13607a	850	226	0	0	1218	0	0	685	0	0	0	0	307	0	0	0	0	0	0	0	0	0	0	0	0	0	0	0	0	0
PD13608a	944	694	0	0	0	0	0	0	0	0	0	0	1120	0	0	1346	0	0	0	0	0	0	0	0	0	0	0	0	0	0
PD13609a	0	1174	0	0	1547	0	0	0	0	0	0	0	1983	0	0	0	0	0	0	0	0	0	0	0	0	0	0	0	0	0
PD13618a	516	285	0	0	1031	0	0	0	0	0	0	0	0	0	0	0	0	0	0	0	0	0	0	0	0	0	0	0	0	0
PD13619a	676	66	0	0	1369	0	0	0	0	0	0	0	0	0	0	0	0	0	0	0	0	0	0	0	0	0	0	0	0	0
PD13620a	1478	143	0	0	1724	0	0	1055	0	0	0	0	196	0	0	0	0	0	0	0	0	0	0	0	0	0	0	0	0	0
PD13622a	1281	0	0	0	1376	0	0	998	0	0	0	0	0	0	0	0	0	698	0	0	0	0	0	0	0	0	0	0	0	0
PD13623a	599	1468	0	0	1388	0	0	0	0	0	0	0	343	0	0	0	0	0	0	0	0	0	0	0	0	0	0	0	0	0
PD13625a	2211	866	0	0	0	0	0	5178	0	0	0	0	0	0	0	0	2982	0	0	0	0	0	0	0	0	0	0	0	0	0
PD13626a	342	0	0	0	691	0	0	0	0	0	0	0	42	0	0	0	0	0	0	0	0	0	0	0	0	0	0	0	0	0
PD13627a	656	0	6389	0	0	0	0	0	838	0	0	0	556	0	0	0	0	0	0	0	0	0	0	0	0	0	0	0	0	0
PD13629a	541	407	0	0	1079	0	0	0	0	0	0	0	0	0	0	0	0	0	0	0	0	0	0	0	0	0	0	0	0	0
PD13630a	730	597	0	0	1978	0	0	0	0	0	0	0	801	0	0	0	0	0	0	0	0	0	0	0	0	0	0	0	0	0
PD13631a	517	172	0	0	1200	0	0	602	0	0	0	0	110	0	0	0	0	0	0	0	0	0	0	0	0	0	0	0	0	0
PD13752a	557	89	0	0	959	0	131	690	380	0	0	0	0	0	0	0	0	0	0	0	0	0	0	0	0	0	0	0	0	0
PD13753a	0	2365	1995	0	0	0	0	0	0	0	0	0	3634	0	0	0	0	0	0	0	0	0	0	0	0	0	0	0	0	0
PD13754a	745	0	825	0	0	0	0	0	358	0	0	0	0	0	0	576	0	0	0	0	0	0	0	0	0	0	0	0	0	0
PD13755a	589	0	414	0	0	0	0	0	0	0	0	0	0	0	0	684	0	0	0	0	0	0	0	0	0	0	0	0	0	246
PD13756a	519	0	0	0	905	0	0	462	0	0	0	0	0	0	0	0	0	0	195	0	0	0	0	0	0	0	0	0	0	0
PD13757a	378	319	0	0	0	0	75	548	0	0	0	0	164	0	0	0	0	0	0	0	0	0	0	0	0	0	0	0	0	0
PD13758a	405	0	0	0	1112	0	0	457	0	0	0	0	0	0	0	0	0	0	0	0	0	0	0	0	0	0	0	0	0	323
PD13760a	510	129	1813	0	0	0	0	1513	0	0	0	0	666	0	0	0	0	0	0	0	0	0	0	0	0	0	0	0	0	0
PD13761a	372	0	0	0	0	0	0	362	0	0	0	0	0	0	0	558	0	0	0	0	0	0	0	0	0	0	0	0	0	394
PD13762a	522	0	0	0	0	0	0	453	0	0	0	0	0	0	0	443	0	0	0	0	0	0	0	0	0	0	0	0	0	232
PD13763a	839	130	0	0	986	0	0	606	0	0	0	0	0	0	0	0	0	0	0	0	0	0	0	0	0	0	0	0	0	0
PD13764a	781	233	0	0	2303	0	0	1116	0	0	0	0	393	0	0	0	0	0	0	0	0	0	0	0	0	0	0	0	0	0
PD13765a	1217	0	0	0	0	0	318	1990	0	0	0	0	165	0	0	0	0	1786	0	0	0	0	0	0	0	0	0	0	0	0
PD13766a	0	1823	0	0	0	0	0	0	0	0	0	0	771	0	0	1241	0	0	0	0	0	0	0	0	0	0	0	0	0	0
PD13767a	618	254	0	0	880	0	0	548	0	0	0	0	0	0	0	0	0	0	0	0	0	0	0	0	0	0	0	0	0	337
PD13768a	555	0	0	0	796	0	0	0	0	0	0	0	0	0	0	0	0	0	0	0	0	0	0	0	0	0	0	0	0	0
PD13770a	606	114	0	0	1115	0	0	0	0	0	0	0	0	0	0	0	0	242	0	0	0	0	0	0	0	0	0	0	0	0
PD13771a	0	499	6219	0	0	0	0	4089	0	0	769	0	1511	0	0	0	0	0	0	0	0	0	0	0	0	0	0	0	0	0
PD14432a	437	0	0	0	738	0	0	410	0	0	0	0	0	0	0	0	0	0	0	0	0	0	0	0	0	0	0	0	0	282
PD14433a	848	1214	0	0	0	0	0	0	0	0	0	0	312	0	0	1206	0	0	0	0	0	0	0	0	0	0	0	0	0	0
PD14435a	1169	195	0	0	1282	0	0	811	0	0	0	0	256	0	0	0	0	0	0	0	0	0	0	0	0	0	0	0	0	0
PD14437a	1036	135	1104	0	0	0	0	1067	742	0	0	0	276	0	0	0	0	0	0	0	0	0	0	0	0	0	0	0	0	0
PD14439a	351	63	0	0	782	0	0	0	0	0	0	0	0	0	0	0	0	118	0	0	0	0	0	0	0	0	0	0	0	0
PD14441a	553	76	1304	0	1080	0	0	1416	0	0	0	0	230	0	0	0	0	0	0	0	0	0	0	0	0	0	0	0	0	0
PD14442a	439	39	0	0	831	0	0	435	0	0	0	0	0	0	0	0	0	0	0	0	0	0	0	0	0	0	0	0	0	0
PD14450a	254	69	0	0	888	0	0	0	0	0	0	0	0	0	85	0	0	0	0	0	0	0	0	0	0	0	0	0	0	0
PD14453a	1006	2271	4293	0	0	0	0	0	0	0	0	0	2344	0	0	0	0	0	0	0	0	0	0	0	0	0	0	0	0	0
PD14454a	610	102	0	0	818	0	0	771	0	0	0	0	206	0	0	0	0	0	0	0	0	0	0	0	0	0	0	0	0	0
PD14456a	747	0	0	0	796	0	0	433	0	0	0	0	0	0	0	0	0	0	0	0	0	0	0	0	0	0	0	0	0	0
PD14457a	1188	257	0	0	1959	0	295	0	0	0	0	0	0	0	0	0	0	865	0	0	0	0	0	0	0	0	0	0	0	0
PD14458a	520	0	0	0	454	0	0	340	0	0	0	0	0	0	0	0	0	0	0	0	0	0	0	0	0	0	0	0	0	196
PD14459a	654	123	0	0	865	0	0	0	0	0	0	0	0	0	0	0	0	442	0	0	0	0	0	0	0	0	0	0	0	0
PD14460a	1684	1970	0	0	0	0	0	0	0	0	0	0	868	0	0	0	0	0	0	0	0	0	0	0	0	0	0	0	0	0
PD14461a	590	0	461	0	0	0	0	0	0	0	0	0	0	0	0	384	0	0	0	0	0	0	0	0	0	0	0	0	0	0
PD14462a	642	434	0	0	1278	0	0	0	0	0	0	0	271	0	0	0	0	0	0	0	0	0	0	0	0	0	0	0	0	0
PD14465a	967	209	0	0	1268	0	0	650	0	0	0	0	0	0	0	0	0	0	0	0	0	0	0	0	0	0	0	0	0	0
PD14467a	673	59	0	0	797	0	0	0	0	0	0	0	93	0	0	0	0	0	0	0	0	0	0	0	0	0	0	0	0	0
PD14468a	583	101	0	0	863	0	0	0	0	0	0	0	0	0	0	0	0	0	0	0	0	0	0	0	0	0	0	0	0	0
PD14471a	1335	68	1094	0	0	0	0	771	0	0	0	0	0	0	0	0	0	0	0	0	0	0	0	0	0	0	0	0	0	0
PD14472a	618	183	0	0	1380	0	0	0	0	0	0	0	114	0	0	0	0	0	0	0	0	0	0	0	0	0	0	0	0	0
PD14473a	610	0	0	0	558	0	0	299	0	0	0	0	74	0	0	0	0	0	0	0	0	0	0	0	0	0	0	0	0	0
PD17973a	544	0	0	0	936	0	0	0	0	0	0	0	0	0	0	0	0	544	0	0	0	0	0	0	0	0	0	0	0	0
PD17981a	2403	1529	0	0	2071	0	0	0	0	0	0	0	0	0	0	0	0	959	0	0	0	0	0	0	0	0	0	0	0	0
PD17991a	440	43	0	0	738	0	0	0	0	0	0	0	0	0	0	0	0	0	0	0	0	0	0	0	0	0	0	0	0	0
PD17994a	502	202	0	0	0	0	0	0	0	0	0	0	74	0	0	526	0	0	0	0	0	0	0	0	0	0	0	0	0	0
PD18017a	470	143	0	0	1063	0	0	429	0	0	0	0	0	0	0	0	0	0	0	0	0	0	0	0	0	0	0	0	0	0
PD18020a	0	0	8509	0	0	0	0	4875	0	0	0	0	4387	0	0	0	0	0	0	0	0	0	0	0	0	0	0	0	0	0
PD18022a	532	91	0	0	0	0	0	515	0	0	0	0	128	0	0	333	0	0	0	0	0	0	0	0	0	0	0	0	0	0
PD18024a	669	0	7702	0	0	0	0	2173	0	0	0	0	558	0	0	0	0	0	0	0	0	0	0	0	0	0	0	0	0	0
PD18031a	708	90	0	0	1243	0	0	496	0	0	0	0	229	0	0	0	0	0	0	0	0	0	0	0	0	0	0	0	0	0
PD18037a	2935	234	2321	0	0	0	0	0	0	0	0	0	0	0	0	0	0	479	0	0	0	0	0	0	0	0	0	0	0	0
PD18045a	0	3754	6937	0	0	0	0	0	0	0	0	0	8776	0	0	0	0	0	0	0	0	0	0	0	0	0	0	0	0	0
PD18046a	915	215	0	0	1170	0	0	600	0	0	0	0	0	0	0	0	0	0	0	0	0	0	0	0	0	0	0	0	0	0
PD18047a	918	85	0	0	823	0	0	422	0	0	0	0	93	0	0	0	0	0	0	0	0	0	0	0	0	0	0	0	0	0
PD18048a	1274	0	0	0	3203	0	0	0	0	0	0	0	308	0	0	0	0	0	0	0	0	0	0	0	0	0	0	0	0	0
PD18049a	888	414	0	0	1873	0	0	0	0	0	0	0	215	0	0	0	0	0	0	0	0	0	0	0	0	0	0	0	0	0
PD18050a	1529	338	0	0	0	0	0	706	0	0	0	0	280	0	0	710	0	0	0	0	0	0	0	0	0	0	0	0	0	0
PD18100a	453	153	0	0	473	0	0	451	0	0	0	0	0	0	0	0	0	0	0	0	0	0	0	0	0	0	0	0	0	0
PD18101a	312	0	0	0	514	0	0	0	0	0	0	0	35	0	0	0	0	0	0	0	0	0	0	0	0	0	0	0	0	0
PD18116a	442	87	0	0	958	0	0	0	0	0	0	0	54	0	0	0	0	0	0	0	0	0	0	0	0	0	0	0	0	0
PD18149a	540	0	0	0	1901	0	0	0	0	0	0	0	128	0	0	0	0	0	0	0	0	0	0	0	0	0	0	0	0	0
PD18188a	614	134	0	0	1487	0	0	0	0	0	0	0	0	0	0	0	0	0	0	0	0	0	0	0	0	0	0	0	0	0
PD18189a	615	497	0	0	1421	0	0	1188	0	261	0	0	287	0	0	0	0	0	0	0	0	0	0	0	0	0	0	0	0	0
PD18247a	0	2848	0	0	0	0	0	0	0	0	0	0	6287	0	0	0	0	0	0	0	0	0	0	0	0	0	0	0	0	0
PD18251a	628	136	1253	0	973	0	0	0	494	0	0	0	0	0	0	0	0	0	0	0	0	0	0	0	0	0	0	0	0	0
PD18257a	545	343	0	0	835	0	0	810	0	0	0	0	437	0	0	0	0	0	0	0	0	0	0	0	0	0	0	0	0	0
PD18258a	333	0	0	0	432	0	0	300	0	0	0	0	0	0	75	0	0	0	0	0	0	0	0	0	0	0	0	0	0	0
PD18259a	1144	424	1974	0	0	0	0	2575	0	0	0	0	519	0	0	0	0	0	0	0	0	0	0	0	0	0	0	0	0	0
PD18264a	1506	3529	0	0	0	0	0	0	0	0	0	0	1643	0	0	0	0	0	0	0	0	0	0	0	0	0	0	0	0	0
PD18269a	380	0	0	0	0	0	0	354	0	0	0	0	0	0	0	462	0	0	0	0	0	0	0	0	0	0	0	0	0	189
PD18728a	429	205	0	0	1133	0	0	0	0	0	0	0	0	0	0	0	0	0	0	0	0	0	0	0	0	0	0	0	0	0
PD18730a	368	481	0	0	0	0	0	0	0	0	0	0	549	0	0	501	0	0	0	0	0	0	0	0	0	0	0	0	0	0
PD18733a	589	273	0	0	1391	0	0	764	0	0	0	0	0	0	0	0	0	0	0	0	0	0	0	0	0	0	0	0	0	0
PD18734a	1088	207	0	0	1078	0	0	1105	0	0	0	0	0	0	0	0	0	347	0	0	0	0	0	0	0	0	0	0	0	0
PD18748a	900	615	0	0	1296	0	0	0	0	0	0	0	145	0	0	0	0	0	0	0	0	0	0	0	0	0	0	0	0	0
PD18749a	0	929	0	0	0	0	0	0	0	0	0	0	2297	0	0	1433	0	0	0	0	0	0	0	0	0	0	0	0	0	0
PD18751a	704	94	0	0	641	0	0	466	0	0	0	0	0	0	0	0	0	0	0	0	0	0	0	0	0	0	0	0	0	0
PD18754a	625	696	0	0	0	0	0	807	0	0	185	0	277	0	0	0	0	0	0	0	0	0	0	0	0	0	0	0	0	0
PD18756a	658	87	0	0	414	0	0	342	0	0	131	0	0	0	0	0	0	0	0	0	0	0	0	0	0	0	0	0	0	0
PD18768a	669	125	0	0	1249	0	0	512	0	0	0	0	0	0	0	0	0	0	0	0	0	0	0	0	0	0	0	0	0	0
PD18769a	0	489	0	0	1177	0	0	0	0	0	0	0	1314	0	0	0	0	0	0	0	0	0	0	0	0	0	0	0	0	0
PD18771a	579	0	0	0	1140	0	0	0	0	0	0	0	55	0	0	0	0	0	0	0	0	0	0	0	0	0	0	0	0	0
PD18775a	483	65	0	0	0	0	0	303	0	0	106	0	0	0	0	370	0	0	0	0	0	0	0	0	0	0	0	0	0	0
PD18776a	619	0	0	0	0	0	0	272	0	0	0	0	0	0	0	737	0	0	0	0	0	0	0	0	0	0	0	0	0	0
PD22036a	259	0	0	0	605	0	0	181	0	0	0	0	0	0	0	0	0	0	0	0	0	0	0	0	0	0	0	0	0	0
PD22251a	582	75	0	0	847	0	0	0	0	0	0	0	0	0	0	0	0	0	0	0	0	0	0	0	0	0	0	0	0	0
PD22355a	1231	0	4966	0	0	0	0	3195	0	0	0	0	368	0	0	0	0	0	0	0	0	0	0	0	0	0	0	0	0	0
PD22357a	0	2295	0	0	2854	0	0	0	0	0	0	0	2569	0	0	0	0	0	0	0	0	0	0	0	0	0	0	0	0	0
PD22358a	0	0	4038	0	1227	0	0	0	0	0	0	0	891	0	0	0	0	0	0	0	0	0	0	0	0	0	0	0	0	0
PD22359a	486	221	0	0	1108	0	0	0	0	0	0	0	0	0	0	0	0	0	0	0	0	0	0	0	0	0	0	0	0	0
PD22360a	0	0	4564	0	0	0	0	2195	1010	0	0	0	739	0	0	0	0	0	0	0	0	0	0	0	0	0	0	0	0	0
PD22361a	977	1400	0	0	0	0	0	1419	0	0	0	0	2102	0	0	0	0	0	0	0	0	0	0	0	0	0	0	0	0	0
PD22362a	306	385	0	0	0	0	0	697	348	0	211	0	0	0	0	0	0	0	0	0	0	0	0	0	0	0	0	0	0	0
PD22363a	0	0	5193	0	0	556	0	2867	0	0	0	0	287	0	0	0	0	0	0	0	0	0	0	0	0	0	0	0	0	0
PD22364a	838	475	0	0	772	0	0	0	0	0	0	0	315	0	0	0	0	0	0	0	0	0	0	0	0	0	0	0	0	0
PD22365a	277	0	0	0	835	0	0	738	0	0	0	0	53	0	0	0	0	0	0	0	0	0	0	0	0	0	0	0	0	0
PD22366a	0	336	4009	0	2188	0	0	1702	0	0	0	0	1570	0	0	0	0	0	0	0	0	0	0	0	0	0	0	0	0	0
PD23550a	713	539	0	0	0	0	0	479	0	0	313	0	0	0	0	820	0	0	0	0	0	0	0	0	0	0	0	0	0	0
PD23554a	0	0	4080	0	0	0	0	2385	0	0	0	0	432	0	0	0	0	0	0	0	0	0	0	0	0	0	0	0	0	0
PD23558a	701	389	6274	0	0	0	0	2184	0	0	0	0	584	0	0	0	0	0	0	0	0	0	0	0	0	0	0	0	0	0
PD23559a	628	228	1197	0	1746	0	0	1174	0	0	0	0	406	0	0	0	0	0	0	0	0	0	0	0	0	0	0	0	0	0
PD23560a	460	234	0	0	1380	0	0	524	0	0	0	0	405	0	0	0	0	0	0	0	0	0	0	0	0	0	0	0	0	0
PD23562a	697	0	4609	0	1443	0	0	0	0	0	0	0	597	0	0	0	0	0	0	0	0	0	0	0	0	0	0	0	0	0
PD23563a	0	0	4084	0	0	0	0	3851	0	0	0	0	286	0	0	0	0	0	0	0	0	0	0	0	0	0	0	0	0	0
PD23565a	1510	2620	0	0	0	0	0	2270	0	0	0	0	2450	0	0	0	0	0	0	0	0	0	0	0	0	0	0	0	0	0
PD23566a	555	0	4246	0	0	0	0	1864	0	0	0	0	0	0	0	0	0	0	0	0	0	0	0	0	0	0	0	0	0	0
PD23567a	732	0	3867	0	0	0	0	2598	0	0	0	0	0	0	0	0	0	0	0	0	0	0	0	0	0	0	0	0	0	0
PD23569a	98	24	343	0	410	0	0	0	132	0	0	0	45	0	0	0	0	0	0	0	0	0	0	0	0	0	0	0	0	0
PD23570a	419	632	0	0	898	0	0	0	0	0	0	0	295	0	0	0	0	0	0	0	0	0	0	0	0	0	0	0	0	0
PD23574a	733	0	9925	0	0	0	0	0	0	0	0	0	2434	0	0	0	0	0	0	0	0	0	0	0	0	0	0	0	0	0
PD23577a	407	0	2234	0	1184	0	0	0	0	0	0	0	143	0	0	0	0	0	0	0	0	0	0	0	0	0	0	0	0	0
PD23578a	0	0	2719	0	0	0	0	2706	0	0	0	0	333	0	0	1080	0	0	0	0	0	0	0	0	0	0	0	0	0	0
PD24182a	0	0	3793	0	3546	0	0	0	0	0	0	0	2197	0	0	0	0	0	0	0	0	0	0	0	0	0	0	0	0	0
PD24186a	323	0	3580	0	0	0	0	1264	0	0	0	0	262	0	0	2057	0	0	0	0	0	0	0	0	0	0	0	0	0	0
PD24190a	0	0	0	0	3878	0	0	3298	0	0	0	0	675	0	0	0	1955	0	0	0	0	0	0	0	0	0	0	0	0	0
PD24191a	495	0	4747	0	0	0	0	0	0	0	0	0	0	0	0	877	0	0	0	0	0	0	0	0	0	0	0	0	0	0
PD24192a	0	0	12179	0	0	0	0	0	0	0	0	0	1913	0	0	3733	0	0	0	0	0	0	0	0	0	0	0	0	0	0
PD24194a	0	5323	2999	0	0	0	0	0	0	0	0	0	5371	0	0	0	0	0	0	0	0	0	0	0	0	0	0	0	0	0
PD24195a	469	99	0	0	1671	0	0	0	0	0	0	0	0	0	0	0	0	0	0	0	0	0	0	0	0	0	0	0	0	0
PD24196a	339	108	0	0	1137	0	0	785	0	0	0	0	249	0	0	0	0	0	0	0	0	0	0	0	0	0	0	0	0	0
PD24197a	0	0	10574	0	0	0	0	9640	0	0	0	0	0	0	0	0	0	0	0	0	0	0	0	0	0	0	0	0	0	0
PD24199a	556	137	999	0	964	0	0	0	0	0	0	0	196	0	0	0	0	0	0	0	0	0	0	0	0	0	0	0	0	0
PD24200a	0	0	487	0	0	0	0	308	0	0	0	0	0	0	0	178	0	0	0	0	0	0	0	0	0	0	0	0	0	0
PD24201a	1664	522	6545	0	0	0	0	8626	2108	0	0	0	1011	0	0	0	0	0	0	0	0	0	0	0	0	0	0	0	0	0
PD24202a	819	0	4485	0	0	0	0	1595	0	0	0	0	877	0	0	0	0	0	0	0	0	0	0	0	0	0	0	0	0	0
PD24204a	1447	0	0	0	1037	0	0	0	0	0	0	0	0	0	0	0	0	309	0	0	0	0	0	0	0	0	0	0	0	0
PD24205a	0	0	3068	0	1817	0	0	2687	0	0	0	0	434	0	0	0	0	0	0	0	0	0	0	0	0	0	0	0	0	920
PD24206a	432	293	0	0	1500	0	0	1169	0	0	0	0	213	0	0	0	0	0	0	0	0	0	0	0	0	0	0	0	0	0
PD24207a	1221	1142	0	0	0	0	0	0	0	0	0	0	1011	0	0	1369	0	0	0	0	0	0	0	0	0	0	0	0	0	0
PD24208a	0	15715	0	0	0	0	0	0	0	0	0	0	9908	0	0	0	0	0	0	0	0	0	0	0	0	0	0	0	0	0
PD24209a	0	1945	0	0	3383	0	0	0	0	0	0	0	4839	0	0	0	0	0	0	0	0	0	0	0	0	0	0	0	0	0
PD24212a	0	294	3442	0	0	0	0	4401	0	0	0	0	458	0	0	0	0	0	0	0	0	0	0	0	0	0	0	0	0	1457
PD24214a	1273	0	0	0	1361	0	0	0	0	0	0	0	0	0	0	0	0	444	0	0	0	0	0	0	0	0	0	0	0	0
PD24215a	0	155	1835	0	0	0	0	1883	1765	0	0	0	536	0	0	0	0	0	0	0	0	0	0	0	0	0	0	0	0	0
PD24216a	0	2764	0	0	0	0	0	0	0	0	0	0	2583	0	0	3991	0	0	0	0	0	0	0	0	0	0	0	0	0	0
PD24217a	0	4123	0	0	0	0	0	0	0	0	0	0	11181	0	0	0	0	0	0	0	0	0	0	0	0	0	0	0	0	0
PD24218a	462	171	0	0	2654	0	0	0	0	0	0	0	0	0	0	0	0	0	0	0	0	0	0	0	0	0	0	0	0	0
PD24219a	1751	0	0	0	0	0	0	718	0	0	0	0	0	0	0	848	0	0	0	0	0	0	0	0	0	0	0	0	0	0
PD24220a	1159	225	0	0	0	0	0	1473	0	0	0	0	752	0	0	0	0	0	0	0	0	0	0	0	0	0	0	0	0	0
PD24221a	184	0	568	0	0	0	0	547	411	0	0	0	110	0	0	470	0	0	0	0	0	0	0	0	0	0	0	0	0	0
PD24223a	891	943	0	0	1593	0	0	0	0	0	0	0	0	0	0	0	0	0	0	0	0	0	0	0	0	0	0	0	0	0
PD24224a	483	124	0	0	960	0	0	516	0	0	0	0	126	0	0	0	0	0	0	0	0	0	0	0	0	0	0	0	0	0
PD24225a	313	357	0	0	0	0	0	566	0	0	0	0	210	0	0	372	0	0	0	0	0	0	0	0	0	0	0	0	0	0
PD24302a	396	86	0	0	785	0	0	0	0	0	0	0	0	0	0	0	0	0	0	0	0	0	0	0	0	0	0	0	0	0
PD24303a	254	0	3590	0	0	0	0	0	0	0	0	0	655	0	0	0	0	0	0	0	0	0	0	0	0	0	0	0	0	0
PD24304a	0	0	3236	0	0	0	0	3616	0	0	0	0	0	0	0	0	0	0	0	0	0	0	0	0	0	0	0	0	0	0
PD24306a	137	0	1685	0	0	0	0	1327	0	0	0	0	185	0	0	0	0	0	0	0	0	0	0	0	0	0	0	0	0	0
PD24307a	369	89	0	0	770	0	0	363	0	0	0	0	0	0	0	0	0	0	0	0	0	0	0	0	0	0	0	0	0	0
PD24308a	847	0	1978	0	0	0	0	0	0	0	0	0	336	0	0	1588	0	0	0	0	0	0	0	0	0	0	0	0	0	0
PD24314a	796	0	0	0	1847	0	0	789	0	0	0	0	217	0	0	0	0	217	0	0	0	0	0	0	0	0	0	0	0	0
PD24318a	669	0	0	0	1799	0	0	0	0	0	0	0	76	0	0	0	0	0	0	0	0	0	0	0	0	0	0	0	0	0
PD24322a	933	591	0	0	2439	0	0	0	0	0	0	0	903	0	0	0	0	0	0	0	0	0	0	0	0	0	0	0	0	0
PD24325a	1282	0	4497	0	3246	0	0	0	0	0	0	0	1360	0	0	0	0	0	0	0	0	0	0	0	0	0	0	0	0	0
PD24326a	0	11560	0	0	0	0	0	0	0	0	0	0	12059	0	0	0	0	0	0	0	0	0	0	0	0	0	0	0	0	0
PD24327a	0	5955	0	0	0	0	0	0	3201	0	0	0	7028	0	0	0	0	0	0	0	0	0	0	0	0	0	0	0	0	0
PD24329a	985	186	0	0	0	0	0	669	0	0	0	0	0	0	0	269	0	0	0	0	0	0	0	0	0	0	0	0	0	0
PD24332a	783	177	0	0	0	0	0	609	349	0	0	0	0	0	0	0	0	0	0	0	0	0	0	0	0	0	0	0	0	0
PD24333a	0	0	0	0	0	0	0	0	0	0	0	0	0	0	0	0	22884	0	0	0	0	0	0	0	0	0	0	0	0	0
PD24335a	1523	188	0	0	0	0	0	1185	0	0	0	0	278	0	0	772	0	0	0	0	0	0	0	0	0	0	0	0	0	0
PD24336a	0	315	0	0	2020	0	0	795	0	0	0	0	207	0	0	0	0	0	0	0	0	0	0	0	0	0	0	0	0	0
PD24337a	478	0	3713	0	0	0	0	1218	0	0	0	0	296	0	0	0	0	0	0	0	0	0	0	0	0	0	0	0	0	0
PD3851a	416	81	0	0	0	0	0	828	0	0	0	0	0	0	0	306	0	0	0	0	0	0	0	0	0	0	0	0	0	185
PD3890a	558	113	4133	0	0	0	0	0	0	0	0	0	777	0	0	0	0	0	0	0	0	0	0	0	0	0	0	0	0	0
PD3904a	0	302	1597	0	1246	0	0	1676	0	0	344	0	501	0	0	0	0	0	0	0	0	0	0	0	0	0	0	0	0	0
PD3905a	288	176	2682	0	0	0	0	920	0	0	0	0	534	0	0	0	0	0	0	0	0	0	0	0	0	0	0	0	0	0
PD3945a	0	0	3439	0	3262	0	0	3178	0	0	0	0	669	0	0	0	0	0	0	0	0	0	0	0	0	0	0	0	0	0
PD3989a	705	293	0	0	762	0	0	477	0	0	0	0	0	0	0	0	0	0	0	0	0	0	0	0	0	0	0	0	0	0
PD4005a	392	685	3413	0	0	0	0	0	0	0	0	0	1549	0	0	0	0	0	0	0	0	0	0	0	0	0	0	0	0	0
PD4006a	660	0	6551	0	0	0	0	2363	0	0	0	0	0	0	0	0	0	0	0	0	0	0	0	0	0	0	0	0	0	0
PD4069a	879	94	0	0	812	0	0	0	0	0	0	0	0	0	0	0	0	298	0	0	0	0	0	0	0	0	0	0	0	0
PD4072a	0	13741	0	0	0	0	0	0	0	0	0	0	14189	0	0	0	0	0	0	0	0	0	0	0	0	0	0	0	0	0
PD4076a	740	246	0	0	1103	0	0	0	0	0	0	0	0	0	0	0	0	0	0	0	0	0	0	0	0	0	0	0	0	0
PD4085a	612	159	0	0	1073	0	0	858	0	0	0	0	0	0	0	0	0	0	0	0	0	0	0	0	0	0	0	0	0	0
PD4086a	303	203	1030	0	0	0	0	0	0	0	0	0	413	0	0	0	0	0	0	0	0	0	0	0	0	0	0	0	0	0
PD4088a	581	88	635	0	0	0	0	0	0	0	0	0	101	0	0	0	0	284	0	0	0	0	0	0	0	0	0	0	0	0
PD4103a	1182	625	0	0	0	0	0	1330	1165	0	337	0	576	0	0	0	0	0	0	0	0	0	0	0	0	0	0	0	0	0
PD4107a	0	894	3710	0	2321	0	0	2948	0	0	0	0	0	0	0	0	0	0	0	0	0	0	0	0	0	0	0	0	0	0
PD4109a	1716	445	0	0	4600	0	0	1772	0	0	0	0	1779	0	0	0	0	0	0	0	0	0	0	0	0	0	0	0	0	0
PD4115a	453	0	3630	0	2639	0	0	2645	0	0	0	0	383	0	0	0	0	0	0	0	0	0	0	0	0	0	0	0	0	0
PD4116a	0	286	4328	0	0	0	0	2383	0	0	0	0	815	0	0	0	0	0	356	0	0	0	0	0	0	0	0	0	0	0
PD4192a	613	194	2181	0	0	0	0	0	747	0	0	0	554	0	0	0	0	0	0	0	0	0	0	0	0	0	0	0	0	0
PD4194a	428	113	0	0	687	0	0	0	0	0	0	0	199	0	0	0	0	0	0	0	0	0	0	0	0	0	0	0	0	0
PD4198a	1040	571	0	0	1414	0	0	1217	0	0	0	0	272	0	0	0	0	0	0	0	0	0	0	0	0	0	0	0	0	0
PD4199a	0	2774	1662	0	0	0	0	0	0	0	0	0	2510	0	0	0	0	0	0	0	0	0	0	0	0	0	0	0	0	0
PD4225a	958	141	0	0	855	0	0	0	0	0	0	0	0	0	0	0	0	0	0	0	0	0	0	0	0	0	0	0	0	0
PD4248a	320	97	0	0	1047	0	0	593	0	0	0	0	136	0	0	0	0	0	0	0	0	0	0	0	0	0	0	0	0	0
PD4252a	944	0	0	0	2297	0	0	0	0	0	0	0	162	0	0	0	0	368	0	0	0	0	0	0	0	0	0	0	0	0
PD4255a	775	0	0	0	2687	0	0	0	0	0	0	0	215	0	0	0	0	875	0	0	0	0	0	0	0	0	0	0	0	0
PD4261a	491	0	0	0	1246	0	0	0	0	0	0	0	57	0	0	0	0	0	0	0	0	0	0	0	0	0	0	0	0	0
PD4264a	944	255	0	0	917	0	0	0	0	0	0	0	0	0	0	0	0	0	0	0	0	0	0	0	0	0	0	0	0	0
PD4266a	477	816	0	0	0	0	0	0	0	0	0	0	370	0	0	723	0	0	0	0	0	0	0	0	0	0	0	0	0	0
PD4267a	683	126	0	0	836	0	0	0	0	0	0	0	472	0	0	0	0	0	0	0	0	0	0	0	0	0	0	0	0	0
PD4315a	717	456	0	0	0	0	143	1578	0	0	0	0	490	0	0	0	0	0	0	0	0	0	0	0	0	0	0	0	0	0
PD4604a	514	0	4885	0	0	0	0	2655	0	0	608	0	658	0	0	0	0	0	0	0	0	0	0	0	0	0	0	0	0	0
PD4605a	1077	0	0	0	0	0	0	577	0	0	175	0	231	0	0	587	0	0	0	0	0	0	0	0	0	0	0	0	0	0
PD4606a	415	0	285	0	0	0	0	0	0	0	84	0	0	0	0	344	0	0	0	0	0	0	0	0	0	0	0	0	0	0
PD4607a	0	16351	0	0	0	0	0	0	0	0	0	0	9601	0	0	0	0	0	0	0	0	0	0	0	0	0	0	0	0	0
PD4613a	396	635	0	0	639	0	0	0	0	0	0	0	523	0	0	0	0	0	0	0	0	0	0	0	0	0	0	0	0	0
PD4826a	645	577	0	0	1989	0	0	0	0	0	0	0	605	0	0	0	0	0	0	0	0	0	0	0	0	0	0	0	0	0
PD4833a	675	0	4249	0	0	0	0	985	0	0	0	0	489	0	0	0	0	0	0	0	0	0	0	0	0	0	0	0	0	0
PD4836a	674	98	1127	0	2107	0	0	0	0	0	0	0	294	0	0	0	0	0	0	0	0	0	0	0	0	0	0	0	0	0
PD4841a	578	0	2269	0	2206	0	0	1669	0	0	0	0	296	0	0	0	0	0	0	0	0	0	0	0	0	0	0	0	0	0
PD4844a	604	0	8118	0	3125	0	0	0	0	0	0	0	961	0	0	0	0	0	0	0	0	0	0	0	0	0	0	0	0	0
PD4845a	623	0	2219	0	0	0	0	1502	789	0	0	0	0	0	0	0	600	0	0	0	0	0	0	0	0	0	0	0	0	0
PD4847a	1134	364	0	0	4565	0	0	3066	1911	0	0	0	0	0	0	0	0	0	0	0	0	0	0	0	0	0	0	0	0	0
PD4872a	0	479	0	0	0	0	0	3509	0	0	0	0	820	0	0	0	0	0	0	0	0	0	0	0	0	0	0	0	0	0
PD4874a	0	740	0	0	4119	0	0	2560	0	0	0	0	2288	0	0	0	0	0	0	0	0	0	0	0	0	0	0	0	0	0
PD4875a	716	0	2192	0	2062	0	0	1546	0	0	0	0	287	0	0	0	0	0	0	0	0	0	0	0	0	0	0	0	0	0
PD4876a	0	206	3132	0	1111	0	0	0	0	0	0	0	457	0	0	0	0	0	0	0	0	0	0	0	0	0	0	0	0	0
PD4951a	245	0	861	0	626	0	0	649	0	0	153	0	242	0	0	0	0	0	0	0	0	0	0	0	0	0	0	0	0	0
PD4952a	1088	515	3693	0	2666	0	0	3137	0	0	0	0	932	0	0	0	0	0	0	0	0	0	0	0	0	0	0	0	0	0
PD4953a	0	0	2915	0	1833	0	204	1614	0	0	0	0	377	0	0	0	0	0	0	0	0	0	0	0	0	0	0	0	0	0
PD4954a	542	0	3444	0	0	0	0	871	0	0	0	0	464	0	0	0	0	0	0	0	0	0	0	0	0	0	0	0	0	441
PD4955a	323	212	2185	0	0	0	0	2566	0	0	0	0	356	0	0	0	0	0	0	0	0	0	0	0	0	0	0	0	0	426
PD4956a	720	0	9339	0	0	0	0	0	0	0	0	0	1521	0	0	0	0	0	0	0	0	0	0	0	0	0	0	0	0	0
PD4957a	354	180	1112	0	0	0	0	799	0	0	0	0	259	0	0	572	0	0	0	0	0	0	0	0	0	0	0	0	0	0
PD4958a	0	529	1888	0	2929	0	0	3248	0	0	0	0	742	0	0	0	0	0	0	0	0	0	0	0	0	0	0	0	0	0
PD4959a	565	0	2114	0	0	0	0	1428	0	0	0	0	124	0	0	0	0	0	0	0	0	0	0	0	0	0	0	0	0	377
PD4962a	0	1528	0	0	0	0	0	2792	0	0	0	0	2522	0	0	0	0	0	0	0	0	0	0	0	0	0	0	0	0	0
PD4965a	838	139	0	0	1196	0	0	531	0	0	0	0	0	0	0	0	0	0	0	0	0	0	0	0	0	0	0	0	0	0
PD4967a	504	548	0	0	1326	0	0	0	0	0	0	0	847	0	0	0	0	0	0	0	0	0	0	0	0	0	0	0	0	0
PD4968a	1361	1080	0	0	0	0	0	1266	0	0	0	0	0	0	0	1071	0	0	0	0	0	0	0	0	0	0	0	0	0	0
PD4969a	288	39	0	0	526	0	0	176	0	0	0	0	0	0	0	0	0	0	0	0	0	0	0	0	0	0	0	0	0	0
PD4970a	774	89	0	0	1409	0	0	0	0	0	0	0	135	0	0	0	0	0	0	0	0	0	0	0	0	0	0	0	0	0
PD4971a	999	106	0	0	0	0	0	1109	0	0	0	0	121	0	0	427	0	0	0	0	0	0	0	0	0	0	0	0	0	0
PD4972a	334	0	0	0	509	0	56	243	0	0	0	0	0	0	0	0	0	0	0	0	0	0	0	0	0	0	0	0	0	0
PD4975a	703	0	5030	0	1449	0	0	0	0	0	0	0	322	0	0	0	0	0	0	0	0	0	0	0	0	0	0	0	0	0
PD4976a	1832	0	0	0	0	0	227	2141	0	0	0	0	464	0	392	1216	0	0	0	0	0	0	0	0	0	0	0	0	0	0
PD4977a	0	24238	0	0	0	0	0	0	0	0	0	0	18019	0	0	0	0	0	0	0	0	0	0	0	0	0	0	0	0	0
PD4978a	658	563	0	0	0	0	0	1065	0	0	0	0	641	0	0	806	0	0	0	0	0	0	0	0	0	0	0	0	0	0
PD4980a	696	0	0	0	1417	0	0	958	0	0	0	0	228	0	0	0	0	496	0	0	0	0	0	0	0	0	0	0	0	0
PD4981a	648	0	0	0	388	0	0	431	0	0	0	0	0	0	0	0	0	0	0	0	0	0	0	0	0	0	0	0	0	195
PD4982a	602	0	0	0	0	0	0	263	0	0	96	0	0	0	0	511	0	0	0	0	0	0	0	0	0	0	0	0	0	0
PD4983a	452	36	0	0	1273	0	0	0	0	0	0	0	0	0	0	0	0	0	0	0	0	0	0	0	0	0	0	0	0	0
PD4985a	562	99	0	0	1341	0	0	0	0	0	0	0	0	0	0	0	0	0	0	0	0	0	0	0	0	0	0	0	0	0
PD4986a	414	41	484	0	1035	0	0	0	0	0	0	0	0	0	0	0	0	0	0	0	0	0	0	0	0	0	0	0	0	0
PD5925a	0	247	3469	0	3833	0	0	0	0	0	0	0	1228	0	0	0	0	0	0	0	0	0	0	0	0	0	0	0	0	0
PD5928a	797	221	3821	0	0	0	0	2273	0	0	0	0	0	0	0	0	0	0	0	0	0	0	0	0	0	0	0	0	0	0
PD5930a	380	0	3088	0	0	0	0	0	0	0	0	0	477	0	0	0	0	0	0	0	0	0	0	0	0	0	0	0	0	0
PD5932a	0	0	5804	0	2553	0	0	0	0	0	0	0	1702	0	0	0	0	0	0	0	0	0	0	0	0	0	0	0	0	0
PD5934a	843	0	7490	0	0	0	0	3245	0	0	0	0	0	0	0	0	0	0	0	0	0	0	0	0	0	0	0	0	0	0
PD5935a	986	0	7463	0	0	0	0	0	0	0	0	0	1220	0	0	0	0	0	0	0	0	0	0	0	0	0	0	0	0	0
PD5936a	805	222	0	0	1233	0	0	521	0	0	0	0	0	0	0	0	0	0	0	0	0	0	0	0	0	0	0	0	0	0
PD5942a	1190	236	2305	0	1859	0	0	0	0	0	0	0	398	0	0	0	0	0	0	0	0	0	0	0	0	0	0	0	0	0
PD5944a	711	170	0	0	1188	0	0	538	0	0	0	0	0	0	0	0	0	0	0	0	0	0	0	0	0	0	0	0	0	0
PD5945a	294	0	5701	0	0	0	0	2380	0	0	0	0	456	0	0	0	0	0	0	0	0	0	0	0	0	0	0	0	0	0
PD5946a	1231	132	0	0	2034	0	0	0	0	0	0	0	169	0	0	0	0	343	0	0	0	0	0	0	0	0	0	0	0	0
PD5947a	484	156	0	0	539	0	0	387	0	0	0	0	211	0	0	0	0	0	0	0	0	0	0	0	0	0	0	0	0	0
PD5948a	0	0	10677	0	0	0	0	0	2488	0	0	0	0	0	0	0	0	0	0	0	0	0	0	0	0	2006	0	0	0	0
PD5950a	950	0	0	0	1054	0	0	0	0	0	0	0	0	0	0	0	0	185	0	0	0	0	0	0	0	0	0	0	0	0
PD5951a	1526	282	0	0	1383	0	0	0	0	0	0	0	0	0	0	0	0	0	0	0	0	0	0	0	0	0	0	0	0	0
PD5953a	837	0	744	0	0	0	0	0	0	0	0	0	0	0	0	554	0	0	0	0	0	0	0	0	0	0	0	0	0	0
PD5956a	771	132	0	0	0	0	0	2457	0	0	0	0	0	0	0	0	0	267	0	0	0	0	0	0	0	0	0	0	0	455
PD5959a	619	217	747	0	0	0	145	0	0	0	0	0	0	0	0	774	0	0	0	0	0	0	0	0	0	0	0	0	0	0
PD5960a	416	0	925	0	1126	0	201	1034	0	0	0	0	199	0	140	0	0	0	0	0	0	0	0	0	0	0	0	0	0	0
PD5961a	690	227	0	0	0	0	249	982	0	0	0	0	0	0	163	0	0	0	0	0	0	0	0	0	0	0	0	0	0	0
PD5964a	303	55	272	0	0	0	56	565	270	0	0	0	66	0	0	0	0	0	0	0	0	0	0	0	0	0	0	0	0	0
PD6016a2	556	396	751	0	0	0	0	0	0	0	0	0	206	0	0	0	0	0	0	0	0	0	0	0	0	0	0	0	0	0
PD6041a	524	81	0	0	1164	0	0	0	0	0	0	0	0	0	0	0	0	0	0	0	0	0	0	0	0	0	0	0	0	0
PD6042a	0	553	0	0	3767	0	0	1703	0	0	0	0	1095	0	0	0	0	0	0	0	0	0	0	0	0	0	0	0	0	0
PD6043a	0	6640	0	0	0	0	0	8802	0	0	0	0	7321	0	0	0	0	0	0	0	0	0	0	0	0	0	0	0	0	0
PD6044a	689	0	0	0	1745	0	0	0	0	0	0	0	138	0	0	0	0	0	0	0	0	0	0	0	0	0	0	0	0	0
PD6045a	366	539	0	0	1228	0	0	0	0	0	0	0	198	0	0	0	0	0	0	0	0	0	0	0	0	0	0	0	0	0
PD6046a	772	106	0	0	818	0	129	1044	0	0	0	0	104	0	0	0	0	0	0	0	0	0	0	0	0	0	0	0	0	0
PD6047a	2126	356	0	0	5690	0	0	0	0	0	0	0	385	0	0	0	0	882	0	0	0	0	0	0	0	0	0	0	0	0
PD6048a	995	107	0	0	0	0	0	1542	0	0	256	0	199	0	0	0	0	0	0	0	0	0	0	0	0	0	0	0	0	0
PD6404a	774	292	3068	0	1911	0	0	0	0	0	0	0	505	0	0	0	0	0	0	0	0	0	0	0	0	0	0	0	0	0
PD6405a	0	6186	0	0	0	0	0	0	0	0	0	0	29130	0	0	0	0	0	0	0	0	0	0	0	0	0	0	0	0	0
PD6406a	361	0	3839	0	0	0	0	0	483	0	0	0	341	0	0	0	0	0	0	0	0	0	0	0	0	0	0	0	0	0
PD6409a	0	0	4645	0	0	0	0	3077	0	0	0	0	1086	0	0	0	0	0	0	0	0	0	0	0	0	0	0	0	0	0
PD6410a	617	0	5898	0	0	0	0	0	0	0	0	0	797	0	0	0	0	0	0	0	0	0	0	0	0	0	0	0	0	0
PD6411a	384	0	4553	0	0	0	0	1014	0	0	0	0	722	0	0	0	0	0	0	0	0	0	0	0	0	0	0	0	0	0
PD6413a	300	239	2310	0	0	0	0	1100	0	0	0	0	635	0	0	0	0	0	0	0	0	0	0	0	0	0	0	0	0	0
PD6414a	387	157	0	0	989	0	0	0	226	0	0	0	0	0	0	0	0	0	0	0	0	0	0	0	0	0	0	0	0	0
PD6415a	0	516	3307	0	4136	0	0	0	0	0	0	0	1584	0	0	0	0	0	0	0	0	0	0	0	0	0	0	0	0	0
PD6416a	0	103	1419	0	0	0	0	1151	0	0	0	0	438	0	0	0	218	0	0	0	0	0	0	0	0	0	0	0	0	0
PD6417a	794	0	322	0	0	0	0	0	0	0	0	0	0	0	0	428	0	0	0	0	0	0	0	0	0	0	0	0	0	0
PD6418a	612	52	0	0	1198	0	0	0	0	0	156	0	0	0	0	0	0	0	0	0	0	0	0	0	0	0	0	0	0	0
PD6422a	781	316	0	0	2054	0	0	1526	0	0	287	0	214	0	0	0	0	0	0	0	0	0	0	0	0	0	0	0	0	0
PD6466b	624	143	0	0	0	0	0	454	0	0	0	585	0	0	0	0	0	0	0	0	0	0	0	0	0	0	0	0	0	0
PD6684a	1003	0	9926	0	0	0	0	0	0	0	0	0	2746	0	0	0	0	0	0	0	0	0	0	0	0	0	0	0	0	0
PD6711a2	669	109	0	0	0	0	0	0	0	0	0	0	0	0	0	896	0	0	0	0	0	0	0	0	0	0	0	0	0	238
PD6719a	705	0	3134	0	0	0	0	1130	0	0	0	0	0	0	0	0	0	0	0	0	0	0	0	0	0	0	0	0	0	0
PD6720a	585	72	0	0	1268	0	0	0	0	0	0	0	91	0	0	0	0	0	0	0	0	0	0	0	0	0	0	0	0	0
PD6721a	817	208	0	0	704	0	0	501	0	0	0	0	0	0	0	0	0	0	0	0	0	0	0	0	0	0	0	0	0	0
PD6722a	0	2143	3126	0	0	0	0	0	0	0	0	0	4839	0	0	0	0	0	0	0	0	0	0	0	0	0	0	0	0	0
PD6727b	1703	278	3599	0	0	0	0	0	0	0	0	0	1097	0	0	0	0	0	0	0	0	0	0	0	0	0	0	0	0	0
PD6728b	445	69	796	0	459	0	0	657	0	0	0	0	149	0	0	0	0	0	0	0	0	0	0	0	0	0	0	0	0	0
PD6729a2	1105	0	2199	0	1404	0	0	0	0	0	0	0	162	0	0	0	0	0	0	0	0	0	0	0	0	0	0	0	0	0
PD6730b	682	0	7087	0	0	0	0	1882	0	0	0	0	437	0	0	0	0	0	0	0	0	0	0	0	0	0	0	0	0	0
PD6731a2	0	1082	4621	0	0	0	0	0	0	0	0	0	2844	0	0	0	0	0	0	0	0	0	0	0	0	0	0	0	0	0
PD6732b	565	0	886	0	0	0	176	0	0	0	0	0	468	0	0	818	0	0	0	0	0	0	0	0	0	0	0	0	0	0
PD6733b	1083	475	0	0	2429	0	0	0	0	0	0	0	688	0	0	0	0	0	0	0	0	0	0	0	0	0	0	0	0	0
PD7066a	649	0	2693	0	0	0	0	0	0	0	0	0	295	0	0	0	0	0	0	0	0	0	0	0	0	0	0	0	0	0
PD7067a	728	0	0	0	2783	0	0	1082	822	0	0	0	563	0	0	0	0	0	0	0	0	0	0	0	0	0	0	0	0	0
PD7069a	843	998	0	0	1923	0	0	0	0	0	0	0	1365	0	0	0	0	0	0	0	0	0	0	0	0	0	0	0	0	0
PD7199a	464	0	0	0	440	0	0	225	0	0	0	0	0	0	0	0	0	0	0	0	0	0	0	0	0	0	0	0	0	0
PD7201a	547	101	0	0	935	0	0	0	0	0	0	0	0	0	0	0	0	0	0	0	0	0	0	0	0	0	0	0	0	0
PD7202a	1614	321	0	0	1963	0	0	0	0	0	0	0	327	0	0	0	0	914	0	0	0	0	0	0	0	0	0	0	0	0
PD7203a	215	183	0	0	662	0	0	0	0	0	0	0	317	0	0	0	0	184	0	0	0	0	0	0	0	0	0	0	0	0
PD7204a	744	0	0	0	1431	0	0	0	0	0	0	0	0	0	0	0	0	0	0	0	0	0	0	0	0	0	0	0	0	0
PD7205a	1017	1011	0	0	3662	0	0	0	0	0	0	0	2166	0	0	0	0	0	0	0	0	0	0	0	0	0	0	0	0	0
PD7206a	877	0	0	0	2231	0	0	1364	0	0	0	0	266	0	0	0	0	0	0	0	0	0	0	0	0	0	0	0	0	0
PD7207a	1049	278	0	0	1216	0	308	0	0	0	0	0	0	0	0	0	0	0	0	0	0	0	0	0	0	0	0	0	0	0
PD7209a	686	84	0	0	0	0	0	0	0	0	0	0	0	0	0	530	0	153	0	0	0	0	0	0	0	0	0	0	0	209
PD7210a	502	0	0	0	521	0	0	295	0	0	0	0	0	0	0	0	0	0	0	0	0	0	0	0	0	0	0	0	0	0
PD7211a	810	0	5083	0	0	0	0	1991	0	0	0	0	400	0	0	0	0	0	0	0	0	0	0	0	0	0	0	0	0	0
PD7214a	374	82	420	0	0	0	0	0	0	0	135	0	0	0	0	480	0	0	0	0	0	0	0	0	0	0	0	0	0	0
PD7215a	557	910	3722	0	0	0	0	0	0	0	0	0	1193	0	0	0	0	0	0	0	0	0	0	0	0	0	0	0	0	0
PD7217a	631	642	4192	0	2399	0	0	0	0	0	0	0	1302	0	0	0	0	0	0	0	0	0	0	0	0	0	0	0	0	0
PD7218a	556	46	0	0	548	0	0	0	0	0	0	0	0	0	0	0	0	0	0	0	0	0	0	0	0	0	0	0	322	0
PD7219a	0	4061	0	0	0	0	0	0	0	0	0	0	7559	0	0	0	0	0	0	0	0	0	0	0	0	0	0	0	0	0
PD7220a	931	391	0	0	1161	0	0	0	0	0	0	0	223	0	0	0	0	0	0	0	0	0	0	0	0	0	0	0	0	0
PD7221a	799	358	0	0	0	0	0	0	0	0	0	0	205	0	0	677	0	0	0	0	0	0	0	0	0	0	0	0	0	0
PD7238a	762	340	0	0	1113	0	0	0	0	0	0	0	0	0	0	0	0	0	0	0	0	0	0	0	0	0	0	0	0	0
PD7240a	1344	0	1502	0	2078	0	0	0	0	0	0	0	262	0	0	0	0	0	0	0	0	0	0	0	0	0	0	0	0	0
PD7243a	1116	473	0	0	2810	0	0	1341	0	0	0	0	279	0	0	0	0	753	0	0	0	0	0	0	0	0	0	0	0	0
PD7248a	922	0	8440	0	0	0	0	0	0	0	0	0	1468	0	0	2210	0	0	0	0	0	0	0	0	0	0	0	0	0	0
PD7249a	594	854	0	0	2245	0	0	0	0	0	0	0	889	0	0	0	0	0	0	0	0	0	0	0	0	0	0	0	0	0
PD7250a	682	0	6946	0	0	0	0	0	0	0	0	0	260	0	0	0	0	0	0	0	0	0	0	0	0	0	0	0	0	0
PD7304a	546	237	511	0	0	0	0	462	244	0	0	0	0	0	0	0	0	0	0	0	0	0	0	0	0	0	0	0	0	0
PD7305a	1489	276	0	0	0	0	258	1607	0	0	0	0	494	0	0	0	0	629	0	0	0	0	0	0	0	0	0	0	0	0
PD7306a	1430	547	0	0	0	0	456	2222	1656	0	0	0	549	0	0	0	0	0	0	0	0	0	0	0	0	0	0	0	0	0
PD7307a	0	2338	0	0	2445	0	0	0	0	0	0	0	3639	0	0	0	0	0	0	0	0	0	0	0	0	0	0	0	0	0
PD7316a	405	0	3707	0	0	0	0	1109	0	0	0	0	425	0	0	0	0	0	0	0	0	0	0	0	0	0	0	0	0	0
PD7321a	624	0	4426	0	0	0	0	0	0	0	0	0	1004	0	0	0	0	0	0	0	0	0	0	0	0	0	0	0	0	0
PD7322a	673	0	0	0	982	0	0	0	0	0	0	0	0	0	0	0	0	359	0	0	0	0	0	0	0	0	0	0	0	0
PD7341a	708	221	871	0	0	0	0	822	0	0	0	0	466	0	0	0	0	0	0	0	0	0	0	0	0	0	0	0	0	0
PD7344a	186	0	260	0	0	0	0	0	0	39	0	0	50	0	0	185	0	0	0	0	0	0	0	0	0	0	0	0	0	0
PD7426a	0	0	12756	0	0	0	0	0	0	0	0	0	5740	0	0	0	0	0	0	0	0	0	0	0	0	0	0	0	0	0
PD7428a	0	0	10135	0	0	0	0	4480	0	0	0	0	1333	0	0	0	0	0	0	0	0	0	0	0	0	0	0	0	0	0
PD8609a	0	2267	0	0	1732	0	0	0	0	0	0	0	1087	0	0	0	0	0	0	0	0	0	0	0	0	0	0	0	0	0
PD8610a	0	173	1493	0	1456	0	0	1450	0	0	0	0	524	0	0	0	0	0	0	0	0	0	0	0	0	0	0	0	0	0
PD8611a	0	0	3598	0	2254	0	0	0	0	0	0	0	974	0	0	0	0	0	0	0	0	0	0	0	0	0	0	0	0	0
PD8612a	758	286	0	0	405	0	0	517	0	0	0	0	0	0	0	0	0	0	0	0	0	0	0	0	0	0	0	0	0	0
PD8614a	339	72	0	0	803	0	0	224	0	0	0	0	0	0	0	0	0	0	0	0	0	0	0	0	0	0	0	0	0	0
PD8615a	706	506	1621	0	0	0	0	0	0	0	0	0	1435	0	0	0	0	0	0	0	0	0	0	0	0	0	0	0	0	0
PD8617a	439	107	0	0	1351	0	0	0	0	0	0	0	0	0	0	0	0	0	0	0	0	0	0	0	0	0	0	0	0	0
PD8618a	486	60	0	0	959	0	0	0	0	0	0	0	0	0	0	0	0	0	0	0	0	0	0	0	0	0	0	0	0	0
PD8619a	871	102	1298	0	1034	0	0	0	0	0	0	0	264	0	0	0	0	0	0	0	0	0	0	0	0	0	0	0	0	0
PD8620a	0	644	0	0	1129	0	0	0	0	0	0	0	883	0	0	0	0	0	0	0	0	0	0	0	0	0	0	0	0	0
PD8621a	963	0	5291	0	0	0	0	1225	0	0	0	0	582	0	0	0	0	0	0	0	0	0	0	0	0	0	0	0	0	0
PD8622a	414	57	0	0	799	0	0	473	0	0	0	0	64	0	0	0	0	0	0	0	0	0	0	0	0	0	0	0	0	0
PD8623a	513	245	673	0	0	0	0	0	0	0	0	0	0	0	0	588	0	0	0	0	0	0	0	0	0	0	0	0	0	0
PD8652a2	1137	0	9573	0	3381	0	0	0	0	0	0	0	1764	0	0	0	0	0	0	0	0	0	0	0	0	0	0	0	0	0
PD8660a2	2521	1739	12888	0	0	0	0	0	5779	0	0	0	3199	0	0	0	0	0	0	0	0	0	0	0	0	0	0	0	0	0
PD8828a	566	360	0	0	809	0	0	0	0	0	0	0	323	0	0	0	0	0	0	0	0	0	0	0	0	0	0	0	0	0
PD8830a	1705	0	4982	0	0	0	0	1558	0	0	0	0	0	0	0	0	0	0	0	0	0	0	0	0	0	0	0	0	0	0
PD8832a	0	0	17571	0	0	1495	0	6339	0	0	0	0	1002	0	0	0	0	0	0	0	0	0	0	0	0	0	0	0	0	0
PD8964a	0	0	5129	0	2993	0	0	2170	0	0	0	0	857	0	0	0	0	0	0	0	0	0	0	0	0	0	0	0	0	0
PD8965a	514	456	0	0	1894	0	0	1139	0	0	0	0	445	0	0	0	0	0	0	0	0	0	0	0	0	0	0	0	0	0
PD8969a	568	298	3110	0	1822	0	0	0	0	0	0	0	1019	0	0	0	0	0	0	0	0	0	0	0	0	0	0	0	0	0
PD8973a	1100	1418	0	0	0	0	0	0	0	0	0	0	2352	0	0	1036	0	0	0	0	0	0	0	0	0	0	0	0	0	0
PD8977a	2111	200	0	0	0	0	0	845	0	0	0	0	0	0	0	887	0	0	0	0	0	0	0	0	0	0	0	0	0	0
PD8978a	923	0	4325	0	0	0	0	0	969	0	0	0	451	0	0	0	0	0	0	0	0	0	0	0	0	0	0	0	0	0
PD8979a	869	235	0	0	1353	0	0	0	924	0	0	0	209	0	0	0	0	0	0	0	0	0	0	0	0	0	0	0	0	445
PD8980a	0	719	4983	0	3232	0	0	5189	0	0	0	0	1333	0	0	0	0	0	0	0	0	0	0	0	0	0	0	0	0	0
PD8981a	525	101	0	0	0	0	0	831	0	0	157	0	130	0	0	0	0	0	0	0	0	0	0	0	0	0	0	0	0	0
PD8982a	1760	0	12760	0	0	0	0	0	0	0	0	0	7035	0	0	0	0	0	0	0	0	0	0	0	0	0	0	0	0	0
PD8984a	1030	0	6909	0	0	0	0	0	0	0	0	0	1211	0	0	0	0	0	0	0	0	0	0	0	0	0	0	0	0	0
PD8995a	2107	2206	0	0	0	0	0	1631	0	0	0	0	1639	0	0	0	0	0	0	0	0	0	0	0	0	0	0	0	0	0
PD8996a	1083	0	0	0	0	0	204	1251	0	0	0	345	112	0	233	0	0	0	0	0	0	0	0	0	0	0	0	0	0	0
PD8997a	963	116	0	0	1560	0	0	0	0	0	0	0	190	0	0	0	0	0	0	0	0	0	0	0	0	0	0	0	0	0
PD8998a	0	958	0	0	2024	0	0	0	0	0	0	0	1785	0	0	0	0	0	0	0	0	0	0	0	0	0	0	0	0	0
PD8999a	441	55	0	0	850	0	0	0	0	0	0	0	0	0	0	0	0	0	0	0	0	0	0	0	0	0	0	0	0	0
PD9000a	0	355	3390	0	2170	0	0	2770	0	0	0	0	822	0	0	0	0	0	0	0	0	0	0	0	0	0	0	0	0	0
PD9001a	707	92	0	0	1905	0	0	0	0	0	0	0	0	0	0	0	0	0	0	0	0	0	0	0	0	0	0	0	0	0
PD9002a	498	211	1358	0	0	0	0	1817	1347	0	0	0	301	854	0	2085	0	0	0	0	0	0	0	0	0	0	0	0	0	0
PD9004a	0	278	7739	0	0	0	0	0	0	0	0	0	1289	0	0	0	0	0	1317	0	0	0	0	0	0	0	0	0	0	0
PD9009a	0	2737	4520	0	0	0	0	0	0	0	0	0	7952	0	0	0	0	0	0	0	0	0	0	0	0	0	0	0	0	0
PD9063a	0	30800	0	0	0	0	0	0	0	0	0	0	19244	0	0	0	0	0	0	0	0	0	0	0	0	0	0	0	0	0
PD9064a	828	253	6596	0	0	0	0	3827	0	0	0	0	845	0	0	0	0	0	0	0	0	0	0	0	0	0	0	0	0	0
PD9065a	544	290	0	0	858	0	0	0	0	0	0	0	0	0	0	0	0	516	0	0	0	0	0	0	0	0	0	0	0	0
PD9067a	479	172	0	0	776	0	0	0	0	0	0	0	125	0	0	0	0	0	0	0	0	0	0	0	0	0	0	0	0	0
PD9193a	427	0	695	0	0	0	0	0	0	0	0	0	174	0	0	0	0	200	0	0	0	0	0	0	0	0	0	0	0	184
PD9464a	657	345	0	0	1778	0	0	1387	0	0	0	0	422	0	0	0	0	0	0	0	0	0	0	0	0	0	0	0	0	659
PD9467a	1081	182	0	0	0	0	0	997	0	0	201	0	0	0	0	0	0	0	0	0	0	0	0	0	0	0	0	0	0	0
PD9539a	2186	0	0	0	0	0	0	1220	0	0	0	0	173	0	0	0	0	0	0	0	0	0	0	0	0	0	0	0	0	0
PD9541a	1358	285	1061	0	0	0	0	0	0	0	0	0	0	0	0	0	0	0	0	0	0	0	0	0	0	0	0	0	0	0
PD9544a	437	92	0	0	858	0	0	0	0	0	0	0	0	0	0	0	0	0	0	0	0	0	0	0	0	0	0	0	0	0
PD9567a	934	207	0	0	1231	0	0	905	0	0	0	0	233	0	0	0	0	0	0	0	0	0	0	0	0	0	0	0	0	0
PD9568a	2147	800	16990	0	0	0	0	5990	0	0	0	0	4466	0	0	0	0	0	0	0	0	0	0	0	0	0	0	0	0	0
PD9569a	675	0	0	0	1382	0	0	0	0	0	0	0	82	0	0	0	0	0	0	0	0	0	0	0	0	0	0	0	0	0
PD9570a	544	292	0	0	0	0	0	332	0	0	0	0	0	0	0	237	0	0	0	0	0	0	0	0	0	0	0	0	0	0
PD9571a	665	0	1580	0	2234	0	0	0	0	0	0	0	220	0	0	0	0	0	0	0	0	0	0	0	0	0	0	0	0	0
PD9572a	715	0	1105	0	0	0	0	0	0	0	0	0	1055	0	0	1206	0	0	0	0	0	0	0	0	0	0	0	0	0	0
PD9573a	736	0	0	0	742	0	0	0	0	0	0	0	0	0	136	0	0	0	0	0	0	0	0	0	0	0	0	0	0	0
PD9574a	585	0	0	0	662	0	0	385	0	0	0	0	0	0	0	0	0	0	0	0	0	0	0	0	0	0	0	0	0	0
PD9575a	776	0	1518	0	0	0	0	0	1024	0	0	0	621	0	0	2558	0	0	0	0	0	0	0	0	0	0	0	0	0	0
PD9576a	805	0	12461	0	0	0	0	3969	0	0	0	0	601	0	0	0	0	0	0	0	0	0	0	0	0	0	0	0	0	0
PD9577a	452	42	0	0	708	0	0	420	0	0	0	0	0	0	0	0	0	0	0	0	0	0	0	0	0	0	0	0	0	0
PD9578a	304	0	0	0	0	0	0	195	0	0	0	0	0	0	0	473	0	0	0	0	0	0	0	0	0	0	0	0	0	114
PD9579a	420	43	0	0	1097	0	0	0	0	0	0	0	72	0	0	0	0	0	0	0	0	0	0	0	0	0	0	0	0	0
PD9581a	523	0	460	0	0	0	0	0	0	0	0	0	0	0	0	495	0	0	0	0	0	0	0	0	0	0	0	0	0	136
PD9582a	1045	115	801	0	0	0	0	587	0	0	0	0	189	0	0	0	0	0	0	0	0	0	0	0	0	0	0	0	0	0
PD9584a	820	143	0	0	1485	0	0	303	0	0	0	0	0	0	0	0	0	0	0	0	0	0	0	0	0	0	0	0	0	0
PD9585a	809	0	4682	0	0	0	0	3520	0	0	0	0	1271	0	0	0	0	0	0	0	0	0	0	0	0	0	0	0	0	0
PD9589a	421	163	0	0	828	0	0	0	0	0	0	0	0	0	0	0	0	0	0	0	0	0	0	0	0	0	0	0	0	0
PD9591a	447	66	0	0	781	0	0	0	0	0	0	0	0	0	0	0	0	0	0	0	0	0	0	0	0	0	0	0	0	0
PD9592a	728	0	7273	0	0	0	0	0	0	0	0	0	493	0	0	0	0	0	0	0	0	0	0	0	0	0	0	0	0	0
PD9593a	472	0	0	0	949	0	65	0	0	0	0	0	0	0	0	0	0	129	0	0	0	0	0	0	0	0	0	0	0	0
PD9595a	1217	0	4785	0	0	0	0	2418	995	0	0	0	304	0	0	0	0	0	0	0	0	0	0	0	0	0	0	0	0	0
PD9597a	792	1310	0	0	0	0	0	0	0	0	0	0	807	0	0	0	0	0	0	0	0	0	0	0	0	0	0	0	0	0
PD9599a	1405	163	0	0	0	0	0	521	0	0	0	0	287	0	0	916	0	0	0	0	0	0	0	0	0	0	0	0	0	0
PD9600a	613	0	758	0	573	0	73	0	0	0	0	0	0	0	0	0	0	0	0	0	0	0	0	0	0	0	0	0	0	0
PD9605a	857	141	0	0	1325	0	0	779	0	0	0	0	0	0	0	0	0	269	0	0	0	0	0	0	0	0	0	0	0	0
PD9606a	501	0	0	0	0	0	0	283	0	0	0	0	0	0	80	356	0	0	0	0	0	0	0	0	0	0	0	0	0	0
PD9694a	834	0	735	0	0	0	0	0	0	0	0	0	0	0	0	0	0	0	0	0	0	0	0	0	0	0	0	0	0	141
PD9696a	457	0	3409	0	0	0	0	1299	0	0	0	0	698	0	0	0	0	0	0	0	0	0	0	0	0	0	0	0	0	0
PD9702a	528	0	6104	0	0	0	0	0	0	0	0	0	1227	0	0	0	0	0	0	0	0	0	0	0	0	0	0	0	0	0
PD9752a	1125	275	0	0	1687	0	0	0	0	0	0	0	387	0	0	0	0	0	0	0	0	0	0	0	0	0	0	0	0	0
PD9754a	666	84	0	0	689	0	0	456	0	0	0	0	0	0	0	0	0	0	0	0	0	0	0	0	0	0	0	0	0	0
PD9755a	480	74	0	0	0	0	0	428	0	0	0	0	0	0	0	376	0	0	0	0	0	0	0	0	0	0	0	0	0	349
PD9756a	683	1407	1092	0	0	0	0	0	0	0	0	0	1028	0	0	0	0	0	0	0	0	0	0	0	0	0	0	0	0	0
PD9759a	676	158	0	0	1356	0	0	0	0	0	0	0	0	0	0	0	0	0	0	0	0	0	0	0	0	0	0	0	0	0
PD9760a	1198	546	1626	0	1030	0	0	0	0	0	0	0	603	0	0	0	0	0	0	0	0	0	0	0	0	0	0	0	0	0
PD9761a	776	103	0	0	0	0	0	557	0	0	0	0	0	0	0	473	0	0	191	0	0	0	0	0	0	0	0	0	0	0
PD9842a	758	0	0	0	1888	0	0	0	0	0	0	0	160	0	0	0	0	0	0	0	0	0	0	0	0	0	0	0	0	393
PD9843a	331	0	0	0	1163	0	0	515	0	0	0	0	0	0	0	0	0	0	0	0	0	0	0	0	0	0	0	0	0	0
PD9844a	83	15	0	0	250	0	0	0	0	0	0	0	0	0	0	0	0	0	64	0	0	0	0	0	0	0	0	0	93	0
PD9845a	531	230	0	0	1898	0	0	0	0	0	0	0	150	0	0	0	0	0	0	0	0	0	0	0	0	0	0	0	0	336
PD9847a	485	0	0	0	1392	0	0	351	0	0	0	0	0	0	0	0	0	0	0	0	0	0	0	0	0	0	0	0	0	0
PD11353a	773	69	0	0	1353	0	0	646	0	0	0	0	0	0	0	0	0	0	0	0	0	0	0	0	0	0	0	0	0	0
PD11354a	1079	0	0	0	895	0	0	732	0	0	0	0	0	0	0	0	0	0	0	0	0	0	0	0	0	0	0	0	0	0
PD11378a	573	0	0	0	0	0	0	595	0	0	0	0	0	0	0	768	0	0	0	0	0	0	0	0	0	0	0	0	0	382
PD12664a	751	0	0	0	1027	0	0	501	0	0	174	0	199	0	0	0	0	0	0	0	0	0	0	0	0	0	0	0	0	0
PD13352a	450	75	0	0	1200	0	0	0	0	0	0	0	0	0	0	0	0	0	0	0	0	0	0	0	0	0	0	0	0	0
PD13353a	778	129	0	0	1486	0	0	0	0	0	0	0	159	0	0	0	0	0	0	0	0	0	0	0	0	0	0	0	0	0
PD13357a	904	651	1116	0	0	0	0	0	0	0	0	0	1130	0	0	0	0	0	0	0	0	0	0	0	0	0	0	0	0	0
PD13358a	533	90	576	0	0	0	0	0	0	0	0	0	0	0	0	242	0	0	0	0	0	0	0	0	0	0	0	0	0	0
PD13359a	378	94	0	0	329	0	0	272	0	0	0	0	0	0	0	0	0	0	0	0	0	0	0	0	0	0	0	0	0	0
PD13632a	0	0	6188	0	0	0	0	0	0	0	0	0	12451	0	0	0	0	0	0	0	0	0	0	0	0	0	0	0	0	0
PD13633a	1350	597	0	0	2186	0	0	0	0	0	0	0	543	0	0	0	0	0	0	0	0	0	0	0	0	0	0	0	0	0
PD13769a	0	7931	0	0	0	0	0	0	0	0	0	0	4787	0	0	0	0	0	0	0	0	0	0	0	0	0	0	0	0	0
PD14434a	0	0	1797	0	0	432	0	1293	0	0	209	0	426	0	0	999	0	0	0	0	0	0	0	0	0	0	0	0	0	0
PD14436a	569	197	0	0	1260	0	0	539	0	0	0	0	0	0	0	0	0	0	0	0	0	0	0	0	0	0	0	0	0	0
PD14443a	941	424	0	0	1238	0	0	979	0	0	0	0	233	0	0	0	0	0	0	0	0	0	0	0	0	0	0	0	0	0
PD14444a	379	108	432	0	828	0	0	0	0	0	0	0	0	0	0	0	0	0	0	0	0	0	0	0	0	0	0	0	0	0
PD14445a	414	0	0	0	0	0	0	298	0	0	0	0	59	0	0	330	0	0	0	0	0	0	0	0	0	0	0	0	0	121
PD14446a	725	353	2568	0	0	0	0	2435	0	0	455	0	904	0	0	0	0	486	0	0	0	0	0	0	0	0	0	0	0	0
PD14447a	580	0	0	0	0	0	0	525	0	0	73	0	51	0	0	481	0	0	0	0	0	0	0	0	0	0	0	0	0	0
PD14449a	799	205	0	0	1394	0	0	553	0	0	0	0	0	0	0	0	0	0	0	0	0	0	0	0	0	0	0	0	0	0
PD14452a	669	140	2650	0	0	0	0	1189	0	0	0	0	423	0	0	0	0	0	0	0	0	0	0	0	0	0	0	0	0	0
PD14455a	0	22689	0	0	0	0	0	0	0	0	0	0	17206	0	0	0	0	0	0	0	0	0	0	0	0	0	0	0	0	0
PD14466a	774	316	0	0	1486	0	0	987	0	0	0	0	253	0	0	0	0	0	0	0	0	0	0	0	0	0	0	0	0	0
PD14469a	1693	576	2758	0	3457	0	0	0	0	0	0	0	965	0	0	0	0	0	0	0	0	0	0	0	0	0	0	0	0	0
PD14470a	609	0	0	0	0	0	0	340	0	0	0	0	0	0	0	420	0	0	0	0	0	0	0	0	0	0	0	0	0	0
PD14474a	867	0	0	0	1147	0	0	1025	0	0	0	0	167	0	0	0	0	0	0	0	0	0	0	0	0	0	0	0	0	0
PD17976a	887	0	0	0	949	0	0	0	0	0	0	0	0	0	0	0	0	0	0	0	0	0	0	0	0	0	0	0	0	0
PD17982a	526	0	0	0	780	0	98	0	0	0	0	0	0	0	0	0	0	0	0	0	0	0	0	0	0	0	0	0	0	0
PD17986a	0	0	1694	0	1230	0	0	1151	0	0	0	0	179	0	0	0	0	0	0	0	0	0	0	0	0	0	0	0	0	0
PD17996a	890	155	0	0	712	0	0	609	0	0	0	0	122	0	0	0	0	0	0	0	0	0	0	0	0	0	0	0	0	0
PD18006a	404	0	0	0	0	0	0	412	0	0	0	0	0	0	0	623	0	0	0	0	0	0	0	0	0	0	0	0	0	87
PD18007a	787	0	5084	0	2127	0	0	0	0	0	0	0	0	0	0	0	0	0	0	0	0	0	0	0	0	0	0	0	0	0
PD18008a	532	231	3829	0	0	0	0	4055	0	0	0	0	604	0	0	0	0	1425	0	0	0	0	0	0	0	0	0	0	0	0
PD18010a	916	0	1522	0	0	0	0	0	0	0	0	0	0	0	0	787	199	0	0	0	0	0	0	0	0	0	0	0	0	215
PD18111a	426	0	0	0	992	0	0	0	0	0	0	0	0	0	0	0	0	0	0	0	0	0	0	0	0	0	0	0	0	155
PD18170a	932	481	884	0	0	0	0	0	0	0	0	0	413	0	0	938	0	0	0	0	0	0	0	0	0	0	0	0	0	0
PD18175a	1095	140	0	0	3757	0	0	0	1127	0	0	0	204	0	0	0	0	0	0	0	0	0	0	0	0	0	183	0	0	0
PD18178a	508	82	0	0	1164	0	0	460	0	0	0	0	0	0	0	0	0	0	186	0	0	0	0	0	0	0	0	0	0	0
PD18184a	2065	601	0	0	2026	0	0	1749	0	0	0	0	0	0	0	0	0	0	0	0	0	0	0	0	0	0	0	0	0	0
PD18233a	386	515	1803	0	0	0	0	1150	0	0	0	0	377	0	0	0	0	0	0	0	0	0	0	0	0	0	0	0	0	0
PD18237a	0	867	6360	0	0	0	0	7031	0	0	0	0	1660	0	0	0	0	0	0	0	0	0	0	0	0	0	0	0	0	0
PD18758a	408	0	0	0	782	0	92	0	0	0	0	0	0	0	118	0	0	0	0	0	0	0	0	0	0	0	0	0	0	0
PD18760a	680	0	0	0	0	0	62	604	0	0	0	0	0	0	0	0	0	189	0	0	0	0	0	0	0	0	0	0	0	0
PD18761a	375	71	0	0	0	0	0	365	0	0	0	0	0	0	0	497	0	0	0	0	0	0	0	0	0	0	0	0	0	0
PD18762a	370	47	0	0	399	0	0	0	0	0	0	0	0	0	0	487	0	0	0	0	0	0	0	0	0	0	0	0	0	0
PD18763a	526	73	0	0	0	0	81	319	0	0	0	0	0	0	0	397	0	0	0	0	0	0	0	0	0	0	0	0	0	0
PD18764a	365	0	0	0	0	0	0	272	0	0	0	0	0	0	0	345	0	0	0	0	0	0	0	0	0	0	0	0	0	0
PD18765a	680	0	434	0	1210	0	0	0	0	0	0	0	0	0	0	0	0	0	0	0	0	0	0	0	0	0	0	0	0	0
PD18772a	468	91	0	0	594	0	0	0	0	0	0	0	0	0	0	0	0	0	0	0	0	0	0	0	0	0	0	0	0	0
PD18777a	578	0	1779	0	0	0	0	0	0	0	0	0	0	0	0	0	0	0	0	0	0	0	0	0	0	0	0	0	0	0
PD20341a	471	0	0	0	790	0	0	0	0	0	0	0	0	0	0	0	0	0	0	0	0	0	0	0	0	0	0	0	0	0
PD20342a	305	0	0	0	1046	0	0	570	0	0	0	0	0	0	0	0	0	0	0	0	0	0	0	0	0	0	0	0	0	171
PD20343a	515	90	0	0	1242	0	0	0	0	0	0	0	0	0	0	0	0	666	0	0	0	0	0	0	0	0	0	0	0	0
PD20344a	636	0	2841	0	1663	0	0	2095	0	0	0	0	680	0	0	0	0	0	0	0	0	0	0	0	0	0	0	0	0	0
PD20345a	171	0	0	0	422	0	0	0	0	0	0	0	0	0	0	372	0	0	0	0	0	0	0	0	0	0	0	0	0	0
PD20347a	415	0	0	0	1340	0	0	360	0	0	0	0	107	0	0	0	0	0	0	0	0	0	0	0	0	0	0	0	0	0
PD20348a	522	0	0	0	1160	0	0	528	0	0	0	0	101	0	0	0	0	0	0	0	0	0	0	0	0	0	0	0	0	0
PD20400a	461	0	0	0	830	0	0	223	0	0	0	0	42	0	0	0	0	0	0	0	0	0	0	0	0	0	0	0	0	0
PD20401a	809	79	0	0	1138	0	0	603	0	0	0	0	141	0	0	0	0	0	0	0	0	0	0	0	0	0	0	0	0	0
PD20403a	679	138	0	0	1024	0	0	0	0	0	0	0	0	0	0	0	0	0	0	0	0	0	0	0	0	0	0	0	0	0
PD20404a	859	149	0	0	1299	0	0	641	0	0	261	0	0	0	0	0	0	0	0	0	0	0	0	0	0	0	0	0	0	0
PD20405a	558	65	451	0	0	0	0	0	0	0	0	0	0	0	0	317	0	0	0	0	0	0	0	0	0	0	0	0	0	0
PD4075a	553	0	0	0	0	0	0	316	0	0	0	0	0	0	0	283	0	0	0	0	0	0	0	0	0	0	0	0	0	0
PD6700a2	1592	0	0	0	0	0	0	539	0	0	0	856	0	0	0	0	0	0	0	0	0	0	0	0	0	0	0	0	0	0
PD6701a2	1085	0	0	0	2041	0	0	726	0	0	0	0	116	0	0	0	0	0	0	0	0	0	0	0	0	0	0	0	0	402
PD7239a	328	246	0	0	1809	0	0	0	0	0	0	0	0	0	0	0	0	0	0	0	0	0	0	0	0	0	0	212	0	231
PD7308a	1920	0	2528	0	0	0	0	0	1208	0	0	0	379	0	0	0	0	0	0	0	0	0	0	0	0	0	0	0	0	0
PD7310a	601	246	0	0	1014	0	0	416	0	0	0	0	0	0	0	0	0	0	0	0	0	0	0	0	0	0	0	0	0	0
PD7311a	606	54	0	0	821	0	0	0	0	0	0	0	0	0	0	0	0	239	0	0	0	0	0	0	0	0	0	0	0	0
PD7314a	856	0	0	0	1153	0	0	280	0	0	0	0	0	0	0	0	0	0	0	0	0	0	0	0	0	0	0	0	0	0
PD7317a	547	191	479	0	1049	0	0	0	0	0	0	0	0	0	0	0	0	0	0	0	0	0	0	0	0	0	0	0	0	0
PD7319a	647	0	564	0	0	0	0	0	0	0	0	0	0	0	135	526	0	0	0	0	0	0	0	0	0	0	0	0	0	0
PD7454a	1509	0	0	0	2010	0	0	0	0	0	0	0	0	0	0	0	0	0	0	0	0	0	0	0	0	0	0	0	0	0
PD7455a	574	132	0	0	1048	0	0	0	0	0	0	0	265	0	0	0	0	0	0	0	0	0	0	0	0	0	0	0	0	0
PD8823a	502	200	0	0	671	0	0	636	0	0	0	0	0	0	0	0	0	0	0	0	0	0	0	0	0	0	0	0	0	0
PD8826a	310	45	0	0	924	0	0	0	0	0	0	0	0	0	0	0	0	104	0	0	0	0	0	0	0	0	0	0	0	0
PD9066a	556	1270	0	0	1240	0	0	0	0	0	0	0	537	0	0	0	0	0	0	0	0	0	0	0	0	0	0	0	0	0
PD9590a	207	80	0	0	477	0	0	252	0	0	0	0	108	0	0	0	0	0	0	0	0	0	0	0	0	0	0	0	0	0
PD9596a	333	78	0	0	1112	0	0	0	0	0	0	0	0	0	0	0	0	0	0	0	0	0	0	0	0	0	0	0	0	0

## Sheet: (f)30Sigs_alpha0.02
(f) Exposure in 640 breast cancer WGS using thirty consensus signatures alpha 0.02
Sample	Signature.1	Signature.2	Signature.3	Signature.4	Signature.5	Signature.6	Signature.7	Signature.8	Signature.9	Signature.10	Signature.11	Signature.12	Signature.13	Signature.14	Signature.15	Signature.16	Signature.17	Signature.18	Signature.19	Signature.20	Signature.21	Signature.22	Signature.23	Signature.24	Signature.25	Signature.26	Signature.27	Signature.28	Signature.29	Signature.30	MMR_deficient_samples
PD11365a	0	0	0	0	0	0	0	0	3372	0	0	10279	0	0	0	0	0	0	0	0	0	0	0	0	0	0	0	0	0	0	MMR_deficient
PD23561a	0	22422	0	0	0	0	0	0	0	0	0	0	35605	0	0	0	0	0	0	0	0	0	0	0	0	0	0	0	0	0	MMR_deficient
PD23564a	30319	0	0	0	0	33268	0	0	0	0	0	19859	0	0	0	0	0	0	0	0	0	0	0	0	0	0	0	0	0	0	MMR_deficient
PD23579a	0	0	0	0	38207	24112	0	0	0	0	0	0	0	0	0	0	0	0	0	24991	0	0	0	0	0	0	0	0	0	0	MMR_deficient
PD24189a	0	0	0	0	0	12343	0	0	0	0	0	17246	0	0	0	0	0	0	0	0	0	0	0	0	0	0	0	0	0	0	MMR_deficient
PD24193a	0	438	0	0	0	5679	0	0	0	0	0	5118	0	0	0	0	0	0	0	0	0	0	0	0	0	0	0	0	0	0	MMR_deficient
PD24320a	1572	0	0	0	0	0	0	0	0	0	0	0	0	0	0	0	0	0	0	0	0	0	0	0	0	14122	0	0	0	0	MMR_deficient
PD5937a	0	29853	0	0	0	0	0	0	0	0	0	0	18248	0	0	0	0	0	0	27994	0	0	0	0	0	0	0	0	0	0	MMR_deficient
PD6412a	0	0	0	0	0	10847	0	0	0	0	0	14339	0	0	0	0	0	0	0	0	0	0	0	0	0	0	0	0	0	0	MMR_deficient
PD9604a	1643	0	0	0	0	0	0	0	0	0	0	0	0	0	0	0	0	0	0	0	0	0	0	0	0	9025	0	0	0	0	MMR_deficient
PD7318a	0	0	0	0	0	13162	0	0	0	0	0	7532	0	0	0	0	0	0	0	0	0	0	0	0	0	0	0	0	0	0	MMR_deficient
PD10010a	563	0	822	0	864	0	0	0	0	0	0	0	180	0	0	0	0	0	0	0	0	0	0	0	0	0	0	0	0	0
PD10011a	848	0	4416	0	0	0	0	0	3006	0	0	0	0	0	0	0	0	0	0	0	0	0	0	0	0	0	0	0	0	0
PD10014a	0	0	7241	0	0	839	0	4044	0	0	0	0	0	0	0	0	0	0	0	0	0	0	0	0	0	0	0	0	0	0
PD11326a	0	0	5230	0	0	0	0	3588	0	0	0	0	808	0	0	0	0	0	0	0	0	0	0	0	0	0	0	0	0	0
PD11327a	0	0	6778	0	0	0	0	5139	0	0	0	0	796	0	0	0	0	0	0	0	0	0	0	0	0	0	0	0	0	0
PD11336a	1310	644	0	0	0	0	0	2736	0	0	331	0	0	0	0	0	0	0	0	0	0	0	0	0	0	0	0	560	0	0
PD11337a	669	281	0	0	0	0	0	1826	0	0	0	0	295	0	0	0	0	0	0	0	0	0	0	0	0	0	0	0	0	0
PD11338a	747	0	0	0	1552	0	0	0	0	0	0	0	0	0	0	0	0	0	0	0	0	0	0	0	0	0	0	0	0	0
PD11339a	1163	0	0	0	0	0	0	541	0	0	0	0	0	0	0	824	0	0	0	0	0	0	0	0	0	0	0	0	0	0
PD11340a	995	303	0	0	0	0	0	2252	657	0	548	0	307	0	0	0	0	0	0	0	0	0	0	0	0	0	0	0	0	0
PD11341a	464	219	0	0	878	0	0	0	0	0	0	0	89	0	0	0	0	0	0	0	0	0	0	0	0	0	0	0	0	0
PD11342a	701	825	0	0	1467	0	0	0	0	0	0	0	309	0	0	0	0	0	0	0	0	0	0	0	0	0	0	0	0	0
PD11343a	788	233	0	0	1383	0	0	538	0	0	0	0	0	0	0	0	0	0	0	0	0	0	0	0	0	0	0	0	0	0
PD11344a	0	5023	0	0	0	0	0	0	0	0	0	0	6004	0	0	0	0	0	0	0	0	0	0	0	0	0	0	0	0	0
PD11345a	0	4088	0	0	0	0	0	3852	0	0	0	0	2410	0	0	0	0	0	0	0	0	0	0	0	0	0	0	0	0	0
PD11346a	591	376	0	0	1087	0	0	0	0	0	0	0	235	0	0	0	0	0	0	0	0	0	0	0	0	0	0	0	0	0
PD11347a	484	481	0	0	1065	0	0	0	0	0	0	0	0	0	0	0	0	0	0	0	0	0	0	0	0	0	0	0	0	0
PD11348a	1740	0	0	0	1403	0	0	1686	0	0	0	0	180	0	0	0	0	0	0	0	0	0	0	0	0	0	0	0	0	0
PD11349a	1044	1084	0	0	4430	0	0	0	0	0	0	0	889	0	0	0	0	0	0	0	0	0	0	0	0	0	0	0	0	0
PD11352a	795	402	0	0	1387	0	0	0	0	0	0	0	0	0	0	0	0	0	0	0	0	0	0	0	0	0	0	0	0	0
PD11355a	416	0	0	0	1107	0	0	0	0	0	0	0	0	0	0	0	0	313	0	0	0	0	0	0	0	0	0	0	0	0
PD11357a	1195	0	0	0	2183	0	0	0	0	0	0	0	0	0	0	0	0	0	0	0	0	0	0	0	0	0	0	0	0	0
PD11358a	839	1432	0	0	0	0	0	2055	0	0	0	0	0	0	0	0	0	0	0	0	0	0	0	0	0	0	0	0	0	0
PD11359a	778	215	0	0	1672	0	0	0	0	0	0	0	0	0	0	0	0	0	0	0	0	0	0	0	0	0	0	0	0	0
PD11360a	1042	164	0	0	1908	0	0	0	0	0	0	0	0	0	0	0	0	0	0	0	0	0	0	0	0	0	0	0	0	0
PD11361a	751	126	0	0	0	0	0	844	0	0	0	0	0	0	0	0	0	0	0	0	0	0	0	0	0	0	0	0	0	0
PD11364a	733	0	0	0	1492	0	0	0	0	0	0	0	112	0	0	0	0	0	0	0	0	0	0	0	0	0	0	0	0	0
PD11366a	730	156	0	0	2117	0	0	0	0	0	0	0	0	0	0	0	0	0	0	0	0	0	0	0	0	0	0	0	0	0
PD11367a	1136	0	3073	0	2070	0	0	1883	0	0	0	0	0	0	0	0	0	0	0	0	0	0	0	0	0	0	0	0	0	0
PD11368a	1263	1855	0	0	3206	0	0	0	0	0	0	0	502	0	0	0	0	0	0	0	0	0	0	0	0	0	0	0	0	0
PD11369a	1732	956	0	0	2914	0	0	0	0	0	0	0	531	0	0	0	0	0	0	0	0	0	0	0	0	0	0	0	0	0
PD11370a	427	0	329	0	0	0	0	0	0	0	0	0	0	0	0	521	0	0	0	0	0	0	0	0	0	0	0	0	0	0
PD11372a	0	4467	0	0	0	0	0	0	0	0	0	0	9325	0	0	0	0	0	0	0	0	0	0	0	0	0	0	0	0	0
PD11374a	595	0	0	0	1703	0	0	0	0	0	0	0	84	0	0	0	0	0	0	0	0	0	0	0	0	0	0	0	0	0
PD11375a	735	0	0	0	688	0	0	509	0	0	0	0	0	0	0	0	0	0	0	0	0	0	0	0	0	0	0	0	0	0
PD11376a	1122	138	0	0	1891	0	0	0	0	0	0	0	0	0	0	0	0	0	0	0	0	0	0	0	0	0	0	0	0	0
PD11379a	0	6634	0	0	0	0	0	0	0	0	0	0	12747	0	0	0	0	0	0	0	0	0	0	0	0	0	0	0	0	0
PD11380a	737	244	0	0	1738	0	0	0	0	0	0	0	0	0	0	0	0	0	0	0	0	0	0	0	0	0	0	0	0	0
PD11381a	428	145	0	0	1522	0	0	0	0	0	0	0	0	0	0	0	0	0	0	0	0	0	0	0	0	0	0	0	0	0
PD11383a	608	0	0	0	1389	0	0	581	0	0	0	0	0	0	0	0	0	0	0	0	0	0	0	0	0	0	0	0	0	0
PD11384a	573	112	0	0	917	0	0	0	0	0	0	0	121	0	0	0	0	0	0	0	0	0	0	0	0	0	0	0	0	0
PD11385a	502	0	0	0	758	0	140	485	0	0	0	0	0	0	0	0	0	0	0	0	0	0	0	0	0	0	0	0	0	0
PD11386a	814	672	0	0	1895	0	0	0	0	0	0	0	0	0	0	0	0	0	0	0	0	0	0	0	0	0	0	0	0	0
PD11388a	1438	0	0	0	0	0	0	1881	0	0	0	0	261	0	0	0	0	0	0	0	0	0	0	0	0	0	0	0	0	1406
PD11389a	411	0	0	0	1265	0	0	0	0	0	0	0	0	0	0	0	0	0	0	0	0	0	0	0	0	0	0	0	0	0
PD11391a	264	0	0	0	1009	0	0	0	0	0	0	0	0	0	0	0	0	0	0	0	0	0	0	0	0	0	0	0	0	0
PD11393a	1714	0	0	0	0	0	0	2136	0	0	0	0	0	0	0	0	0	817	0	0	0	0	0	0	0	0	0	0	0	0
PD11394a	1335	0	0	0	0	0	0	873	0	0	0	0	0	0	0	0	0	0	0	0	0	0	0	0	0	0	0	0	0	0
PD11395a	909	209	0	0	1429	0	0	961	0	0	0	0	0	0	0	0	281	0	0	0	0	0	0	0	0	0	0	0	0	0
PD11396a	675	122	0	0	1637	0	0	0	0	0	0	0	0	0	0	0	0	0	0	0	0	0	0	0	0	0	0	0	0	0
PD11397a	1268	222	0	0	1233	0	0	1732	0	0	0	0	369	0	0	0	0	0	0	0	0	0	0	0	0	0	0	0	0	0
PD11398a	671	0	1124	0	550	0	0	0	0	0	0	0	0	0	0	0	0	0	0	0	0	0	0	0	0	0	0	0	0	0
PD11399a	1206	347	0	0	1942	0	0	0	0	0	0	0	0	0	0	0	0	0	0	0	0	0	0	0	0	0	0	0	0	0
PD11402a	781	0	0	0	1854	0	0	0	0	0	0	0	0	0	0	0	0	0	0	0	0	0	0	0	0	0	0	0	0	0
PD11462a	1021	0	0	0	1689	0	0	0	0	0	0	0	128	0	0	0	0	0	0	0	0	0	0	0	0	0	0	0	0	0
PD11464a	0	1023	1914	0	0	0	0	0	0	0	0	0	1559	0	0	0	0	0	0	0	0	0	0	0	0	0	0	0	0	0
PD11465a	0	5115	0	0	10029	0	0	0	0	0	0	0	7406	0	0	0	0	0	0	0	0	0	0	0	0	0	0	0	0	0
PD11740a	698	0	0	0	1635	0	0	0	0	0	0	0	0	0	0	0	0	0	0	0	0	0	0	0	0	0	0	0	0	0
PD11741a	538	100	0	0	0	0	0	1207	0	0	0	0	129	0	0	0	0	0	0	0	0	0	0	0	0	0	0	0	0	0
PD11742a	0	382	0	0	3791	0	0	1859	0	0	0	0	970	0	0	0	0	0	0	0	0	0	0	0	0	0	0	0	0	0
PD11743a	671	141	1474	0	1021	0	0	0	0	0	0	0	0	0	0	0	0	0	0	0	0	0	0	0	0	0	0	0	0	0
PD11744a	590	0	0	0	1291	0	0	0	0	0	0	0	0	0	0	0	0	0	0	0	0	0	0	0	0	0	0	0	0	0
PD11745a	512	225	0	0	954	0	0	1149	0	0	0	0	176	0	0	0	0	0	0	0	0	0	0	0	0	0	0	0	0	0
PD11748a	1173	0	7599	0	0	0	0	2987	0	0	0	0	0	0	0	0	0	0	0	0	0	0	0	0	0	0	0	0	0	0
PD11750a	0	0	7320	0	0	0	0	0	0	0	0	0	2757	0	0	0	0	0	0	0	0	0	0	0	0	0	0	0	0	0
PD11751a	1742	0	12840	0	0	0	0	0	0	0	0	0	2064	0	0	0	0	0	0	0	0	0	0	0	0	0	0	0	0	0
PD11752a	2562	0	0	0	4256	0	0	0	0	0	0	0	0	0	0	0	0	816	0	0	0	0	0	0	0	0	0	0	0	0
PD11753a	1133	0	3701	0	0	0	0	0	1086	0	0	0	0	0	0	0	0	0	0	0	0	0	0	0	0	0	0	0	0	937
PD11755a	304	0	2331	0	0	0	0	0	0	0	0	0	139	0	0	0	0	0	0	0	0	0	0	0	0	0	0	0	0	0
PD11756a	658	242	0	0	870	0	0	0	0	0	0	0	0	0	0	0	0	0	0	0	0	0	0	0	0	0	0	0	0	0
PD11757a	0	0	1464	0	0	0	0	0	0	0	0	0	487	0	0	0	0	0	0	0	0	0	0	0	0	0	0	0	0	0
PD11760a	1462	0	0	0	1678	0	0	0	0	0	0	0	0	0	0	0	0	950	0	0	0	0	0	0	0	0	0	0	0	0
PD11761a	409	169	960	0	0	0	0	0	0	0	0	0	0	0	0	839	0	0	0	0	0	0	0	0	0	0	0	0	0	328
PD11762a	458	202	0	0	1073	0	0	0	0	0	0	0	0	0	0	0	0	0	0	0	0	0	0	0	0	0	0	0	0	0
PD11765a	399	0	0	0	1487	0	0	0	0	0	0	0	115	0	0	0	0	0	0	0	0	0	0	0	0	0	0	0	0	0
PD11766a	340	103	0	0	1099	0	0	0	0	0	0	0	151	0	0	0	0	0	0	0	0	0	0	0	0	0	0	0	0	0
PD11767a	216	0	0	0	652	0	0	0	0	0	0	0	0	0	0	0	0	0	0	0	0	0	0	0	0	0	0	0	0	0
PD11769a	662	135	0	0	923	0	0	0	0	0	0	0	0	0	0	0	0	0	0	0	0	0	0	0	0	0	0	0	0	0
PD11816a	499	592	0	0	2230	0	0	0	0	0	0	0	688	0	0	0	0	0	0	0	0	0	0	0	0	0	0	0	0	0
PD11818a	419	0	0	0	1116	0	0	0	0	0	0	0	68	0	0	0	0	0	0	0	0	0	0	0	0	0	0	0	0	0
PD11819a	492	0	0	0	1193	0	0	0	0	0	0	0	0	0	0	0	0	0	0	0	0	0	0	0	0	0	0	0	0	0
PD13162a	0	463	2810	0	0	0	0	0	0	0	0	0	2130	0	0	0	0	0	0	0	0	0	0	0	0	0	0	0	0	0
PD13163a	938	717	0	0	2990	0	0	0	0	0	0	0	707	0	0	0	0	0	0	0	0	0	0	0	0	0	0	0	0	0
PD13164a	597	85	0	0	1139	0	0	779	0	0	0	0	119	0	0	0	0	0	0	0	0	0	0	0	0	0	0	0	0	0
PD13165a	1382	1230	0	0	0	0	0	2325	0	0	0	0	612	0	0	0	0	790	0	0	0	0	0	0	0	0	0	0	0	0
PD13166a	594	138	0	0	0	0	0	734	0	0	0	0	303	0	0	559	0	0	0	0	0	0	0	0	0	0	0	0	0	0
PD13167a	864	142	0	0	1241	0	0	0	0	0	0	0	156	0	0	0	0	0	0	0	0	0	0	0	0	0	0	0	0	0
PD13168a	872	527	0	0	1127	0	0	0	0	0	0	0	0	0	0	0	0	0	0	0	0	0	0	0	0	0	0	0	0	0
PD13296a	1343	0	15108	0	0	0	0	0	0	0	0	0	2129	0	0	0	0	0	0	0	0	0	0	0	0	0	0	0	0	0
PD13297a	0	0	7110	0	0	0	0	0	0	0	0	0	0	0	0	0	0	0	0	0	0	0	0	0	0	0	0	0	0	7871
PD13298a	1400	0	0	0	4229	0	0	1928	0	0	0	0	807	0	0	0	0	0	0	0	0	0	0	0	0	0	0	0	0	0
PD13299a	0	945	5912	0	0	0	0	0	0	0	0	0	3877	0	0	0	0	0	0	0	0	0	0	0	0	0	0	0	0	0
PD13302a	1370	291	0	0	3233	0	0	0	0	0	0	0	0	0	0	0	0	0	0	0	0	0	0	0	0	0	0	0	0	0
PD13304a	623	0	0	0	893	0	0	0	0	0	0	0	0	0	0	0	0	0	0	0	0	0	0	0	0	0	0	0	0	0
PD13306a	546	362	0	0	1117	0	0	0	0	0	0	0	0	0	0	0	0	0	0	0	0	0	0	0	0	0	0	0	0	0
PD13307a	0	2050	0	0	0	0	0	2305	0	0	0	0	996	0	0	0	0	0	0	0	0	0	0	0	0	0	0	0	0	0
PD13310a	764	0	0	0	1066	0	0	0	0	0	0	0	0	0	0	0	0	0	0	0	0	0	0	0	0	0	0	0	0	0
PD13311a	319	0	3548	0	0	0	0	0	641	0	0	0	0	0	0	0	0	0	0	0	0	0	0	0	0	0	0	0	0	0
PD13312a	494	0	0	0	1539	0	0	0	0	0	0	0	0	0	0	0	0	0	0	0	0	0	0	0	0	0	0	0	0	0
PD13416a	625	0	0	0	1183	0	130	0	0	0	0	0	0	0	0	0	0	0	0	0	0	0	0	0	0	0	0	0	0	0
PD13418a	1394	1104	2277	0	0	0	0	0	0	0	0	0	2031	0	0	0	0	0	0	0	0	0	0	0	0	0	0	0	0	0
PD13419a	407	72	0	0	0	0	0	0	0	0	0	0	0	0	0	612	0	0	0	0	0	0	0	0	0	0	0	0	0	0
PD13420a	769	0	627	0	0	0	0	0	0	0	0	0	0	0	0	465	0	0	0	0	0	0	0	0	0	0	0	0	0	0
PD13422a	545	121	0	0	617	0	0	520	0	0	0	0	0	0	0	0	0	0	0	0	0	0	0	0	0	0	0	0	0	0
PD13424a	1354	0	0	0	0	0	214	2155	0	0	0	0	229	0	0	0	0	0	0	0	0	0	0	0	0	0	0	0	0	0
PD13425a	0	5568	0	0	0	0	0	0	0	0	0	0	28933	0	0	0	0	0	0	0	0	0	0	0	0	0	0	0	0	0
PD13426a	870	244	0	0	1583	0	0	0	0	0	0	0	0	0	0	0	0	0	0	0	0	0	0	0	0	0	0	0	0	0
PD13427a	369	0	0	0	764	0	0	0	0	0	0	0	0	0	0	0	0	0	0	0	0	0	0	0	0	0	0	0	0	0
PD13428a	739	0	0	0	2519	0	0	0	0	0	0	0	163	0	0	0	0	0	0	0	0	0	0	0	0	0	0	0	0	0
PD13602a	1156	0	2101	0	1915	0	0	0	0	0	0	0	331	0	0	0	0	408	0	0	0	0	0	0	0	0	0	0	0	0
PD13603a	723	239	0	0	1763	0	0	0	0	0	0	0	337	0	0	0	0	0	0	0	0	0	0	0	0	0	0	0	0	0
PD13604a	0	47841	0	0	0	0	0	0	0	0	0	0	45260	0	0	0	0	0	0	0	0	0	0	0	0	0	0	0	0	0
PD13605a	381	0	0	0	0	0	0	483	0	0	0	0	57	0	0	316	0	0	0	0	0	0	0	0	0	0	0	0	0	0
PD13606a	1433	222	0	0	1655	0	0	2233	0	347	0	0	0	0	0	0	0	0	0	0	0	0	0	0	0	0	0	0	0	0
PD13607a	850	226	0	0	1903	0	0	0	0	0	0	0	307	0	0	0	0	0	0	0	0	0	0	0	0	0	0	0	0	0
PD13608a	944	694	0	0	0	0	0	0	0	0	0	0	1120	0	0	1346	0	0	0	0	0	0	0	0	0	0	0	0	0	0
PD13609a	0	1174	0	0	1547	0	0	0	0	0	0	0	1983	0	0	0	0	0	0	0	0	0	0	0	0	0	0	0	0	0
PD13618a	492	288	0	0	1051	0	0	0	0	0	0	0	0	0	0	0	0	0	0	0	0	0	0	0	0	0	0	0	0	0
PD13619a	711	0	0	0	0	0	0	0	0	0	0	0	0	0	0	1074	0	0	0	0	0	0	0	0	0	0	0	0	0	325
PD13620a	1478	0	0	0	1724	0	0	1055	0	0	0	0	339	0	0	0	0	0	0	0	0	0	0	0	0	0	0	0	0	0
PD13622a	1281	0	0	0	2375	0	0	0	0	0	0	0	0	0	0	0	0	698	0	0	0	0	0	0	0	0	0	0	0	0
PD13623a	0	1448	0	0	1965	0	0	0	0	0	0	0	386	0	0	0	0	0	0	0	0	0	0	0	0	0	0	0	0	0
PD13625a	2256	859	0	0	0	0	0	5129	0	0	0	0	0	0	0	0	2993	0	0	0	0	0	0	0	0	0	0	0	0	0
PD13626a	342	0	0	0	733	0	0	0	0	0	0	0	0	0	0	0	0	0	0	0	0	0	0	0	0	0	0	0	0	0
PD13627a	656	0	7228	0	0	0	0	0	0	0	0	0	556	0	0	0	0	0	0	0	0	0	0	0	0	0	0	0	0	0
PD13629a	512	412	0	0	1104	0	0	0	0	0	0	0	0	0	0	0	0	0	0	0	0	0	0	0	0	0	0	0	0	0
PD13630a	730	597	0	0	1978	0	0	0	0	0	0	0	801	0	0	0	0	0	0	0	0	0	0	0	0	0	0	0	0	0
PD13631a	517	282	0	0	1200	0	0	602	0	0	0	0	0	0	0	0	0	0	0	0	0	0	0	0	0	0	0	0	0	0
PD13752a	590	142	0	0	1413	0	0	661	0	0	0	0	0	0	0	0	0	0	0	0	0	0	0	0	0	0	0	0	0	0
PD13753a	0	2365	0	0	0	0	0	0	0	0	0	0	5629	0	0	0	0	0	0	0	0	0	0	0	0	0	0	0	0	0
PD13754a	666	0	0	0	1722	0	0	0	0	0	0	0	116	0	0	0	0	0	0	0	0	0	0	0	0	0	0	0	0	0
PD13755a	589	0	0	0	0	0	0	0	0	0	0	0	0	0	0	1099	0	0	0	0	0	0	0	0	0	0	0	0	0	246
PD13756a	556	0	0	0	1526	0	0	0	0	0	0	0	0	0	0	0	0	0	0	0	0	0	0	0	0	0	0	0	0	0
PD13757a	373	395	0	0	0	0	0	550	0	0	0	0	167	0	0	0	0	0	0	0	0	0	0	0	0	0	0	0	0	0
PD13758a	405	0	0	0	1569	0	0	0	0	0	0	0	0	0	0	0	0	0	0	0	0	0	0	0	0	0	0	0	0	323
PD13760a	639	0	1813	0	0	0	0	1513	0	0	0	0	666	0	0	0	0	0	0	0	0	0	0	0	0	0	0	0	0	0
PD13761a	337	73	0	0	1276	0	0	0	0	0	0	0	0	0	0	0	0	0	0	0	0	0	0	0	0	0	0	0	0	0
PD13762a	522	0	0	0	0	0	0	453	0	0	0	0	0	0	0	443	0	0	0	0	0	0	0	0	0	0	0	0	0	232
PD13763a	839	130	0	0	1593	0	0	0	0	0	0	0	0	0	0	0	0	0	0	0	0	0	0	0	0	0	0	0	0	0
PD13764a	781	233	0	0	2303	0	0	1116	0	0	0	0	393	0	0	0	0	0	0	0	0	0	0	0	0	0	0	0	0	0
PD13765a	1217	0	0	0	0	0	484	1990	0	0	0	0	0	0	0	0	0	1786	0	0	0	0	0	0	0	0	0	0	0	0
PD13766a	0	1823	0	0	0	0	0	0	0	0	0	0	771	0	0	1241	0	0	0	0	0	0	0	0	0	0	0	0	0	0
PD13767a	618	254	0	0	1217	0	0	548	0	0	0	0	0	0	0	0	0	0	0	0	0	0	0	0	0	0	0	0	0	0
PD13768a	564	0	0	0	787	0	0	0	0	0	0	0	0	0	0	0	0	0	0	0	0	0	0	0	0	0	0	0	0	0
PD13770a	606	114	0	0	1115	0	0	0	0	0	0	0	0	0	0	0	0	242	0	0	0	0	0	0	0	0	0	0	0	0
PD13771a	0	0	6396	0	0	0	0	3915	0	0	1269	0	1507	0	0	0	0	0	0	0	0	0	0	0	0	0	0	0	0	0
PD14432a	437	0	0	0	1149	0	0	0	0	0	0	0	0	0	0	0	0	0	0	0	0	0	0	0	0	0	0	0	0	282
PD14433a	840	1541	0	0	0	0	0	0	0	0	0	0	0	0	0	1199	0	0	0	0	0	0	0	0	0	0	0	0	0	0
PD14435a	1169	195	0	0	2094	0	0	0	0	0	0	0	256	0	0	0	0	0	0	0	0	0	0	0	0	0	0	0	0	0
PD14437a	1059	0	1852	0	0	0	0	898	0	262	0	0	289	0	0	0	0	0	0	0	0	0	0	0	0	0	0	0	0	0
PD14439a	423	76	0	0	815	0	0	0	0	0	0	0	0	0	0	0	0	0	0	0	0	0	0	0	0	0	0	0	0	0
PD14441a	553	0	1304	0	1156	0	0	1416	0	0	0	0	230	0	0	0	0	0	0	0	0	0	0	0	0	0	0	0	0	0
PD14442a	439	0	0	0	871	0	0	435	0	0	0	0	0	0	0	0	0	0	0	0	0	0	0	0	0	0	0	0	0	0
PD14450a	350	71	0	0	876	0	0	0	0	0	0	0	0	0	0	0	0	0	0	0	0	0	0	0	0	0	0	0	0	0
PD14453a	0	2271	5300	0	0	0	0	0	0	0	0	0	2344	0	0	0	0	0	0	0	0	0	0	0	0	0	0	0	0	0
PD14454a	617	105	0	0	902	0	0	676	0	0	0	0	207	0	0	0	0	0	0	0	0	0	0	0	0	0	0	0	0	0
PD14456a	747	0	0	0	1229	0	0	0	0	0	0	0	0	0	0	0	0	0	0	0	0	0	0	0	0	0	0	0	0	0
PD14457a	1188	257	0	0	2255	0	0	0	0	0	0	0	0	0	0	0	0	865	0	0	0	0	0	0	0	0	0	0	0	0
PD14458a	520	0	0	0	795	0	0	0	0	0	0	0	0	0	0	0	0	0	0	0	0	0	0	0	0	0	0	0	0	196
PD14459a	654	123	0	0	865	0	0	0	0	0	0	0	0	0	0	0	0	442	0	0	0	0	0	0	0	0	0	0	0	0
PD14460a	1684	1970	0	0	0	0	0	0	0	0	0	0	868	0	0	0	0	0	0	0	0	0	0	0	0	0	0	0	0	0
PD14461a	590	0	461	0	0	0	0	0	0	0	0	0	0	0	0	384	0	0	0	0	0	0	0	0	0	0	0	0	0	0
PD14462a	891	321	0	0	0	0	0	0	0	0	0	0	271	0	0	1143	0	0	0	0	0	0	0	0	0	0	0	0	0	0
PD14465a	967	209	0	0	1268	0	0	650	0	0	0	0	0	0	0	0	0	0	0	0	0	0	0	0	0	0	0	0	0	0
PD14467a	673	153	0	0	797	0	0	0	0	0	0	0	0	0	0	0	0	0	0	0	0	0	0	0	0	0	0	0	0	0
PD14468a	583	0	0	0	965	0	0	0	0	0	0	0	0	0	0	0	0	0	0	0	0	0	0	0	0	0	0	0	0	0
PD14471a	1405	0	1864	0	0	0	0	0	0	0	0	0	0	0	0	0	0	0	0	0	0	0	0	0	0	0	0	0	0	0
PD14472a	624	314	0	0	1359	0	0	0	0	0	0	0	0	0	0	0	0	0	0	0	0	0	0	0	0	0	0	0	0	0
PD14473a	610	0	0	0	857	0	0	0	0	0	0	0	74	0	0	0	0	0	0	0	0	0	0	0	0	0	0	0	0	0
PD17973a	544	0	0	0	936	0	0	0	0	0	0	0	0	0	0	0	0	544	0	0	0	0	0	0	0	0	0	0	0	0
PD17981a	2403	1529	0	0	2071	0	0	0	0	0	0	0	0	0	0	0	0	959	0	0	0	0	0	0	0	0	0	0	0	0
PD17991a	440	0	0	0	781	0	0	0	0	0	0	0	0	0	0	0	0	0	0	0	0	0	0	0	0	0	0	0	0	0
PD17994a	463	282	0	0	560	0	0	0	0	0	0	0	0	0	0	0	0	0	0	0	0	0	0	0	0	0	0	0	0	0
PD18017a	470	143	0	0	1493	0	0	0	0	0	0	0	0	0	0	0	0	0	0	0	0	0	0	0	0	0	0	0	0	0
PD18020a	0	0	13384	0	0	0	0	0	0	0	0	0	4387	0	0	0	0	0	0	0	0	0	0	0	0	0	0	0	0	0
PD18022a	526	93	0	0	0	0	0	588	0	0	0	0	124	0	0	269	0	0	0	0	0	0	0	0	0	0	0	0	0	0
PD18024a	0	0	7401	0	0	0	0	3161	0	0	0	0	540	0	0	0	0	0	0	0	0	0	0	0	0	0	0	0	0	0
PD18031a	704	91	0	0	1743	0	0	0	0	0	0	0	229	0	0	0	0	0	0	0	0	0	0	0	0	0	0	0	0	0
PD18037a	2935	234	2800	0	0	0	0	0	0	0	0	0	0	0	0	0	0	0	0	0	0	0	0	0	0	0	0	0	0	0
PD18045a	0	3754	6937	0	0	0	0	0	0	0	0	0	8776	0	0	0	0	0	0	0	0	0	0	0	0	0	0	0	0	0
PD18046a	915	215	0	0	1770	0	0	0	0	0	0	0	0	0	0	0	0	0	0	0	0	0	0	0	0	0	0	0	0	0
PD18047a	918	179	0	0	1246	0	0	0	0	0	0	0	0	0	0	0	0	0	0	0	0	0	0	0	0	0	0	0	0	0
PD18048a	1232	0	0	0	3243	0	0	0	0	0	0	0	310	0	0	0	0	0	0	0	0	0	0	0	0	0	0	0	0	0
PD18049a	1001	413	0	0	0	0	0	0	0	0	0	0	214	0	0	1763	0	0	0	0	0	0	0	0	0	0	0	0	0	0
PD18050a	1529	338	0	0	0	0	0	1417	0	0	0	0	280	0	0	0	0	0	0	0	0	0	0	0	0	0	0	0	0	0
PD18100a	453	153	0	0	473	0	0	451	0	0	0	0	0	0	0	0	0	0	0	0	0	0	0	0	0	0	0	0	0	0
PD18101a	312	0	0	0	550	0	0	0	0	0	0	0	0	0	0	0	0	0	0	0	0	0	0	0	0	0	0	0	0	0
PD18116a	442	147	0	0	953	0	0	0	0	0	0	0	0	0	0	0	0	0	0	0	0	0	0	0	0	0	0	0	0	0
PD18149a	540	0	0	0	1901	0	0	0	0	0	0	0	128	0	0	0	0	0	0	0	0	0	0	0	0	0	0	0	0	0
PD18188a	614	134	0	0	1487	0	0	0	0	0	0	0	0	0	0	0	0	0	0	0	0	0	0	0	0	0	0	0	0	0
PD18189a	646	497	0	0	1447	0	0	1405	0	0	0	0	274	0	0	0	0	0	0	0	0	0	0	0	0	0	0	0	0	0
PD18247a	0	3589	0	0	0	0	0	0	0	0	0	0	5546	0	0	0	0	0	0	0	0	0	0	0	0	0	0	0	0	0
PD18251a	628	136	1253	0	1468	0	0	0	0	0	0	0	0	0	0	0	0	0	0	0	0	0	0	0	0	0	0	0	0	0
PD18257a	545	343	0	0	0	0	0	1646	0	0	0	0	437	0	0	0	0	0	0	0	0	0	0	0	0	0	0	0	0	0
PD18258a	408	0	0	0	432	0	0	300	0	0	0	0	0	0	0	0	0	0	0	0	0	0	0	0	0	0	0	0	0	0
PD18259a	1144	424	1974	0	0	0	0	2575	0	0	0	0	519	0	0	0	0	0	0	0	0	0	0	0	0	0	0	0	0	0
PD18264a	0	5017	0	0	0	0	0	0	0	0	0	0	1662	0	0	0	0	0	0	0	0	0	0	0	0	0	0	0	0	0
PD18269a	380	0	0	0	0	0	0	354	0	0	0	0	0	0	0	462	0	0	0	0	0	0	0	0	0	0	0	0	0	189
PD18728a	434	192	0	0	0	0	0	423	0	0	0	0	0	0	0	719	0	0	0	0	0	0	0	0	0	0	0	0	0	0
PD18730a	368	481	0	0	0	0	0	0	0	0	0	0	549	0	0	501	0	0	0	0	0	0	0	0	0	0	0	0	0	0
PD18733a	589	273	0	0	1391	0	0	764	0	0	0	0	0	0	0	0	0	0	0	0	0	0	0	0	0	0	0	0	0	0
PD18734a	1083	227	0	0	972	0	0	1544	0	0	0	0	0	0	0	0	0	0	0	0	0	0	0	0	0	0	0	0	0	0
PD18748a	925	746	0	0	1285	0	0	0	0	0	0	0	0	0	0	0	0	0	0	0	0	0	0	0	0	0	0	0	0	0
PD18749a	0	929	0	0	0	0	0	0	0	0	0	0	3731	0	0	0	0	0	0	0	0	0	0	0	0	0	0	0	0	0
PD18751a	704	94	0	0	1108	0	0	0	0	0	0	0	0	0	0	0	0	0	0	0	0	0	0	0	0	0	0	0	0	0
PD18754a	625	882	0	0	0	0	0	807	0	0	0	0	277	0	0	0	0	0	0	0	0	0	0	0	0	0	0	0	0	0
PD18756a	658	87	0	0	888	0	0	0	0	0	0	0	0	0	0	0	0	0	0	0	0	0	0	0	0	0	0	0	0	0
PD18768a	661	127	0	0	1767	0	0	0	0	0	0	0	0	0	0	0	0	0	0	0	0	0	0	0	0	0	0	0	0	0
PD18769a	0	489	0	0	1177	0	0	0	0	0	0	0	1314	0	0	0	0	0	0	0	0	0	0	0	0	0	0	0	0	0
PD18771a	594	0	0	0	1181	0	0	0	0	0	0	0	0	0	0	0	0	0	0	0	0	0	0	0	0	0	0	0	0	0
PD18775a	483	64	0	0	0	0	0	301	0	0	0	0	0	0	0	479	0	0	0	0	0	0	0	0	0	0	0	0	0	0
PD18776a	611	0	0	0	0	0	0	276	0	0	0	0	0	0	0	741	0	0	0	0	0	0	0	0	0	0	0	0	0	0
PD22036a	269	0	0	0	777	0	0	0	0	0	0	0	0	0	0	0	0	0	0	0	0	0	0	0	0	0	0	0	0	0
PD22251a	582	0	0	0	922	0	0	0	0	0	0	0	0	0	0	0	0	0	0	0	0	0	0	0	0	0	0	0	0	0
PD22355a	1231	0	5334	0	0	0	0	3195	0	0	0	0	0	0	0	0	0	0	0	0	0	0	0	0	0	0	0	0	0	0
PD22357a	0	2295	0	0	2854	0	0	0	0	0	0	0	2569	0	0	0	0	0	0	0	0	0	0	0	0	0	0	0	0	0
PD22358a	0	0	5239	0	0	0	0	0	0	0	0	0	918	0	0	0	0	0	0	0	0	0	0	0	0	0	0	0	0	0
PD22359a	486	221	0	0	1108	0	0	0	0	0	0	0	0	0	0	0	0	0	0	0	0	0	0	0	0	0	0	0	0	0
PD22360a	0	0	5575	0	0	0	0	2195	0	0	0	0	739	0	0	0	0	0	0	0	0	0	0	0	0	0	0	0	0	0
PD22361a	0	1394	0	0	0	0	0	2422	0	0	0	0	2082	0	0	0	0	0	0	0	0	0	0	0	0	0	0	0	0	0
PD22362a	278	398	0	0	0	0	0	1060	0	0	210	0	0	0	0	0	0	0	0	0	0	0	0	0	0	0	0	0	0	0
PD22363a	0	0	5480	0	0	556	0	2867	0	0	0	0	0	0	0	0	0	0	0	0	0	0	0	0	0	0	0	0	0	0
PD22364a	821	473	0	0	793	0	0	0	0	0	0	0	312	0	0	0	0	0	0	0	0	0	0	0	0	0	0	0	0	0
PD22365a	277	0	0	0	889	0	0	738	0	0	0	0	0	0	0	0	0	0	0	0	0	0	0	0	0	0	0	0	0	0
PD22366a	0	0	4346	0	3891	0	0	0	0	0	0	0	1570	0	0	0	0	0	0	0	0	0	0	0	0	0	0	0	0	0
PD23550a	743	460	0	0	0	0	0	0	0	0	312	0	0	0	0	1350	0	0	0	0	0	0	0	0	0	0	0	0	0	0
PD23554a	0	0	4080	0	0	0	0	2385	0	0	0	0	432	0	0	0	0	0	0	0	0	0	0	0	0	0	0	0	0	0
PD23558a	715	384	5567	0	0	0	0	2897	0	0	0	0	568	0	0	0	0	0	0	0	0	0	0	0	0	0	0	0	0	0
PD23559a	628	0	0	0	2943	0	0	1174	0	0	0	0	634	0	0	0	0	0	0	0	0	0	0	0	0	0	0	0	0	0
PD23560a	477	215	0	0	1937	0	0	0	0	0	0	0	375	0	0	0	0	0	0	0	0	0	0	0	0	0	0	0	0	0
PD23562a	697	0	6053	0	0	0	0	0	0	0	0	0	597	0	0	0	0	0	0	0	0	0	0	0	0	0	0	0	0	0
PD23563a	0	0	4371	0	0	0	0	3851	0	0	0	0	0	0	0	0	0	0	0	0	0	0	0	0	0	0	0	0	0	0
PD23565a	0	2614	0	0	0	0	0	3804	0	0	0	0	2432	0	0	0	0	0	0	0	0	0	0	0	0	0	0	0	0	0
PD23566a	555	0	4246	0	0	0	0	1864	0	0	0	0	0	0	0	0	0	0	0	0	0	0	0	0	0	0	0	0	0	0
PD23567a	680	0	3973	0	0	0	0	2544	0	0	0	0	0	0	0	0	0	0	0	0	0	0	0	0	0	0	0	0	0	0
PD23569a	101	0	270	0	0	0	0	249	0	0	0	0	52	0	0	293	0	0	0	0	0	0	0	0	0	0	0	0	0	87
PD23570a	419	632	0	0	898	0	0	0	0	0	0	0	295	0	0	0	0	0	0	0	0	0	0	0	0	0	0	0	0	0
PD23574a	0	0	10676	0	0	0	0	0	0	0	0	0	2417	0	0	0	0	0	0	0	0	0	0	0	0	0	0	0	0	0
PD23577a	407	0	2378	0	1184	0	0	0	0	0	0	0	0	0	0	0	0	0	0	0	0	0	0	0	0	0	0	0	0	0
PD23578a	0	0	3930	0	0	0	0	2664	0	0	0	0	244	0	0	0	0	0	0	0	0	0	0	0	0	0	0	0	0	0
PD24182a	0	0	3793	0	3546	0	0	0	0	0	0	0	2197	0	0	0	0	0	0	0	0	0	0	0	0	0	0	0	0	0
PD24186a	0	0	3843	0	0	0	0	1587	0	0	0	0	0	0	0	2057	0	0	0	0	0	0	0	0	0	0	0	0	0	0
PD24190a	0	0	0	0	3811	0	0	3341	0	0	0	0	692	0	0	0	1962	0	0	0	0	0	0	0	0	0	0	0	0	0
PD24191a	476	0	4762	0	0	0	0	0	0	0	0	0	0	0	0	881	0	0	0	0	0	0	0	0	0	0	0	0	0	0
PD24192a	0	0	12179	0	0	0	0	0	0	0	0	0	1913	0	0	3733	0	0	0	0	0	0	0	0	0	0	0	0	0	0
PD24194a	0	5316	0	0	0	0	0	0	0	0	0	0	8378	0	0	0	0	0	0	0	0	0	0	0	0	0	0	0	0	0
PD24195a	469	99	0	0	1671	0	0	0	0	0	0	0	0	0	0	0	0	0	0	0	0	0	0	0	0	0	0	0	0	0
PD24196a	347	110	0	0	1143	0	0	767	0	0	0	0	250	0	0	0	0	0	0	0	0	0	0	0	0	0	0	0	0	0
PD24197a	0	0	10574	0	0	0	0	9640	0	0	0	0	0	0	0	0	0	0	0	0	0	0	0	0	0	0	0	0	0	0
PD24199a	556	137	999	0	964	0	0	0	0	0	0	0	196	0	0	0	0	0	0	0	0	0	0	0	0	0	0	0	0	0
PD24200a	0	0	712	0	0	0	0	261	0	0	0	0	0	0	0	0	0	0	0	0	0	0	0	0	0	0	0	0	0	0
PD24201a	1742	0	5520	0	0	0	0	9084	2871	0	0	0	1259	0	0	0	0	0	0	0	0	0	0	0	0	0	0	0	0	0
PD24202a	819	0	6081	0	0	0	0	0	0	0	0	0	877	0	0	0	0	0	0	0	0	0	0	0	0	0	0	0	0	0
PD24204a	1449	0	0	0	1345	0	0	0	0	0	0	0	0	0	0	0	0	0	0	0	0	0	0	0	0	0	0	0	0	0
PD24205a	0	0	3068	0	2737	0	0	2687	0	0	0	0	434	0	0	0	0	0	0	0	0	0	0	0	0	0	0	0	0	0
PD24206a	0	293	0	0	1933	0	0	1169	0	0	0	0	213	0	0	0	0	0	0	0	0	0	0	0	0	0	0	0	0	0
PD24207a	1136	1227	0	0	0	0	0	0	0	0	0	0	1013	0	0	1367	0	0	0	0	0	0	0	0	0	0	0	0	0	0
PD24208a	0	15710	0	0	0	0	0	0	0	0	0	0	9913	0	0	0	0	0	0	0	0	0	0	0	0	0	0	0	0	0
PD24209a	0	1945	0	0	0	0	0	0	0	0	0	0	8223	0	0	0	0	0	0	0	0	0	0	0	0	0	0	0	0	0
PD24212a	0	399	3552	0	0	0	0	4948	0	0	704	0	450	0	0	0	0	0	0	0	0	0	0	0	0	0	0	0	0	0
PD24214a	1272	0	0	0	1364	0	0	0	0	0	0	0	0	0	0	0	0	442	0	0	0	0	0	0	0	0	0	0	0	0
PD24215a	0	0	1835	0	0	0	0	2039	1765	0	0	0	536	0	0	0	0	0	0	0	0	0	0	0	0	0	0	0	0	0
PD24216a	0	2764	0	0	0	0	0	0	0	0	0	0	2583	0	0	3991	0	0	0	0	0	0	0	0	0	0	0	0	0	0
PD24217a	0	4123	0	0	0	0	0	0	0	0	0	0	11181	0	0	0	0	0	0	0	0	0	0	0	0	0	0	0	0	0
PD24218a	462	171	0	0	2654	0	0	0	0	0	0	0	0	0	0	0	0	0	0	0	0	0	0	0	0	0	0	0	0	0
PD24219a	1724	0	0	0	0	0	0	0	0	0	0	0	0	0	0	1594	0	0	0	0	0	0	0	0	0	0	0	0	0	0
PD24220a	1244	232	0	0	0	0	0	1399	0	0	0	0	734	0	0	0	0	0	0	0	0	0	0	0	0	0	0	0	0	0
PD24221a	206	0	0	0	0	0	0	1136	364	0	0	0	118	0	0	466	0	0	0	0	0	0	0	0	0	0	0	0	0	0
PD24223a	870	944	0	0	1613	0	0	0	0	0	0	0	0	0	0	0	0	0	0	0	0	0	0	0	0	0	0	0	0	0
PD24224a	483	124	0	0	1476	0	0	0	0	0	0	0	126	0	0	0	0	0	0	0	0	0	0	0	0	0	0	0	0	0
PD24225a	313	357	0	0	0	0	0	939	0	0	0	0	210	0	0	0	0	0	0	0	0	0	0	0	0	0	0	0	0	0
PD24302a	397	86	0	0	783	0	0	0	0	0	0	0	0	0	0	0	0	0	0	0	0	0	0	0	0	0	0	0	0	0
PD24303a	0	0	3844	0	0	0	0	0	0	0	0	0	655	0	0	0	0	0	0	0	0	0	0	0	0	0	0	0	0	0
PD24304a	0	0	3236	0	0	0	0	3616	0	0	0	0	0	0	0	0	0	0	0	0	0	0	0	0	0	0	0	0	0	0
PD24306a	0	0	1822	0	0	0	0	1327	0	0	0	0	185	0	0	0	0	0	0	0	0	0	0	0	0	0	0	0	0	0
PD24307a	354	91	0	0	1147	0	0	0	0	0	0	0	0	0	0	0	0	0	0	0	0	0	0	0	0	0	0	0	0	0
PD24308a	885	0	2172	0	0	0	0	0	0	0	0	0	0	0	0	1693	0	0	0	0	0	0	0	0	0	0	0	0	0	0
PD24314a	795	0	0	0	1705	0	0	1144	0	0	0	0	224	0	0	0	0	0	0	0	0	0	0	0	0	0	0	0	0	0
PD24318a	657	0	0	0	1888	0	0	0	0	0	0	0	0	0	0	0	0	0	0	0	0	0	0	0	0	0	0	0	0	0
PD24322a	933	591	0	0	2439	0	0	0	0	0	0	0	903	0	0	0	0	0	0	0	0	0	0	0	0	0	0	0	0	0
PD24325a	1282	0	4497	0	3246	0	0	0	0	0	0	0	1360	0	0	0	0	0	0	0	0	0	0	0	0	0	0	0	0	0
PD24326a	0	11636	0	0	0	0	0	0	0	0	0	0	11983	0	0	0	0	0	0	0	0	0	0	0	0	0	0	0	0	0
PD24327a	0	5955	0	0	0	0	0	0	0	0	0	0	10229	0	0	0	0	0	0	0	0	0	0	0	0	0	0	0	0	0
PD24329a	985	186	0	0	0	0	0	939	0	0	0	0	0	0	0	0	0	0	0	0	0	0	0	0	0	0	0	0	0	0
PD24332a	783	177	0	0	0	0	0	959	0	0	0	0	0	0	0	0	0	0	0	0	0	0	0	0	0	0	0	0	0	0
PD24333a	0	0	0	0	0	0	0	0	0	0	0	0	0	0	0	0	22884	0	0	0	0	0	0	0	0	0	0	0	0	0
PD24335a	1523	188	0	0	0	0	0	1185	0	0	0	0	278	0	0	772	0	0	0	0	0	0	0	0	0	0	0	0	0	0
PD24336a	0	522	0	0	2020	0	0	795	0	0	0	0	0	0	0	0	0	0	0	0	0	0	0	0	0	0	0	0	0	0
PD24337a	459	0	3590	0	0	0	0	1346	0	0	0	0	310	0	0	0	0	0	0	0	0	0	0	0	0	0	0	0	0	0
PD3851a	416	0	0	0	0	0	0	828	0	0	0	0	0	0	0	306	0	0	0	0	0	0	0	0	0	0	0	0	0	267
PD3890a	558	0	4247	0	0	0	0	0	0	0	0	0	777	0	0	0	0	0	0	0	0	0	0	0	0	0	0	0	0	0
PD3904a	0	286	2793	0	0	0	0	1564	0	0	543	0	479	0	0	0	0	0	0	0	0	0	0	0	0	0	0	0	0	0
PD3905a	0	191	2761	0	0	0	0	1129	0	0	0	0	521	0	0	0	0	0	0	0	0	0	0	0	0	0	0	0	0	0
PD3945a	0	0	3439	0	3262	0	0	3178	0	0	0	0	669	0	0	0	0	0	0	0	0	0	0	0	0	0	0	0	0	0
PD3989a	705	293	0	0	1239	0	0	0	0	0	0	0	0	0	0	0	0	0	0	0	0	0	0	0	0	0	0	0	0	0
PD4005a	0	685	3806	0	0	0	0	0	0	0	0	0	1549	0	0	0	0	0	0	0	0	0	0	0	0	0	0	0	0	0
PD4006a	0	0	6780	0	0	0	0	2794	0	0	0	0	0	0	0	0	0	0	0	0	0	0	0	0	0	0	0	0	0	0
PD4069a	733	84	0	0	0	0	0	950	0	0	0	0	0	0	317	0	0	0	0	0	0	0	0	0	0	0	0	0	0	0
PD4072a	0	13773	0	0	0	0	0	0	0	0	0	0	14157	0	0	0	0	0	0	0	0	0	0	0	0	0	0	0	0	0
PD4076a	740	246	0	0	1103	0	0	0	0	0	0	0	0	0	0	0	0	0	0	0	0	0	0	0	0	0	0	0	0	0
PD4085a	618	160	0	0	1050	0	0	874	0	0	0	0	0	0	0	0	0	0	0	0	0	0	0	0	0	0	0	0	0	0
PD4086a	350	202	983	0	0	0	0	0	0	0	0	0	414	0	0	0	0	0	0	0	0	0	0	0	0	0	0	0	0	0
PD4088a	581	88	736	0	0	0	0	0	0	0	0	0	0	0	0	0	0	284	0	0	0	0	0	0	0	0	0	0	0	0
PD4103a	1182	625	0	0	0	0	0	2495	0	0	337	0	576	0	0	0	0	0	0	0	0	0	0	0	0	0	0	0	0	0
PD4107a	0	894	6031	0	0	0	0	2948	0	0	0	0	0	0	0	0	0	0	0	0	0	0	0	0	0	0	0	0	0	0
PD4109a	1715	452	0	0	6367	0	0	0	0	0	0	0	1776	0	0	0	0	0	0	0	0	0	0	0	0	0	0	0	0	0
PD4115a	0	0	3630	0	3092	0	0	2645	0	0	0	0	383	0	0	0	0	0	0	0	0	0	0	0	0	0	0	0	0	0
PD4116a	0	286	4328	0	0	0	0	2739	0	0	0	0	815	0	0	0	0	0	0	0	0	0	0	0	0	0	0	0	0	0
PD4192a	613	194	2929	0	0	0	0	0	0	0	0	0	554	0	0	0	0	0	0	0	0	0	0	0	0	0	0	0	0	0
PD4194a	428	113	0	0	687	0	0	0	0	0	0	0	199	0	0	0	0	0	0	0	0	0	0	0	0	0	0	0	0	0
PD4198a	1040	571	0	0	2632	0	0	0	0	0	0	0	272	0	0	0	0	0	0	0	0	0	0	0	0	0	0	0	0	0
PD4199a	0	2774	0	0	0	0	0	0	0	0	0	0	4173	0	0	0	0	0	0	0	0	0	0	0	0	0	0	0	0	0
PD4225a	958	141	0	0	855	0	0	0	0	0	0	0	0	0	0	0	0	0	0	0	0	0	0	0	0	0	0	0	0	0
PD4248a	320	97	0	0	1640	0	0	0	0	0	0	0	136	0	0	0	0	0	0	0	0	0	0	0	0	0	0	0	0	0
PD4252a	951	0	0	0	2283	0	0	0	0	0	0	0	161	0	0	0	0	376	0	0	0	0	0	0	0	0	0	0	0	0
PD4255a	775	0	0	0	2687	0	0	0	0	0	0	0	215	0	0	0	0	875	0	0	0	0	0	0	0	0	0	0	0	0
PD4261a	491	0	0	0	1304	0	0	0	0	0	0	0	0	0	0	0	0	0	0	0	0	0	0	0	0	0	0	0	0	0
PD4264a	944	255	0	0	917	0	0	0	0	0	0	0	0	0	0	0	0	0	0	0	0	0	0	0	0	0	0	0	0	0
PD4266a	477	816	0	0	0	0	0	0	0	0	0	0	370	0	0	723	0	0	0	0	0	0	0	0	0	0	0	0	0	0
PD4267a	683	0	0	0	963	0	0	0	0	0	0	0	472	0	0	0	0	0	0	0	0	0	0	0	0	0	0	0	0	0
PD4315a	717	600	0	0	0	0	0	1578	0	0	0	0	490	0	0	0	0	0	0	0	0	0	0	0	0	0	0	0	0	0
PD4604a	0	0	4885	0	0	0	0	3169	0	0	608	0	658	0	0	0	0	0	0	0	0	0	0	0	0	0	0	0	0	0
PD4605a	1253	0	0	0	0	0	0	0	0	0	0	0	231	0	0	1165	0	0	0	0	0	0	0	0	0	0	0	0	0	0
PD4606a	415	0	0	0	0	0	0	0	0	0	84	0	0	0	0	629	0	0	0	0	0	0	0	0	0	0	0	0	0	0
PD4607a	0	16351	0	0	0	0	0	0	0	0	0	0	9601	0	0	0	0	0	0	0	0	0	0	0	0	0	0	0	0	0
PD4613a	0	635	0	0	1035	0	0	0	0	0	0	0	523	0	0	0	0	0	0	0	0	0	0	0	0	0	0	0	0	0
PD4826a	645	577	0	0	1989	0	0	0	0	0	0	0	605	0	0	0	0	0	0	0	0	0	0	0	0	0	0	0	0	0
PD4833a	675	0	5235	0	0	0	0	0	0	0	0	0	489	0	0	0	0	0	0	0	0	0	0	0	0	0	0	0	0	0
PD4836a	755	0	1733	0	1518	0	0	0	0	0	0	0	295	0	0	0	0	0	0	0	0	0	0	0	0	0	0	0	0	0
PD4841a	578	0	3938	0	2206	0	0	0	0	0	0	0	296	0	0	0	0	0	0	0	0	0	0	0	0	0	0	0	0	0
PD4844a	0	0	8118	0	3730	0	0	0	0	0	0	0	961	0	0	0	0	0	0	0	0	0	0	0	0	0	0	0	0	0
PD4845a	622	0	3086	0	0	0	0	1439	0	0	0	0	0	0	0	0	586	0	0	0	0	0	0	0	0	0	0	0	0	0
PD4847a	1134	0	0	0	4565	0	0	3430	1911	0	0	0	0	0	0	0	0	0	0	0	0	0	0	0	0	0	0	0	0	0
PD4872a	0	0	0	0	0	0	0	3509	0	0	0	0	1300	0	0	0	0	0	0	0	0	0	0	0	0	0	0	0	0	0
PD4874a	0	740	0	0	4119	0	0	2560	0	0	0	0	2288	0	0	0	0	0	0	0	0	0	0	0	0	0	0	0	0	0
PD4875a	743	0	3710	0	2068	0	0	0	0	0	0	0	282	0	0	0	0	0	0	0	0	0	0	0	0	0	0	0	0	0
PD4876a	0	206	3132	0	1111	0	0	0	0	0	0	0	457	0	0	0	0	0	0	0	0	0	0	0	0	0	0	0	0	0
PD4951a	245	0	1510	0	779	0	0	0	0	0	0	0	242	0	0	0	0	0	0	0	0	0	0	0	0	0	0	0	0	0
PD4952a	1088	515	6359	0	0	0	0	3137	0	0	0	0	932	0	0	0	0	0	0	0	0	0	0	0	0	0	0	0	0	0
PD4953a	0	0	2560	0	2251	0	0	1723	0	0	0	0	409	0	0	0	0	0	0	0	0	0	0	0	0	0	0	0	0	0
PD4954a	542	0	4315	0	0	0	0	0	0	0	0	0	464	0	0	0	0	0	0	0	0	0	0	0	0	0	0	0	0	441
PD4955a	0	0	2185	0	0	0	0	2566	0	0	0	0	356	0	0	0	0	0	0	0	0	0	0	0	0	0	0	0	0	961
PD4956a	0	0	10059	0	0	0	0	0	0	0	0	0	1522	0	0	0	0	0	0	0	0	0	0	0	0	0	0	0	0	0
PD4957a	354	180	1684	0	0	0	0	799	0	0	0	0	259	0	0	0	0	0	0	0	0	0	0	0	0	0	0	0	0	0
PD4958a	0	529	0	0	4817	0	0	3248	0	0	0	0	742	0	0	0	0	0	0	0	0	0	0	0	0	0	0	0	0	0
PD4959a	565	0	2239	0	0	0	0	1428	0	0	0	0	0	0	0	0	0	0	0	0	0	0	0	0	0	0	0	0	0	377
PD4962a	0	1530	0	0	0	0	0	2785	0	0	0	0	2526	0	0	0	0	0	0	0	0	0	0	0	0	0	0	0	0	0
PD4965a	838	139	0	0	1727	0	0	0	0	0	0	0	0	0	0	0	0	0	0	0	0	0	0	0	0	0	0	0	0	0
PD4967a	0	553	0	0	1829	0	0	0	0	0	0	0	844	0	0	0	0	0	0	0	0	0	0	0	0	0	0	0	0	0
PD4968a	1372	1085	0	0	0	0	0	2322	0	0	0	0	0	0	0	0	0	0	0	0	0	0	0	0	0	0	0	0	0	0
PD4969a	288	39	0	0	703	0	0	0	0	0	0	0	0	0	0	0	0	0	0	0	0	0	0	0	0	0	0	0	0	0
PD4970a	774	225	0	0	1409	0	0	0	0	0	0	0	0	0	0	0	0	0	0	0	0	0	0	0	0	0	0	0	0	0
PD4971a	1006	107	0	0	0	0	0	1150	0	0	0	0	0	0	0	500	0	0	0	0	0	0	0	0	0	0	0	0	0	0
PD4972a	366	0	0	0	778	0	0	0	0	0	0	0	0	0	0	0	0	0	0	0	0	0	0	0	0	0	0	0	0	0
PD4975a	679	0	6826	0	0	0	0	0	0	0	0	0	0	0	0	0	0	0	0	0	0	0	0	0	0	0	0	0	0	0
PD4976a	2211	0	0	0	0	0	0	1667	0	0	0	0	470	0	0	1926	0	0	0	0	0	0	0	0	0	0	0	0	0	0
PD4977a	0	24238	0	0	0	0	0	0	0	0	0	0	18019	0	0	0	0	0	0	0	0	0	0	0	0	0	0	0	0	0
PD4978a	658	563	0	0	0	0	0	1872	0	0	0	0	641	0	0	0	0	0	0	0	0	0	0	0	0	0	0	0	0	0
PD4980a	696	0	0	0	1417	0	0	1454	0	0	0	0	228	0	0	0	0	0	0	0	0	0	0	0	0	0	0	0	0	0
PD4981a	648	0	0	0	0	0	0	819	0	0	0	0	0	0	0	0	0	0	0	0	0	0	0	0	0	0	0	0	0	195
PD4982a	699	0	0	0	0	0	0	263	0	0	0	0	0	0	0	511	0	0	0	0	0	0	0	0	0	0	0	0	0	0
PD4983a	455	0	0	0	1307	0	0	0	0	0	0	0	0	0	0	0	0	0	0	0	0	0	0	0	0	0	0	0	0	0
PD4985a	575	103	0	0	1324	0	0	0	0	0	0	0	0	0	0	0	0	0	0	0	0	0	0	0	0	0	0	0	0	0
PD4986a	414	0	0	0	1561	0	0	0	0	0	0	0	0	0	0	0	0	0	0	0	0	0	0	0	0	0	0	0	0	0
PD5925a	0	0	3717	0	3833	0	0	0	0	0	0	0	1228	0	0	0	0	0	0	0	0	0	0	0	0	0	0	0	0	0
PD5928a	797	221	3821	0	0	0	0	2273	0	0	0	0	0	0	0	0	0	0	0	0	0	0	0	0	0	0	0	0	0	0
PD5930a	380	0	3088	0	0	0	0	0	0	0	0	0	477	0	0	0	0	0	0	0	0	0	0	0	0	0	0	0	0	0
PD5932a	0	0	8300	0	0	0	0	0	0	0	0	0	1759	0	0	0	0	0	0	0	0	0	0	0	0	0	0	0	0	0
PD5934a	0	0	8333	0	0	0	0	3245	0	0	0	0	0	0	0	0	0	0	0	0	0	0	0	0	0	0	0	0	0	0
PD5935a	986	0	7463	0	0	0	0	0	0	0	0	0	1220	0	0	0	0	0	0	0	0	0	0	0	0	0	0	0	0	0
PD5936a	768	221	0	0	1791	0	0	0	0	0	0	0	0	0	0	0	0	0	0	0	0	0	0	0	0	0	0	0	0	0
PD5942a	1427	0	2305	0	1859	0	0	0	0	0	0	0	398	0	0	0	0	0	0	0	0	0	0	0	0	0	0	0	0	0
PD5944a	711	170	0	0	1727	0	0	0	0	0	0	0	0	0	0	0	0	0	0	0	0	0	0	0	0	0	0	0	0	0
PD5945a	0	0	5701	0	0	0	0	2675	0	0	0	0	456	0	0	0	0	0	0	0	0	0	0	0	0	0	0	0	0	0
PD5946a	1231	0	0	0	2034	0	0	0	0	0	0	0	302	0	0	0	0	343	0	0	0	0	0	0	0	0	0	0	0	0
PD5947a	484	156	0	0	926	0	0	0	0	0	0	0	211	0	0	0	0	0	0	0	0	0	0	0	0	0	0	0	0	0
PD5948a	0	0	13165	0	0	0	0	0	0	0	0	0	0	0	0	0	0	0	0	0	0	0	0	0	0	2006	0	0	0	0
PD5950a	940	0	0	0	1037	0	0	0	0	0	0	0	0	0	0	0	0	211	0	0	0	0	0	0	0	0	0	0	0	0
PD5951a	1526	282	0	0	1383	0	0	0	0	0	0	0	0	0	0	0	0	0	0	0	0	0	0	0	0	0	0	0	0	0
PD5953a	837	0	744	0	0	0	0	0	0	0	0	0	0	0	0	554	0	0	0	0	0	0	0	0	0	0	0	0	0	0
PD5956a	771	132	0	0	0	0	0	2725	0	0	0	0	0	0	0	0	0	0	0	0	0	0	0	0	0	0	0	0	0	455
PD5959a	619	217	747	0	0	0	145	0	0	0	0	0	0	0	0	774	0	0	0	0	0	0	0	0	0	0	0	0	0	0
PD5960a	416	0	0	0	2192	0	201	1034	0	0	0	0	199	0	0	0	0	0	0	0	0	0	0	0	0	0	0	0	0	0
PD5961a	853	227	0	0	0	0	249	982	0	0	0	0	0	0	0	0	0	0	0	0	0	0	0	0	0	0	0	0	0	0
PD5964a	303	55	0	0	0	0	56	837	270	0	0	0	66	0	0	0	0	0	0	0	0	0	0	0	0	0	0	0	0	0
PD6016a2	555	396	752	0	0	0	0	0	0	0	0	0	206	0	0	0	0	0	0	0	0	0	0	0	0	0	0	0	0	0
PD6041a	524	0	0	0	1246	0	0	0	0	0	0	0	0	0	0	0	0	0	0	0	0	0	0	0	0	0	0	0	0	0
PD6042a	0	548	0	0	3754	0	0	1724	0	0	0	0	1091	0	0	0	0	0	0	0	0	0	0	0	0	0	0	0	0	0
PD6043a	0	6640	0	0	0	0	0	8802	0	0	0	0	7321	0	0	0	0	0	0	0	0	0	0	0	0	0	0	0	0	0
PD6044a	696	0	0	0	1733	0	0	0	0	0	0	0	142	0	0	0	0	0	0	0	0	0	0	0	0	0	0	0	0	0
PD6045a	356	546	0	0	1241	0	0	0	0	0	0	0	187	0	0	0	0	0	0	0	0	0	0	0	0	0	0	0	0	0
PD6046a	772	0	0	0	818	0	236	1044	0	0	0	0	104	0	0	0	0	0	0	0	0	0	0	0	0	0	0	0	0	0
PD6047a	2126	742	0	0	5690	0	0	0	0	0	0	0	0	0	0	0	0	882	0	0	0	0	0	0	0	0	0	0	0	0
PD6048a	994	118	0	0	0	0	0	1544	0	0	250	0	194	0	0	0	0	0	0	0	0	0	0	0	0	0	0	0	0	0
PD6404a	773	293	2913	0	2046	0	0	0	0	0	0	0	526	0	0	0	0	0	0	0	0	0	0	0	0	0	0	0	0	0
PD6405a	0	6186	0	0	0	0	0	0	0	0	0	0	29130	0	0	0	0	0	0	0	0	0	0	0	0	0	0	0	0	0
PD6406a	361	0	4322	0	0	0	0	0	0	0	0	0	341	0	0	0	0	0	0	0	0	0	0	0	0	0	0	0	0	0
PD6409a	0	0	4576	0	0	0	0	3137	0	0	0	0	1096	0	0	0	0	0	0	0	0	0	0	0	0	0	0	0	0	0
PD6410a	617	0	5898	0	0	0	0	0	0	0	0	0	797	0	0	0	0	0	0	0	0	0	0	0	0	0	0	0	0	0
PD6411a	412	0	5517	0	0	0	0	0	0	0	0	0	744	0	0	0	0	0	0	0	0	0	0	0	0	0	0	0	0	0
PD6413a	0	239	2310	0	0	0	0	1401	0	0	0	0	635	0	0	0	0	0	0	0	0	0	0	0	0	0	0	0	0	0
PD6414a	387	157	0	0	1216	0	0	0	0	0	0	0	0	0	0	0	0	0	0	0	0	0	0	0	0	0	0	0	0	0
PD6415a	0	484	3313	0	4157	0	0	0	0	0	0	0	1589	0	0	0	0	0	0	0	0	0	0	0	0	0	0	0	0	0
PD6416a	0	0	1430	0	0	0	0	1137	0	0	0	0	437	0	0	0	324	0	0	0	0	0	0	0	0	0	0	0	0	0
PD6417a	794	0	751	0	0	0	0	0	0	0	0	0	0	0	0	0	0	0	0	0	0	0	0	0	0	0	0	0	0	0
PD6418a	612	0	0	0	1407	0	0	0	0	0	0	0	0	0	0	0	0	0	0	0	0	0	0	0	0	0	0	0	0	0
PD6422a	551	520	0	0	1834	0	0	1729	0	0	0	0	0	0	0	0	0	0	0	0	0	0	0	0	0	0	0	0	0	545
PD6466b	520	144	0	0	1144	0	0	0	0	0	0	0	0	0	0	0	0	0	0	0	0	0	0	0	0	0	0	0	0	0
PD6684a	0	0	11006	0	0	0	0	0	0	0	0	0	2670	0	0	0	0	0	0	0	0	0	0	0	0	0	0	0	0	0
PD6711a2	669	0	0	0	0	0	0	0	0	0	0	0	0	0	0	896	0	0	0	0	0	0	0	0	0	0	0	0	0	348
PD6719a	705	0	4265	0	0	0	0	0	0	0	0	0	0	0	0	0	0	0	0	0	0	0	0	0	0	0	0	0	0	0
PD6720a	585	164	0	0	1268	0	0	0	0	0	0	0	0	0	0	0	0	0	0	0	0	0	0	0	0	0	0	0	0	0
PD6721a	817	208	0	0	1205	0	0	0	0	0	0	0	0	0	0	0	0	0	0	0	0	0	0	0	0	0	0	0	0	0
PD6722a	0	2143	0	0	0	0	0	0	0	0	0	0	7966	0	0	0	0	0	0	0	0	0	0	0	0	0	0	0	0	0
PD6727b	1982	0	3599	0	0	0	0	0	0	0	0	0	1097	0	0	0	0	0	0	0	0	0	0	0	0	0	0	0	0	0
PD6728b	514	0	1256	0	0	0	0	657	0	0	0	0	149	0	0	0	0	0	0	0	0	0	0	0	0	0	0	0	0	0
PD6729a2	1096	0	2333	0	1442	0	0	0	0	0	0	0	0	0	0	0	0	0	0	0	0	0	0	0	0	0	0	0	0	0
PD6730b	670	0	7554	0	0	0	0	1864	0	0	0	0	0	0	0	0	0	0	0	0	0	0	0	0	0	0	0	0	0	0
PD6731a2	0	1082	4621	0	0	0	0	0	0	0	0	0	2844	0	0	0	0	0	0	0	0	0	0	0	0	0	0	0	0	0
PD6732b	565	0	886	0	0	0	0	0	0	0	0	0	468	0	0	994	0	0	0	0	0	0	0	0	0	0	0	0	0	0
PD6733b	1083	475	0	0	2429	0	0	0	0	0	0	0	688	0	0	0	0	0	0	0	0	0	0	0	0	0	0	0	0	0
PD7066a	649	0	2693	0	0	0	0	0	0	0	0	0	295	0	0	0	0	0	0	0	0	0	0	0	0	0	0	0	0	0
PD7067a	772	0	2155	0	1564	0	0	0	953	0	0	0	533	0	0	0	0	0	0	0	0	0	0	0	0	0	0	0	0	0
PD7069a	887	1006	0	0	0	0	0	1775	0	0	0	0	1461	0	0	0	0	0	0	0	0	0	0	0	0	0	0	0	0	0
PD7199a	472	0	0	0	657	0	0	0	0	0	0	0	0	0	0	0	0	0	0	0	0	0	0	0	0	0	0	0	0	0
PD7201a	547	101	0	0	935	0	0	0	0	0	0	0	0	0	0	0	0	0	0	0	0	0	0	0	0	0	0	0	0	0
PD7202a	1643	641	0	0	2179	0	0	0	0	0	0	0	0	0	0	0	0	676	0	0	0	0	0	0	0	0	0	0	0	0
PD7203a	215	183	0	0	662	0	0	0	0	0	0	0	317	0	0	0	0	184	0	0	0	0	0	0	0	0	0	0	0	0
PD7204a	696	175	0	0	1303	0	0	0	0	0	0	0	0	0	0	0	0	0	0	0	0	0	0	0	0	0	0	0	0	0
PD7205a	0	1011	0	0	4679	0	0	0	0	0	0	0	2166	0	0	0	0	0	0	0	0	0	0	0	0	0	0	0	0	0
PD7206a	877	0	0	0	2231	0	0	1364	0	0	0	0	266	0	0	0	0	0	0	0	0	0	0	0	0	0	0	0	0	0
PD7207a	1078	291	0	0	1172	0	311	0	0	0	0	0	0	0	0	0	0	0	0	0	0	0	0	0	0	0	0	0	0	0
PD7209a	686	0	0	0	0	0	0	0	0	0	0	0	0	0	0	530	0	153	0	0	0	0	0	0	0	0	0	0	0	294
PD7210a	512	0	0	0	806	0	0	0	0	0	0	0	0	0	0	0	0	0	0	0	0	0	0	0	0	0	0	0	0	0
PD7211a	810	0	5083	0	0	0	0	1991	0	0	0	0	400	0	0	0	0	0	0	0	0	0	0	0	0	0	0	0	0	0
PD7214a	457	87	0	0	0	0	0	0	0	0	123	0	0	0	0	824	0	0	0	0	0	0	0	0	0	0	0	0	0	0
PD7215a	557	910	3722	0	0	0	0	0	0	0	0	0	1193	0	0	0	0	0	0	0	0	0	0	0	0	0	0	0	0	0
PD7217a	697	703	6625	0	0	0	0	0	0	0	0	0	1143	0	0	0	0	0	0	0	0	0	0	0	0	0	0	0	0	0
PD7218a	556	0	0	0	594	0	0	0	0	0	0	0	0	0	0	0	0	0	0	0	0	0	0	0	0	0	0	0	322	0
PD7219a	0	4061	0	0	0	0	0	0	0	0	0	0	7559	0	0	0	0	0	0	0	0	0	0	0	0	0	0	0	0	0
PD7220a	931	391	0	0	1161	0	0	0	0	0	0	0	223	0	0	0	0	0	0	0	0	0	0	0	0	0	0	0	0	0
PD7221a	912	367	0	0	0	0	0	0	0	0	0	0	209	0	0	551	0	0	0	0	0	0	0	0	0	0	0	0	0	0
PD7238a	760	349	0	0	1106	0	0	0	0	0	0	0	0	0	0	0	0	0	0	0	0	0	0	0	0	0	0	0	0	0
PD7240a	1288	0	0	0	3643	0	0	0	0	0	0	0	256	0	0	0	0	0	0	0	0	0	0	0	0	0	0	0	0	0
PD7243a	1222	792	0	0	2548	0	0	1554	0	0	0	0	0	0	0	0	0	657	0	0	0	0	0	0	0	0	0	0	0	0
PD7248a	922	0	10651	0	0	0	0	0	0	0	0	0	1468	0	0	0	0	0	0	0	0	0	0	0	0	0	0	0	0	0
PD7249a	0	854	0	0	2839	0	0	0	0	0	0	0	889	0	0	0	0	0	0	0	0	0	0	0	0	0	0	0	0	0
PD7250a	682	0	7207	0	0	0	0	0	0	0	0	0	0	0	0	0	0	0	0	0	0	0	0	0	0	0	0	0	0	0
PD7304a	546	237	1219	0	0	0	0	0	0	0	0	0	0	0	0	0	0	0	0	0	0	0	0	0	0	0	0	0	0	0
PD7305a	1690	293	0	0	0	0	259	2027	0	0	0	0	485	0	0	0	0	0	0	0	0	0	0	0	0	0	0	0	0	0
PD7306a	1430	1003	0	0	0	0	0	2222	1656	0	0	0	549	0	0	0	0	0	0	0	0	0	0	0	0	0	0	0	0	0
PD7307a	0	2338	0	0	0	0	0	0	0	0	0	0	6085	0	0	0	0	0	0	0	0	0	0	0	0	0	0	0	0	0
PD7316a	387	0	4932	0	0	0	0	0	0	0	0	0	327	0	0	0	0	0	0	0	0	0	0	0	0	0	0	0	0	0
PD7321a	695	0	4395	0	0	0	0	0	0	0	0	0	963	0	0	0	0	0	0	0	0	0	0	0	0	0	0	0	0	0
PD7322a	673	0	0	0	982	0	0	0	0	0	0	0	0	0	0	0	0	359	0	0	0	0	0	0	0	0	0	0	0	0
PD7341a	702	220	0	0	1700	0	0	0	0	0	0	0	467	0	0	0	0	0	0	0	0	0	0	0	0	0	0	0	0	0
PD7344a	186	0	310	0	0	0	0	0	0	39	0	0	0	0	0	185	0	0	0	0	0	0	0	0	0	0	0	0	0	0
PD7426a	0	0	12756	0	0	0	0	0	0	0	0	0	5740	0	0	0	0	0	0	0	0	0	0	0	0	0	0	0	0	0
PD7428a	0	0	10120	0	0	0	0	4481	0	0	0	0	1347	0	0	0	0	0	0	0	0	0	0	0	0	0	0	0	0	0
PD8609a	0	2267	0	0	1732	0	0	0	0	0	0	0	1087	0	0	0	0	0	0	0	0	0	0	0	0	0	0	0	0	0
PD8610a	0	173	0	0	2949	0	0	1450	0	0	0	0	524	0	0	0	0	0	0	0	0	0	0	0	0	0	0	0	0	0
PD8611a	0	0	3598	0	2254	0	0	0	0	0	0	0	974	0	0	0	0	0	0	0	0	0	0	0	0	0	0	0	0	0
PD8612a	801	284	0	0	0	0	0	881	0	0	0	0	0	0	0	0	0	0	0	0	0	0	0	0	0	0	0	0	0	0
PD8614a	339	72	0	0	1027	0	0	0	0	0	0	0	0	0	0	0	0	0	0	0	0	0	0	0	0	0	0	0	0	0
PD8615a	632	507	1685	0	0	0	0	0	0	0	0	0	1444	0	0	0	0	0	0	0	0	0	0	0	0	0	0	0	0	0
PD8617a	439	0	0	0	1459	0	0	0	0	0	0	0	0	0	0	0	0	0	0	0	0	0	0	0	0	0	0	0	0	0
PD8618a	530	56	0	0	0	0	0	0	0	0	0	0	0	0	0	918	0	0	0	0	0	0	0	0	0	0	0	0	0	0
PD8619a	871	0	1298	0	1137	0	0	0	0	0	0	0	264	0	0	0	0	0	0	0	0	0	0	0	0	0	0	0	0	0
PD8620a	0	644	0	0	1129	0	0	0	0	0	0	0	883	0	0	0	0	0	0	0	0	0	0	0	0	0	0	0	0	0
PD8621a	963	0	6516	0	0	0	0	0	0	0	0	0	582	0	0	0	0	0	0	0	0	0	0	0	0	0	0	0	0	0
PD8622a	414	121	0	0	1272	0	0	0	0	0	0	0	0	0	0	0	0	0	0	0	0	0	0	0	0	0	0	0	0	0
PD8623a	495	239	645	0	0	0	0	0	0	0	0	0	0	0	0	639	0	0	0	0	0	0	0	0	0	0	0	0	0	0
PD8652a2	0	0	9573	0	4518	0	0	0	0	0	0	0	1764	0	0	0	0	0	0	0	0	0	0	0	0	0	0	0	0	0
PD8660a2	2521	1739	12888	0	0	0	0	0	5779	0	0	0	3199	0	0	0	0	0	0	0	0	0	0	0	0	0	0	0	0	0
PD8828a	572	355	0	0	818	0	0	0	0	0	0	0	314	0	0	0	0	0	0	0	0	0	0	0	0	0	0	0	0	0
PD8830a	1705	0	6540	0	0	0	0	0	0	0	0	0	0	0	0	0	0	0	0	0	0	0	0	0	0	0	0	0	0	0
PD8832a	0	0	17571	0	0	0	0	7834	0	0	0	0	1002	0	0	0	0	0	0	0	0	0	0	0	0	0	0	0	0	0
PD8964a	0	0	5129	0	5164	0	0	0	0	0	0	0	857	0	0	0	0	0	0	0	0	0	0	0	0	0	0	0	0	0
PD8965a	0	456	0	0	2409	0	0	1139	0	0	0	0	445	0	0	0	0	0	0	0	0	0	0	0	0	0	0	0	0	0
PD8969a	0	298	3110	0	2391	0	0	0	0	0	0	0	1019	0	0	0	0	0	0	0	0	0	0	0	0	0	0	0	0	0
PD8973a	1029	1416	0	0	0	0	0	0	0	0	0	0	3462	0	0	0	0	0	0	0	0	0	0	0	0	0	0	0	0	0
PD8977a	2111	0	0	0	0	0	0	845	0	0	0	0	0	0	0	1088	0	0	0	0	0	0	0	0	0	0	0	0	0	0
PD8978a	923	0	4325	0	0	0	0	0	969	0	0	0	451	0	0	0	0	0	0	0	0	0	0	0	0	0	0	0	0	0
PD8979a	869	235	0	0	2722	0	0	0	0	0	0	0	209	0	0	0	0	0	0	0	0	0	0	0	0	0	0	0	0	0
PD8980a	0	715	0	0	8095	0	0	5306	0	0	0	0	1341	0	0	0	0	0	0	0	0	0	0	0	0	0	0	0	0	0
PD8981a	525	101	0	0	0	0	0	831	0	0	157	0	130	0	0	0	0	0	0	0	0	0	0	0	0	0	0	0	0	0
PD8982a	0	0	14521	0	0	0	0	0	0	0	0	0	7035	0	0	0	0	0	0	0	0	0	0	0	0	0	0	0	0	0
PD8984a	1099	0	6865	0	0	0	0	0	0	0	0	0	1187	0	0	0	0	0	0	0	0	0	0	0	0	0	0	0	0	0
PD8995a	2107	2206	0	0	0	0	0	1631	0	0	0	0	1639	0	0	0	0	0	0	0	0	0	0	0	0	0	0	0	0	0
PD8996a	1316	0	0	0	0	0	204	1596	0	0	0	0	112	0	0	0	0	0	0	0	0	0	0	0	0	0	0	0	0	0
PD8997a	955	0	0	0	1570	0	0	0	0	0	0	0	305	0	0	0	0	0	0	0	0	0	0	0	0	0	0	0	0	0
PD8998a	0	958	0	0	2024	0	0	0	0	0	0	0	1785	0	0	0	0	0	0	0	0	0	0	0	0	0	0	0	0	0
PD8999a	441	55	0	0	850	0	0	0	0	0	0	0	0	0	0	0	0	0	0	0	0	0	0	0	0	0	0	0	0	0
PD9000a	0	355	5561	0	0	0	0	2770	0	0	0	0	822	0	0	0	0	0	0	0	0	0	0	0	0	0	0	0	0	0
PD9001a	738	0	0	0	1966	0	0	0	0	0	0	0	0	0	0	0	0	0	0	0	0	0	0	0	0	0	0	0	0	0
PD9002a	0	513	1857	0	0	0	0	1817	1347	0	0	0	0	854	0	2085	0	0	0	0	0	0	0	0	0	0	0	0	0	0
PD9004a	0	0	6249	0	0	0	0	2216	0	0	798	0	1359	0	0	0	0	0	0	0	0	0	0	0	0	0	0	0	0	0
PD9009a	0	2690	0	0	0	0	0	0	0	0	0	0	12519	0	0	0	0	0	0	0	0	0	0	0	0	0	0	0	0	0
PD9063a	0	30819	0	0	0	0	0	0	0	0	0	0	19225	0	0	0	0	0	0	0	0	0	0	0	0	0	0	0	0	0
PD9064a	1081	0	6596	0	0	0	0	3827	0	0	0	0	845	0	0	0	0	0	0	0	0	0	0	0	0	0	0	0	0	0
PD9065a	544	290	0	0	858	0	0	0	0	0	0	0	0	0	0	0	0	516	0	0	0	0	0	0	0	0	0	0	0	0
PD9067a	479	172	0	0	776	0	0	0	0	0	0	0	125	0	0	0	0	0	0	0	0	0	0	0	0	0	0	0	0	0
PD9193a	611	0	695	0	0	0	0	0	0	0	0	0	174	0	0	0	0	200	0	0	0	0	0	0	0	0	0	0	0	0
PD9464a	657	345	0	0	2438	0	0	1387	0	0	0	0	422	0	0	0	0	0	0	0	0	0	0	0	0	0	0	0	0	0
PD9467a	1081	182	0	0	0	0	0	997	0	0	201	0	0	0	0	0	0	0	0	0	0	0	0	0	0	0	0	0	0	0
PD9539a	2323	0	0	0	0	0	0	1256	0	0	0	0	0	0	0	0	0	0	0	0	0	0	0	0	0	0	0	0	0	0
PD9541a	1358	285	1061	0	0	0	0	0	0	0	0	0	0	0	0	0	0	0	0	0	0	0	0	0	0	0	0	0	0	0
PD9544a	437	92	0	0	858	0	0	0	0	0	0	0	0	0	0	0	0	0	0	0	0	0	0	0	0	0	0	0	0	0
PD9567a	934	207	0	0	2136	0	0	0	0	0	0	0	233	0	0	0	0	0	0	0	0	0	0	0	0	0	0	0	0	0
PD9568a	2147	0	23781	0	0	0	0	0	0	0	0	0	4466	0	0	0	0	0	0	0	0	0	0	0	0	0	0	0	0	0
PD9569a	675	0	0	0	1465	0	0	0	0	0	0	0	0	0	0	0	0	0	0	0	0	0	0	0	0	0	0	0	0	0
PD9570a	540	288	0	0	0	0	0	576	0	0	0	0	0	0	0	0	0	0	0	0	0	0	0	0	0	0	0	0	0	0
PD9571a	665	0	1580	0	2234	0	0	0	0	0	0	0	220	0	0	0	0	0	0	0	0	0	0	0	0	0	0	0	0	0
PD9572a	715	0	1105	0	0	0	0	0	0	0	0	0	1055	0	0	1206	0	0	0	0	0	0	0	0	0	0	0	0	0	0
PD9573a	736	0	0	0	879	0	0	0	0	0	0	0	0	0	0	0	0	0	0	0	0	0	0	0	0	0	0	0	0	0
PD9574a	585	0	0	0	1048	0	0	0	0	0	0	0	0	0	0	0	0	0	0	0	0	0	0	0	0	0	0	0	0	0
PD9575a	776	0	2542	0	0	0	0	0	0	0	0	0	621	0	0	2558	0	0	0	0	0	0	0	0	0	0	0	0	0	0
PD9576a	1407	0	12461	0	0	0	0	3969	0	0	0	0	0	0	0	0	0	0	0	0	0	0	0	0	0	0	0	0	0	0
PD9577a	452	42	0	0	1129	0	0	0	0	0	0	0	0	0	0	0	0	0	0	0	0	0	0	0	0	0	0	0	0	0
PD9578a	297	0	0	0	0	0	0	364	0	0	0	0	0	0	0	312	0	0	0	0	0	0	0	0	0	0	0	0	0	113
PD9579a	436	0	0	0	1065	0	0	0	0	0	0	0	131	0	0	0	0	0	0	0	0	0	0	0	0	0	0	0	0	0
PD9581a	598	0	0	0	0	0	0	280	0	0	0	0	0	0	0	736	0	0	0	0	0	0	0	0	0	0	0	0	0	0
PD9582a	1045	115	1389	0	0	0	0	0	0	0	0	0	189	0	0	0	0	0	0	0	0	0	0	0	0	0	0	0	0	0
PD9584a	820	143	0	0	1788	0	0	0	0	0	0	0	0	0	0	0	0	0	0	0	0	0	0	0	0	0	0	0	0	0
PD9585a	809	0	4682	0	0	0	0	3520	0	0	0	0	1271	0	0	0	0	0	0	0	0	0	0	0	0	0	0	0	0	0
PD9589a	421	163	0	0	828	0	0	0	0	0	0	0	0	0	0	0	0	0	0	0	0	0	0	0	0	0	0	0	0	0
PD9591a	447	66	0	0	781	0	0	0	0	0	0	0	0	0	0	0	0	0	0	0	0	0	0	0	0	0	0	0	0	0
PD9592a	705	0	7790	0	0	0	0	0	0	0	0	0	0	0	0	0	0	0	0	0	0	0	0	0	0	0	0	0	0	0
PD9593a	414	0	0	0	1143	0	59	0	0	0	0	0	0	0	0	0	0	0	0	0	0	0	0	0	0	0	0	0	0	0
PD9595a	1217	0	6086	0	0	0	0	2418	0	0	0	0	0	0	0	0	0	0	0	0	0	0	0	0	0	0	0	0	0	0
PD9597a	792	1310	0	0	0	0	0	0	0	0	0	0	807	0	0	0	0	0	0	0	0	0	0	0	0	0	0	0	0	0
PD9599a	1405	163	0	0	0	0	0	0	0	0	0	0	287	0	0	1438	0	0	0	0	0	0	0	0	0	0	0	0	0	0
PD9600a	613	0	758	0	646	0	0	0	0	0	0	0	0	0	0	0	0	0	0	0	0	0	0	0	0	0	0	0	0	0
PD9605a	857	141	0	0	1325	0	0	1048	0	0	0	0	0	0	0	0	0	0	0	0	0	0	0	0	0	0	0	0	0	0
PD9606a	581	0	0	0	0	0	0	283	0	0	0	0	0	0	0	356	0	0	0	0	0	0	0	0	0	0	0	0	0	0
PD9694a	976	0	735	0	0	0	0	0	0	0	0	0	0	0	0	0	0	0	0	0	0	0	0	0	0	0	0	0	0	0
PD9696a	457	0	4708	0	0	0	0	0	0	0	0	0	698	0	0	0	0	0	0	0	0	0	0	0	0	0	0	0	0	0
PD9702a	0	0	6616	0	0	0	0	0	0	0	0	0	1244	0	0	0	0	0	0	0	0	0	0	0	0	0	0	0	0	0
PD9752a	1125	275	0	0	1687	0	0	0	0	0	0	0	387	0	0	0	0	0	0	0	0	0	0	0	0	0	0	0	0	0
PD9754a	677	0	0	0	742	0	0	477	0	0	0	0	0	0	0	0	0	0	0	0	0	0	0	0	0	0	0	0	0	0
PD9755a	480	0	0	0	0	0	0	428	0	0	0	0	0	0	0	376	0	0	0	0	0	0	0	0	0	0	0	0	0	424
PD9756a	0	1321	1873	0	0	0	0	0	0	0	0	0	1016	0	0	0	0	0	0	0	0	0	0	0	0	0	0	0	0	0
PD9759a	676	158	0	0	1356	0	0	0	0	0	0	0	0	0	0	0	0	0	0	0	0	0	0	0	0	0	0	0	0	0
PD9760a	1198	546	0	0	2656	0	0	0	0	0	0	0	603	0	0	0	0	0	0	0	0	0	0	0	0	0	0	0	0	0
PD9761a	776	103	0	0	0	0	0	557	0	0	0	0	0	0	0	665	0	0	0	0	0	0	0	0	0	0	0	0	0	0
PD9842a	758	0	0	0	2281	0	0	0	0	0	0	0	160	0	0	0	0	0	0	0	0	0	0	0	0	0	0	0	0	0
PD9843a	331	0	0	0	1678	0	0	0	0	0	0	0	0	0	0	0	0	0	0	0	0	0	0	0	0	0	0	0	0	0
PD9844a	83	0	0	0	263	0	0	0	0	0	0	0	0	0	0	0	0	0	61	0	0	0	0	0	0	0	0	0	98	0
PD9845a	531	380	0	0	2234	0	0	0	0	0	0	0	0	0	0	0	0	0	0	0	0	0	0	0	0	0	0	0	0	0
PD9847a	485	0	0	0	1743	0	0	0	0	0	0	0	0	0	0	0	0	0	0	0	0	0	0	0	0	0	0	0	0	0
PD11353a	843	0	0	0	1353	0	0	646	0	0	0	0	0	0	0	0	0	0	0	0	0	0	0	0	0	0	0	0	0	0
PD11354a	1079	0	0	0	1628	0	0	0	0	0	0	0	0	0	0	0	0	0	0	0	0	0	0	0	0	0	0	0	0	0
PD11378a	579	0	0	0	0	0	0	703	0	0	0	0	0	0	0	613	0	0	0	0	0	0	0	0	0	0	0	0	0	423
PD12664a	751	0	0	0	1528	0	0	0	0	0	174	0	199	0	0	0	0	0	0	0	0	0	0	0	0	0	0	0	0	0
PD13352a	425	73	0	0	1227	0	0	0	0	0	0	0	0	0	0	0	0	0	0	0	0	0	0	0	0	0	0	0	0	0
PD13353a	778	129	0	0	1486	0	0	0	0	0	0	0	159	0	0	0	0	0	0	0	0	0	0	0	0	0	0	0	0	0
PD13357a	907	666	1079	0	0	0	0	0	0	0	0	0	1148	0	0	0	0	0	0	0	0	0	0	0	0	0	0	0	0	0
PD13358a	533	90	819	0	0	0	0	0	0	0	0	0	0	0	0	0	0	0	0	0	0	0	0	0	0	0	0	0	0	0
PD13359a	378	94	0	0	602	0	0	0	0	0	0	0	0	0	0	0	0	0	0	0	0	0	0	0	0	0	0	0	0	0
PD13632a	0	0	0	0	0	0	0	0	0	0	0	0	18640	0	0	0	0	0	0	0	0	0	0	0	0	0	0	0	0	0
PD13633a	1464	480	0	0	0	0	0	2186	0	0	0	0	547	0	0	0	0	0	0	0	0	0	0	0	0	0	0	0	0	0
PD13769a	0	7934	0	0	0	0	0	0	0	0	0	0	4784	0	0	0	0	0	0	0	0	0	0	0	0	0	0	0	0	0
PD14434a	0	0	2006	0	0	432	0	1293	0	0	0	0	426	0	0	999	0	0	0	0	0	0	0	0	0	0	0	0	0	0
PD14436a	569	197	0	0	1260	0	0	539	0	0	0	0	0	0	0	0	0	0	0	0	0	0	0	0	0	0	0	0	0	0
PD14443a	941	424	0	0	1238	0	0	1212	0	0	0	0	0	0	0	0	0	0	0	0	0	0	0	0	0	0	0	0	0	0
PD14444a	379	108	0	0	1260	0	0	0	0	0	0	0	0	0	0	0	0	0	0	0	0	0	0	0	0	0	0	0	0	0
PD14445a	414	0	0	0	0	0	0	0	0	0	0	0	59	0	0	629	0	0	0	0	0	0	0	0	0	0	0	0	0	121
PD14446a	687	333	2891	0	0	0	0	2605	0	0	493	0	916	0	0	0	0	0	0	0	0	0	0	0	0	0	0	0	0	0
PD14447a	631	0	0	0	0	0	0	525	0	0	0	0	0	0	0	555	0	0	0	0	0	0	0	0	0	0	0	0	0	0
PD14449a	799	205	0	0	1948	0	0	0	0	0	0	0	0	0	0	0	0	0	0	0	0	0	0	0	0	0	0	0	0	0
PD14452a	811	0	2622	0	0	0	0	1208	0	0	0	0	431	0	0	0	0	0	0	0	0	0	0	0	0	0	0	0	0	0
PD14455a	0	21768	0	0	0	0	0	0	0	0	0	0	18127	0	0	0	0	0	0	0	0	0	0	0	0	0	0	0	0	0
PD14466a	770	317	0	0	2484	0	0	0	0	0	0	0	247	0	0	0	0	0	0	0	0	0	0	0	0	0	0	0	0	0
PD14469a	1693	576	0	0	6216	0	0	0	0	0	0	0	965	0	0	0	0	0	0	0	0	0	0	0	0	0	0	0	0	0
PD14470a	609	0	0	0	0	0	0	340	0	0	0	0	0	0	0	420	0	0	0	0	0	0	0	0	0	0	0	0	0	0
PD14474a	867	0	0	0	2172	0	0	0	0	0	0	0	167	0	0	0	0	0	0	0	0	0	0	0	0	0	0	0	0	0
PD17976a	887	0	0	0	949	0	0	0	0	0	0	0	0	0	0	0	0	0	0	0	0	0	0	0	0	0	0	0	0	0
PD17982a	557	0	0	0	0	0	0	0	0	0	0	0	0	0	0	703	0	0	0	0	0	0	0	0	0	0	0	0	0	145
PD17986a	493	0	2868	0	0	0	0	894	0	0	0	0	0	0	0	0	0	0	0	0	0	0	0	0	0	0	0	0	0	0
PD17996a	890	155	0	0	1322	0	0	0	0	0	0	0	122	0	0	0	0	0	0	0	0	0	0	0	0	0	0	0	0	0
PD18006a	404	0	0	0	0	0	0	412	0	0	0	0	0	0	0	711	0	0	0	0	0	0	0	0	0	0	0	0	0	0
PD18007a	787	0	5084	0	2127	0	0	0	0	0	0	0	0	0	0	0	0	0	0	0	0	0	0	0	0	0	0	0	0	0
PD18008a	763	0	3829	0	0	0	0	4055	0	0	0	0	604	0	0	0	0	1425	0	0	0	0	0	0	0	0	0	0	0	0
PD18010a	1131	0	1522	0	0	0	0	0	0	0	0	0	0	0	0	787	199	0	0	0	0	0	0	0	0	0	0	0	0	0
PD18111a	426	0	0	0	1147	0	0	0	0	0	0	0	0	0	0	0	0	0	0	0	0	0	0	0	0	0	0	0	0	0
PD18170a	932	481	1822	0	0	0	0	0	0	0	0	0	413	0	0	0	0	0	0	0	0	0	0	0	0	0	0	0	0	0
PD18175a	1095	0	0	0	3940	0	0	0	1127	0	0	0	345	0	0	0	0	0	0	0	0	0	0	0	0	0	0	0	0	0
PD18178a	506	87	0	0	1807	0	0	0	0	0	0	0	0	0	0	0	0	0	0	0	0	0	0	0	0	0	0	0	0	0
PD18184a	2036	564	0	0	3841	0	0	0	0	0	0	0	0	0	0	0	0	0	0	0	0	0	0	0	0	0	0	0	0	0
PD18233a	386	515	1803	0	0	0	0	1150	0	0	0	0	377	0	0	0	0	0	0	0	0	0	0	0	0	0	0	0	0	0
PD18237a	0	867	6360	0	0	0	0	7031	0	0	0	0	1660	0	0	0	0	0	0	0	0	0	0	0	0	0	0	0	0	0
PD18758a	408	0	0	0	900	0	92	0	0	0	0	0	0	0	0	0	0	0	0	0	0	0	0	0	0	0	0	0	0	0
PD18760a	743	0	0	0	0	0	0	793	0	0	0	0	0	0	0	0	0	0	0	0	0	0	0	0	0	0	0	0	0	0
PD18761a	375	71	0	0	0	0	0	365	0	0	0	0	0	0	0	497	0	0	0	0	0	0	0	0	0	0	0	0	0	0
PD18762a	372	43	0	0	888	0	0	0	0	0	0	0	0	0	0	0	0	0	0	0	0	0	0	0	0	0	0	0	0	0
PD18763a	526	154	0	0	0	0	0	319	0	0	0	0	0	0	0	397	0	0	0	0	0	0	0	0	0	0	0	0	0	0
PD18764a	376	0	0	0	0	0	0	234	0	0	0	0	0	0	0	371	0	0	0	0	0	0	0	0	0	0	0	0	0	0
PD18765a	680	0	0	0	1645	0	0	0	0	0	0	0	0	0	0	0	0	0	0	0	0	0	0	0	0	0	0	0	0	0
PD18772a	468	91	0	0	594	0	0	0	0	0	0	0	0	0	0	0	0	0	0	0	0	0	0	0	0	0	0	0	0	0
PD18777a	578	0	1779	0	0	0	0	0	0	0	0	0	0	0	0	0	0	0	0	0	0	0	0	0	0	0	0	0	0	0
PD20341a	459	0	0	0	802	0	0	0	0	0	0	0	0	0	0	0	0	0	0	0	0	0	0	0	0	0	0	0	0	0
PD20342a	394	0	0	0	1195	0	0	503	0	0	0	0	0	0	0	0	0	0	0	0	0	0	0	0	0	0	0	0	0	0
PD20343a	515	0	0	0	1242	0	0	0	0	0	0	0	0	0	0	0	0	757	0	0	0	0	0	0	0	0	0	0	0	0
PD20344a	636	0	4504	0	0	0	0	2095	0	0	0	0	680	0	0	0	0	0	0	0	0	0	0	0	0	0	0	0	0	0
PD20345a	171	0	0	0	794	0	0	0	0	0	0	0	0	0	0	0	0	0	0	0	0	0	0	0	0	0	0	0	0	0
PD20347a	422	0	0	0	1693	0	0	0	0	0	0	0	106	0	0	0	0	0	0	0	0	0	0	0	0	0	0	0	0	0
PD20348a	507	115	0	0	1166	0	0	523	0	0	0	0	0	0	0	0	0	0	0	0	0	0	0	0	0	0	0	0	0	0
PD20400a	461	0	0	0	1096	0	0	0	0	0	0	0	0	0	0	0	0	0	0	0	0	0	0	0	0	0	0	0	0	0
PD20401a	809	0	0	0	1138	0	0	603	0	0	0	0	221	0	0	0	0	0	0	0	0	0	0	0	0	0	0	0	0	0
PD20403a	796	132	0	0	0	0	0	475	0	0	0	0	0	0	0	438	0	0	0	0	0	0	0	0	0	0	0	0	0	0
PD20404a	859	149	0	0	1560	0	0	641	0	0	0	0	0	0	0	0	0	0	0	0	0	0	0	0	0	0	0	0	0	0
PD20405a	558	65	768	0	0	0	0	0	0	0	0	0	0	0	0	0	0	0	0	0	0	0	0	0	0	0	0	0	0	0
PD4075a	556	0	0	0	0	0	0	368	0	0	0	0	0	0	0	228	0	0	0	0	0	0	0	0	0	0	0	0	0	0
PD6700a2	2131	0	0	0	0	0	0	0	0	0	0	856	0	0	0	0	0	0	0	0	0	0	0	0	0	0	0	0	0	0
PD6701a2	1042	0	0	0	1646	0	0	1170	0	0	0	0	0	0	0	0	0	0	0	0	0	0	0	0	0	0	0	0	0	513
PD7239a	328	246	0	0	2040	0	0	0	0	0	0	0	0	0	0	0	0	0	0	0	0	0	0	0	0	0	0	212	0	0
PD7308a	1964	0	3714	0	0	0	0	0	0	0	0	0	357	0	0	0	0	0	0	0	0	0	0	0	0	0	0	0	0	0
PD7310a	601	246	0	0	1431	0	0	0	0	0	0	0	0	0	0	0	0	0	0	0	0	0	0	0	0	0	0	0	0	0
PD7311a	612	0	0	0	800	0	0	0	0	0	0	0	0	0	0	0	0	308	0	0	0	0	0	0	0	0	0	0	0	0
PD7314a	1007	0	689	0	0	0	0	0	0	0	0	0	0	0	0	593	0	0	0	0	0	0	0	0	0	0	0	0	0	0
PD7317a	543	190	0	0	1535	0	0	0	0	0	0	0	0	0	0	0	0	0	0	0	0	0	0	0	0	0	0	0	0	0
PD7319a	647	0	699	0	0	0	0	0	0	0	0	0	0	0	0	526	0	0	0	0	0	0	0	0	0	0	0	0	0	0
PD7454a	1509	0	0	0	2010	0	0	0	0	0	0	0	0	0	0	0	0	0	0	0	0	0	0	0	0	0	0	0	0	0
PD7455a	574	0	0	0	1181	0	0	0	0	0	0	0	265	0	0	0	0	0	0	0	0	0	0	0	0	0	0	0	0	0
PD8823a	523	184	0	0	1302	0	0	0	0	0	0	0	0	0	0	0	0	0	0	0	0	0	0	0	0	0	0	0	0	0
PD8826a	329	0	0	0	902	0	0	0	0	0	0	0	0	0	0	0	0	151	0	0	0	0	0	0	0	0	0	0	0	0
PD9066a	0	1270	0	0	1796	0	0	0	0	0	0	0	537	0	0	0	0	0	0	0	0	0	0	0	0	0	0	0	0	0
PD9590a	207	80	0	0	730	0	0	0	0	0	0	0	108	0	0	0	0	0	0	0	0	0	0	0	0	0	0	0	0	0
PD9596a	323	82	0	0	1117	0	0	0	0	0	0	0	0	0	0	0	0	0	0	0	0	0	0	0	0	0	0	0	0	0

## Sheet: (g) Ovarian
(g) Exposure in the ovarian sample (AOCS-166) using 3 different values of alpha
Sample	alpha	Signature.1	Signature.2	Signature.3	Signature.4	Signature.5	Signature.6	Signature.7	Signature.8	Signature.9	Signature.10	Signature.11	Signature.12	Signature.13	Signature.14	Signature.15	Signature.16	Signature.17	Signature.18	Signature.19	Signature.20	Signature.21	Signature.22	Signature.23	Signature.24	Signature.25	Signature.26	Signature.27	Signature.28	Signature.29	Signature.30
AOCS-166	0	0	0	0	0	0	3417	0	0	9679	0	0	18402	1327	0	0	0	0	0	0	0	0	0	0	0	0	6095	0	0	0	0
AOCS-166	0.01	0	0	0	0	0	4745	0	0	9679	0	0	24498	0	0	0	0	0	0	0	0	0	0	0	0	0	0	0	0	0	0
AOCS-166	0.02	0	0	0	0	0	4745	0	0	9679	0	0	24498	0	0	0	0	0	0	0	0	0	0	0	0	0	0	0	0	0	0
