# Supplementary material for: Whole-Genome Sequencing Reveals Breast Cancers with Mismatch Repair Deficiency
Source: Oxford University Press journal article supplement (doi:10.1158/0008-5472.can-17-1083), 2017-09-13
Supplement: 00085472can171083-sup-181668_2_supp_4164089_pt8c9p.xlsx [file 00085472can171083-sup-181668_2_supp_4164089_pt8c9p.xlsx]

## Sheet: Sheet1
Supplementary Table 3: Mutations in MMR genes
Potentially pathogenic mutations in MMR genes with loss of the alternative allele
Sample	Chromosome	Position	WT	MUT	Gene	CCDS	c.	p.	Type	Effect	Mutation_Type	Loss_of_Alternative_Allele	dbSNP_id
PD24193a	3	37090394	G	C	MLH1	CCDS2663.1	c.1990-1G>C	p.?	Sub	ess splice	Somatic	YES
PD6412a	3	37090896	AAAACAAGGCTCTATAACTCCTCTTACAGGTCAGCTTGACACAAAAAGGGTGCCTGGATTCCTAATGTTTCATTGTCACTTTTCCCAGTCAGATGATAATGCTTTTCAAATCAACATATATTTTGGGGGAGGTTGGAAGGGAGAGTTGAAATATTCTAAGAATCAAAGAGTAGCCCACTTTAATCAGAGTATGACCCCTGATTGCTCACAGTCATCTCCTGAGCAGTGTGAGCGAGTTTCAGATGAGGAGGCTGAAGGCCAGTCAGGCATGCTCGAGGATTCCAAGTCTGTAGGTGGGAGGGCAGAGATTTAGTCCTGTTGGCCAAAGCCTCTAGGGAATTTCTCACTCCAGTGGAGAAGGCAACACACTTACCAAACTGTGTGGAAACTATCTCATTT…	A	MLH1	CCDS2663.1	c.2103+389_2193del1170	p.?	Del	ess splice	Somatic	YES
PD7318a	3	37090092	G	GC	MLH1	CCDS2663.1	c.1981_1982insC	p.T662fs*2	ins	frameshift	Germline	YES
PD5937a	2	47643501	C	T	MSH2	CCDS1834.1	c.1009C>T	p.Q337*	Sub	nonsense	Somatic	YES
PD5937a	2	47690201	C	A	MSH2	CCDS1834.1	c.1418C>A	p.S473*	Sub	nonsense	Somatic	YES
PD11365a	7	6045549	C	A	PMS2	CCDS5343.1	c.137G>T	p.S46I	Sub	missense	Germline	YES	rs121434629
PD9604a	3				MLH1				Promoter hypermethylation
Mutations in MMR genes with loss of alternative allele, significance unknown
PD24320a	3	47129689	CAG	C	SETD2	CCDS2749.2	c.5189_5190delCT	p.S1730fs*1	Del	frameshift	Somatic	YES
PD4606a	16	15815278	C	G	MYH11	CCDS45423.1	c.4599+1G>C	p.?	Sub	ess splice	Somatic	YES
Potentially pathogenic mutations in MMR genes, wild type allele retained
PD22361a	7	6035259	G	C	PMS2	CCDS5343.1	c.809C>G	p.S270*	Sub	nonsense	Somatic	NO
PD13608a	7	6026514	G	A	PMS2	CCDS5343.1	c.1882C>T	p.R628*	Sub	nonsense	Germline	NO	rs63750451
PD4072a	3	47161957	G	C	SETD2	CCDS2749.2	c.4169C>G	p.S1390*	Sub	nonsense	Somatic	NO
PD9541a	3	47125824	C	A	SETD2	CCDS2749.2	c.5446G>T	p.E1816*	Sub	nonsense	Somatic	NO
PD18748a	3	47158225	G	A	SETD2	CCDS2749.2	c.4474C>T	p.R1492*	Sub	nonsense	Somatic	NO
PD11357a	3	47162506	GAAGA	G	SETD2	CCDS2749.2	c.3616_3619delTCTT	p.S1206fs*29	Del	frameshift	Somatic	NO
PD22360a	14	75500117		G	MLH3	CCDS32123.1	c.3715+5G>C	p.?	Sub	ess splice	Somatic	NO
PD5936a	14	75515473	GC	G	MLH3	CCDS32123.1	c.885delG	p.H296fs*12	Del	frameshift	Germline	NO
PD8981a	2	190719760	C	T	PMS1	CCDS2302.1	c.1762C>T	p.Q588*	Sub	nonsense	Germline	NO
PD18037a	1	190719760	C	T	MUTYH	CCDS44129.1	c.1187G>A	p.G396D	Sub	missense	Germline	NO	rs36053993
PD13765a	1	190719760	C	T	MUTYH	CCDS44129.1	c.1187G>A	p.G396D	Sub	missense	Germline	NO	rs36053993
PD14442a	1	190719760	C	T	MUTYH	CCDS44129.1	c.1187G>A	p.G396D	Sub	missense	Germline	NO	rs36053993
PD13422a	1	190719760	C	T	MUTYH	CCDS44129.1	c.1187G>A	p.G396D	Sub	missense	Germline	NO	rs36053993
PD4115a	1	190719760	C	T	MUTYH	CCDS44129.1	c.1187G>A	p.G396D	Sub	missense	Germline	NO	rs36053993
PD18006a	2	48027656	A	AT	MSH6	CCDS1836.1	c.2534_2535insT	p.E846fs*1	Ins	frameshift	Germline	NO	rs587779241
